# Supplementary material for: COVID-19 vaccination effectiveness rates by week and sources of bias: a retrospective cohort study
Source: PubMed Central journal article supplement — BMJ Open. 2022 Aug 23;12(8):e061126. doi: 10.1136/bmjopen-2022-061126 (PMC9402447; doi:10.1136/bmjopen-2022-061126), 2022-08-23
Supplement: bmjopen-2022-061126.draft_revisions.pdf [file bmjopen-2022-061126.draft_revisions.pdf]

# BMJ Open

BMJ Open is committed to open peer review. As part of this commitment we make the peer review history of every article we publish publicly available.

When an article is published we post the peer reviewers' comments and the authors' responses online. We also post the versions of the paper that were used during peer review. These are the versions that the peer review comments apply to.

The versions of the paper that follow are the versions that were submitted during the peer review process. They are not the versions of record or the final published versions. They should not be cited or distributed as the published version of this manuscript.

BMJ Open is an open access journal and the full, final, typeset and author-corrected version of record of the manuscript is available on our site with no access controls, subscription charges or pay-per-view fees (<http://bmjopen.bmj.com>).

If you have any questions on BMJ Open's open peer review process please email [info.bmjopen@bmj.com](mailto:info.bmjopen@bmj.com)

# BMJ Open

## COVID-19 vaccination effectiveness rates by week and sources of bias

|                               |                                                                                                                                                                                                                           |
|-------------------------------|---------------------------------------------------------------------------------------------------------------------------------------------------------------------------------------------------------------------------|
| Journal:                      | <i>BMJ Open</i>                                                                                                                                                                                                           |
| Manuscript ID                 | bmjopen-2022-061126                                                                                                                                                                                                       |
| Article Type:                 | Original research                                                                                                                                                                                                         |
| Date Submitted by the Author: | 17-Jan-2022                                                                                                                                                                                                               |
| Complete List of Authors:     | Ostropolets, Anna; Columbia University Medical Center, Department of Biomedical Informatics<br>Hripcsak, George; Columbia University Medical Center, Department of Biomedical Informatics; New York-Presbyterian Hospital |
| Keywords:                     | COVID-19, Health informatics < BIOTECHNOLOGY & BIOINFORMATICS, EPIDEMIOLOGY                                                                                                                                               |
|                               |                                                                                                                                                                                                                           |

SCHOLARONE™  
Manuscripts

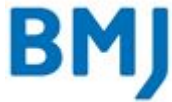

I, the Submitting Author has the right to grant and does grant on behalf of all authors of the Work (as defined in the below author licence), an exclusive licence and/or a non-exclusive licence for contributions from authors who are: i) UK Crown employees; ii) where BMJ has agreed a CC-BY licence shall apply, and/or iii) in accordance with the terms applicable for US Federal Government officers or employees acting as part of their official duties; on a worldwide, perpetual, irrevocable, royalty-free basis to BMJ Publishing Group Ltd ("BMJ") its licensees and where the relevant Journal is co-owned by BMJ to the co-owners of the Journal, to publish the Work in this journal and any other BMJ products and to exploit all rights, as set out in our [licence](#).

The Submitting Author accepts and understands that any supply made under these terms is made by BMJ to the Submitting Author unless you are acting as an employee on behalf of your employer or a postgraduate student of an affiliated institution which is paying any applicable article publishing charge ("APC") for Open Access articles. Where the Submitting Author wishes to make the Work available on an Open Access basis (and intends to pay the relevant APC), the terms of reuse of such Open Access shall be governed by a Creative Commons licence – details of these licences and which [Creative Commons](#) licence will apply to this Work are set out in our licence referred to above.

Other than as permitted in any relevant BMJ Author's Self Archiving Policies, I confirm this Work has not been accepted for publication elsewhere, is not being considered for publication elsewhere and does not duplicate material already published. I confirm all authors consent to publication of this Work and authorise the granting of this licence.

1  
2  
3  
4  
5  
6  
7  
8  
9  
10  
11  
12  
13  
14  
15  
16  
17  
18  
19  
20  
21  
22  
23  
24  
25  
26  
27  
28  
29  
30  
31  
32  
33  
34  
35  
36  
37  
38  
39  
40  
41  
42  
43  
44  
45  
46  
47  
48  
49  
50  
51  
52  
53  
54  
55  
56  
57  
58  
59  
60

## COVID-19 vaccination effectiveness rates by week and sources of bias

Anna Ostroplets, MD<sup>1</sup>, George Hripcsak, MD<sup>1,2</sup>

<sup>1</sup>Department of Biomedical Informatics, Columbia University Medical Center, New York, NY, USA

<sup>2</sup>Medical Informatics Services, New York-Presbyterian Hospital, New York, NY, USA;

Corresponding author: George Hripcsak, [gh13@cumc.columbia.edu](mailto:gh13@cumc.columbia.edu), Columbia University Irving Medical Center, 622 West 168th Street, PH-20, New York, NY, USA

## ABSTRACT

### Objective

To examine granular weekly COVID-19 vaccine effectiveness and assess the feasibility of using observational data for vaccine effectiveness studies.

### Design and setting

Retrospective cohort study using Columbia University Medical Center data linked to State and City Immunization Registries.

### Outcomes and measures

We used propensity score matching with up to 54,987 covariates and fitted Cox proportional hazards models to estimate hazard ratios and constructed Kaplan-Meier plots for two main outcomes (COVID-19 infection and COVID-19-associated hospitalization). We conducted manual chart review of cases in week one in both groups along with a set of sensitivity analyses for Pfizer- BioNTech, Moderna and Janssen vaccines.

### Results

The study included 179,666 patients. We observed increasing effectiveness after the first dose of mRNA vaccines with week six effectiveness approximating 84% (95% CI 72-91%) for COVID-19 infection and 86% (95% CI 69-95) for COVID-19-associated hospitalization. When analyzing unexpectedly high effectiveness in week one, chart review revealed that vaccinated patients are less likely to seek care after vaccination and are more likely to be diagnosed with COVID-19 during the encounters for other conditions. Sensitivity analyses highlighted potential outcome misclassification for ICD10-CM diagnosis, the influence of excluding patients with prior COVID-19 infection and anchoring in the unexposed group. Overall vaccine effectiveness in fully vaccinated patients matched the results of the randomized trials.

### Conclusions

Observational data can be used to ascertain vaccine effectiveness if potential biases are accounted for. The data need to be scrutinized to ensure compared groups exhibit similar health seeking behavior and are equally likely to be captured in the data. Given the difference in temporal trends of vaccine exposure and baseline characteristics, indirect comparison of vaccines may produce biased results.

### Strengths and limitations of this study

- This study thoroughly investigates weekly COVID-19 vaccine effectiveness using methods to reduce potential confounding (large-scale propensity score matching, negative control calibration) and accompanied by manual chart review of the cases in week one
- The study includes a range of sensitivity analyses for different patient populations, anchoring strategies and outcome definitions.
- The study was carried out using routinely collected clinical practice data, which represents real-world patients, but also implies a risk of misclassification.

**Word count:** 3179

**Keywords:** COVID-19, Epidemiology, Health Informatics

## BACKGROUND

Randomized clinical phase-3 trials have demonstrated high efficacy for the three US-authorized COVID-19 vaccines against symptomatic COVID-19 infection, ranging from 66.9% for Ad26.COV2.S (Johnson & Johnson–Janssen) to 94.1% and 94.6% for BNT162b2 (Pfizer–BioNTech) and mRNA-1273 (Moderna) vaccines (1–3). Their fast approval and widespread use require robust post-marketing studies that leverage large sample size, heterogeneous populations, and longer follow-up available in observational data.

There have been several recent observational studies, which have shown effectiveness similar to the randomized clinical trials (RCTs). Thompson et al. used a test-negative design to examine the effectiveness of Pfizer–BioNTech and Moderna vaccines with respect to COVID-19 hospitalization across a network of institutions (4). The cohort study by Tartof et al. examined the effectiveness of Pfizer–BioNTech against COVID-19 infection and hospitalization in fully vaccinated patients, reporting the limitations of matching the vaccinated and unvaccinated populations (5). Another cohort study by Polinski et al. used a large population to assess the effectiveness of Ad26.COV2.S and obtained similar results despite the fact that the data source did not allow to ascertain vaccination status for all patients (6). There were several non-US studies showing similar overall effectiveness, which nevertheless may not be generalizable to the US population due to differences in patient populations, COVID-19 variants spread and baseline COVID-19 prevalence (7–11).

While the existing observational studies matched randomized clinical trial results, there is a growing number of pressing questions related to COVID-19 vaccine effectiveness such as effectiveness against new variants and vaccine durability, for which trials may not be readily available (12). Moreover, the challenges associated with the use of observational data such as incomplete data capture, outcome misclassification and appropriate comparator sampling can undermine the results of the studies if such biases are not accounted for (13). Such biases are illustrated in the estimates of vaccine effectiveness during the first two weeks following the first dose. Studies have shown contradicting results for Pfizer–BioNTech vaccine with effectiveness ranging from moderate effectiveness of 52% (3) to very high effectiveness of 92.6% (14). Similarly, a recent study showed an unexplained high effectiveness of Janssen vaccine during week one (15). While week one lack of effectiveness has been suggested as a metric for lack of confounding in the long-term vaccine effectiveness studies, the reasons for high

effectiveness and its impact on the validity of the conclusions regarding the overall effectiveness remain unclear (10).

The goal of this study was to examine granular weekly effectiveness estimates and uncover underlying biases and challenges associated with the use of observational data for vaccine effectiveness studies. We employed large-scale propensity score matching and many negative controls to reduce and assess bias, and leveraged a range of sensitivity analyses as well as manual review of the COVID-19 infection cases during the first week after vaccination.

## METHODS

### *Main design*

For this retrospective observational cohort study, we used electronic health records from the Columbia University Irving Medical Center (CUIMC) database (Appendix 1), which has an ongoing automated connection to New York City and State public health department vaccine registries and includes all within-state vaccinations for our population. The data were translated to the OMOP Common Data Model version 5 and was previously used in multiple studies (16).

We studied the three main US COVID-19 vaccines separately. Three target cohorts included patients indexed on the first dose of one of the corresponding vaccines with no prior COVID-19 infection and no previous exposure to other COVID-19 vaccines. Our comparator group was unvaccinated patients who were indexed on a date selected from the unvaccinated patient's history (not necessarily with any medical event) such that it matched the index date of one of the target group participants. Both the target and comparator groups had at least 365 days of prior observation and primarily resided in New York.

Outcomes of interest included a) COVID-19 infection defined as a positive COVID-19 test (e.g., reverse-transcriptase–polymerase-chain-reaction assays) or a diagnostic code of COVID-19 and b) COVID-19 hospitalization defined as an inpatient visit associated with a COVID-19 positive test or diagnosis within 30 days prior or during the visit. Upon further examination of the results, we added two other outcomes: a) COVID-19 positive test only and b) COVID-19 hospitalization associated with a positive COVID-19 test. Design overview is provided in Appendix 2; code lists and links to phenotype definitions are provided in Appendix 3.



1  
2  
3  
4  
5 For the time-at-risk, we selected six consecutive 7-day intervals after the first dose until an outcome, end  
6 of observation period or death, whichever came earlier. Additionally, given the results for vaccine  
7 effectiveness during week 1 following the first dose, we conducted chart review for patients with a  
8 COVID-19 positive test recorded in the abovementioned period. We reviewed all cases for the vaccinated  
9 population as well a random sample of the cases in the unvaccinated population.  
10  
11  
12

### 13 14 ***Sensitivity analyses*** 15

16  
17 Along with studying granular weekly intervals, we assessed overall absolute vaccine effectiveness in  
18 patients with at least one dose of a COVID-19 vaccine and in fully vaccinated patients. The latter was  
19 defined as 14 days after the second dose of Pfizer-BioNTech or Moderna vaccines or first dose of Janssen  
20 vaccine. For each comparison we estimated hazard ratios (HRs) and constructed Kaplan-Meier plots as  
21 described below.  
22  
23  
24

25  
26 Given that the published studies focused on patients without prior COVID-19 infection, our second  
27 sensitivity analysis included all eligible patients regardless of their previous COVID-19 status. Finally, as  
28 the strategy for unvaccinated group index date selection (anchoring) has been reported to influence  
29 incidence of outcomes (17), we additionally tested an unvaccinated comparator indexed on a healthcare  
30 encounter matching the index date of one of the target group participants within 3 days corridor, with at  
31 least 365 days of prior observation located at New York.  
32  
33  
34  
35  
36  
37  
38

### 39 ***Statistical methods*** 40

41  
42 For each analysis, we fitted a lasso regression model to calculate propensity score and match patients in  
43 each target and comparator group with 1:1 ratio. For propensity model we used all demographic  
44 information, index year and month, as well as the number of visits, condition and drug groups,  
45 procedures, device exposures, laboratory and instrumental tests and other observations over long (prior  
46 year) and short-term period (prior month).  
47  
48  
49  
50

51 For each outcome, we fitted a Cox proportional hazards models to estimate HRs and constructed Kaplan-  
52 Meier plots. Empirical calibration based on the negative control outcomes was used to identify and  
53 minimize any potential residual confounding by calibrating HRs and 95% confidence intervals (CIs)  
54 (18,19). Vaccine effectiveness was calculated as  $100\% \times (1 - \text{hazard ratio})$ .  
55  
56  
57  
58  
59  
60

1  
2  
3 All analyses were supported by the OHDSI Infrastructure (CohortMethod package, available  
4 at <https://ohdsi.github.io/CohortMethod/>, FeatureExtraction available at  
5 <https://ohdsi.github.io/FeatureExtraction/> and the Cyclops package for large-scale regularized regression  
6 (20) available at <https://ohdsi.github.io/Cyclops>).

### 10 ***Diagnostics***

11  
12  
13 We used multiple sources of diagnostics to estimate potential bias and confounding following best  
14 practices for evidence generation (21). First, we examined covariate and propensity score balance prior to  
15 proceeding with outcome modelling and effect estimation to ensure that we have enough sample size and  
16 to control for potential observed confounding (21). We plotted propensity scores to investigate the  
17 overlap in patient populations at the baseline and examined the balance of all baseline characteristics to  
18 determine if the target and comparator cohorts were imbalanced at the baseline and after propensity score  
19 matching. Target and comparator cohorts were said to be balanced if the standardized difference of means  
20 of all covariates after propensity score matching was less than 0.1 (22).

21  
22  
23 For negative control calibration, we used 93 negative controls (Appendix 4) with no known causal  
24 relationship with the COVID-19 vaccines. Negative controls were selected based on a review of existing  
25 literature, product labels and spontaneous reports and were reviewed by clinicians (23). We assessed  
26 residual bias from the negative control estimates.

### 34 **Patient and public involvement**

35  
36  
37 No patient involved

## 42 **RESULTS**

### 46 ***Patient characteristics***

47  
48  
49 In total, we identified 179,666 patients with at least one dose of COVID-19 vaccine: 121,771 patients for  
50 Pfizer-BioNTech, 52,728 for Moderna and 5,167 for Janssen (Table 1).

51  
52  
53 Among vaccinated patients, 68% received Pfizer-BioNTech vaccine, 29% received Moderna and 3%  
54 received Janssen vaccine. When investigating the vaccination pathways, we discovered that 112,963  
55  
56  
57  
58  
59

1  
2  
3 patients (93% of patients with at least one dose of Pfizer-BioNTech) had 2 doses of Pfizer-BioNTech and  
4 42,384 (80%) patients had 2 doses of Moderna. We found 344 and 291 patients with 3 doses of the  
5 corresponding vaccines and 440 patients having mixed Pfizer-BioNTech, Moderna and Janssen vaccines  
6 in different combinations.  
7  
8

9  
10  
11 Within our database, Moderna was administered early on with a peak in January 2021 (Figure 1), while  
12 Pfizer-BioNTech and Janssen vaccinations peaked in April. It was reflected in the follow-up time with  
13 Moderna patients having on average longer follow-up with some individuals having up to 5.8 months of  
14 post-observation.  
15  
16

17  
18  
19 We observed that unvaccinated comparator patients (Table 1) were on average younger and had fewer co-  
20 morbidities and less exposure to various drugs prior to matching. We were able to achieve balance on all  
21 covariates (up to 54,987 covariates, standardized difference of means less than 0.1) with propensity score  
22 matching. Figure 2 presents the covariate balance and propensity score balance plots showing that  
23 anchoring unvaccinated patients on a date allowed us to achieve better balance compared to anchoring  
24 patients on a visit.  
25  
26  
27

28  
29  
30 Patients vaccinated with Pfizer-BioNTech had a similar distribution of baseline characteristics compared  
31 to the patients vaccinated with Moderna but differed from the patients vaccinated with Janssen. On  
32 average, the latter group was older, had more patients with race recorded as Black, and had more co-  
33 morbidities such as diabetes mellitus or hypertensive disorder (Table 1).  
34  
35  
36

### 37 38 ***Main week-by-week absolute effectiveness analysis*** 39

40  
41 Figure 3, A shows week-by-week estimates for patients vaccinated with at least one dose of Pfizer-  
42 BioNTech or Moderna. Due to the small sample size, we were not able to obtain stable week-by-week  
43 estimates for Janssen. While week one was characterized by unexpectedly high effectiveness (58%, 95%  
44 CI 45-69% against COVID-19 infection and 72%, 95% CI 57-83% against COVID-19 associated  
45 hospitalization), we observed plausible increasing effectiveness beginning week 2 with the effectiveness  
46 on week 6 approximating 84% (95% CI 72-91%) for COVID-19 infection and 86% (95% CI 69-95) for  
47 COVID-19-associated hospitalization.  
48  
49  
50  
51

52  
53  
54 We then looked at the week one COVID-19 infection cases to explain high effectiveness. A chart review  
55 of week one positive COVID-19 tests revealed a high proportion of unvaccinated patients seeking care  
56  
57  
58  
59

1  
2  
3 related to COVID-19 symptoms or COVID-19 exposure (85% in total) compared to only 69% of  
4 vaccinated patients. Initial healthcare encounters in vaccinated population were oftentimes related to other  
5 medical reasons such as co-morbid conditions or surgeries (39% compared to 21% in unvaccinated  
6 population, Appendix 5). Moreover, an observed gap between symptom onset and an initial healthcare  
7 encounter was more pronounced in the vaccinated cohort as the patients attributed their symptoms to  
8 temporal vaccine side effects as opposed to COVID-19 infection.  
9  
10  
11  
12  
13

14 When looking at the severity of COVID-19 symptoms at the initial encounter during week one after the  
15 index date, we observed that the unvaccinated cohort had a higher proportion of asymptomatic cases  
16 (39% compared to 11%) while the vaccinated population had more severe or mild cases (34% and 48%  
17 respectively).  
18  
19  
20  
21

## 22 ***Sensitivity analysis***

### 23 *Overall effectiveness*

24  
25 As cohort analysis allows us to construct Kaplan-Meier curves to assess effectiveness over time, we also  
26 looked at the effectiveness during the year after the first dose (Figure 4). We observed similar trends with  
27 all three vaccines being less effective during the first month after the first dose. After that, Pfizer-  
28 BioNTech and Moderna were highly effective against both COVID-19 infection and COVID-19  
29 associated hospitalization, while Janssen vaccine exhibited a wide range of effectiveness (Appendix 6).  
30  
31  
32  
33  
34  
35  
36  
37

38 The results for fully vaccinated patients with time-at-risk starting at the full vaccination matched the  
39 results of the clinical trials for corresponding vaccines (detailed estimates are provided in Appendix 7 and  
40 8).  
41  
42  
43

44 Our initial design included a positive COVID-19 test or a diagnostic code as an outcome. Upon further  
45 case examination, we discovered that COVID-19 diagnostic codes in the CUIMC data were partially  
46 assigned to the patients with negative COVID-19 tests on or immediately following the date of diagnosis.  
47 In that case, ICD10CM code U07.1 “Disease caused by Severe acute respiratory syndrome coronavirus 2”  
48 was entered in the system for billing purposes (COVID-19 molecular or antibody tests) or for COVID-19  
49 sequelae. We, therefore, focused on positive COVID-19 test only for our primary outcome, which led to  
50 higher effectiveness for all vaccines compared to using both positive test and diagnosis (Appendix 6).  
51  
52  
53  
54  
55  
56  
57  
58  
59  
60

1  
2  
3 Finally, exclusion of patients with prior COVID-19 infection in our main analysis resulted in higher  
4 absolute effectiveness. Inclusion of patients regardless of their prior COVID-19 status led to a small  
5 decrease in observed effectiveness (Appendix 9) for both COVID-19 infection and hospitalization in  
6 patients vaccinated with Moderna or Janssen.  
7  
8  
9

## 10 11 **DISCUSSION** 12 13

14 In this retrospective cohort study, we examined the weekly effectiveness of COVID-19 mRNA vaccines  
15 as well as the overall effectiveness of three COVID-19 vaccines commonly used in the US. COVID-19  
16 mRNA vaccines were highly effective against both COVID-19 infection and COVID-19 associated  
17 hospitalization. Our findings support the RCTs and previously published post-marketing studies for all  
18 three vaccines. Larger sample size for patients vaccinated with COVID-19 mRNA vaccines allowed us to  
19 have more power, which resulted in overlapping yet narrower confidence intervals compared to the RCTs.  
20 On the other hand, our study had fewer patients with the Janssen vaccine, which resulted in wider yet  
21 overlapping intervals compared to the Janssen's vaccine RCT (1,2,7).  
22  
23  
24  
25  
26  
27

28 Our study complemented previous studies by examining and comparing disparate design choices such as  
29 studying both COVID-19-associated hospitalization and COVID-19 infection, different outcome  
30 definitions and broad age group (4,5). We scrutinized the effectiveness of the mRNA vaccines following  
31 the first dose and confirmed the findings of moderate vaccine effectiveness during the first two weeks.  
32 For week one following the first dose we discovered previously uncaptured differential biases in  
33 vaccinated and unvaccinated populations. Vaccination directly influenced the attitude of patients towards  
34 their symptoms, causing a delay in seeking care and a higher symptom severity threshold needed to seek  
35 care. In unvaccinated patients, mild COVID-19 related symptoms were the reason to seek care; in  
36 vaccinated patients such cases were mainly captured upon seeking outpatient and inpatient care for other  
37 conditions. Such a difference may affect any observational vaccine study that uses hospitalization as a  
38 surrogate for COVID-19 severity.  
39  
40  
41  
42  
43  
44  
45

46 Previous research suggested that vaccinated patients do not have an increase in the number of cases  
47 immediately following vaccination as they are unlikely to get vaccinated if sick (10). Our review of the  
48 cases in week one supplements this assumption by showing that vaccinated patients are more likely to  
49 attribute their symptoms to common vaccine side effects and, therefore, are less likely to seek care.  
50 Nevertheless, even when this differential bias is present, the estimates of the COVID-19 vaccine  
51 effectiveness in subsequent weeks still match the results of the RCTs. This indicates that high  
52  
53  
54  
55  
56  
57  
58  
59  
60

1  
2  
3 effectiveness during week one following vaccination does not necessarily undermine the estimates of  
4 subsequent vaccine effectiveness.  
5  
6

7  
8 Our sensitivity analyses discovered several challenges and potential biases that must be accounted for  
9 when conducting vaccine effectiveness studies on observational data. First, we observed that outcome  
10 definitions are prone to measurement error, which has not been studied thoroughly. The specifics of data  
11 capture and billing processes were associated with some patients having assigned COVID-19 diagnosis  
12 codes for billing for tests rather than as an indicator of active disease. Another reason for assigning the  
13 code was COVID-19 sequela, where the actual date of COVID-19 infection could have been anywhere  
14 from 6 months to a couple of weeks in the past. Such index date misclassification can be present in other  
15 healthcare institutions and therefore should be scrutinized to make valid inferences.  
16  
17  
18  
19

20  
21  
22 Second, inclusion or exclusion of patients with prior COVID-infection influenced estimated effectiveness.  
23 We observed that inclusion of patients with prior COVID-19 leads to lower effectiveness for all vaccines  
24 regardless of the outcome definition.  
25  
26

27  
28 If absolute effectiveness is studied, an appropriate index event (anchor) for the unvaccinated cohort must  
29 be chosen. In our study, we observed that an arbitrary date represents a better counterfactual than a  
30 medical visit for COVID-19 vaccination, which is reflected in propensity score balance and covariate  
31 balance. Nevertheless, other institutions may have different vaccination pathways such as vaccination on  
32 discharge, which can make a visit a better counterfactual for vaccination. More generally, completeness  
33 of vaccination data capture is a crucial feature that influences the robustness of the study. While CUIMC  
34 data ensures complete exposure capture by linking EHR to the City and State Registries, the researchers  
35 should exhibit caution with conducting studies on the data sources with unknown vaccination capture.  
36  
37  
38  
39  
40

41  
42 We obtained similar results to RCTs, which strengthens the conclusions about the high effectiveness of  
43 vaccines against COVID-19 infection in the broad age group. While these RCTs allowed us to make such  
44 comparisons for absolute effectiveness, there are other research questions for which RCTs may not be  
45 feasible or readily available. The US and international booster campaigns raise the question of vaccine  
46 comparative effectiveness to prioritize vaccination. An indirect comparison may not be accurate due to  
47 the differences in the populations we observed in our study. First, patients vaccinated with Janssen were  
48 substantially different from mRNA patients: on average, they were older, had a higher proportion of  
49 patients with race recorded as Black and had more comorbidities. Therefore, comparative effectiveness  
50 studies of Janssen and mRNA vaccines require robust techniques such as large-scale propensity matching  
51  
52  
53  
54  
55  
56  
57  
58  
59  
60

1  
2  
3 to ensure valid comparison. Second, while Moderna and Pfizer patients had similar baseline  
4 characteristics, the temporal distribution of vaccinations in CUIMC data differ. Moderna vaccine was  
5 administered early on in 2021 with the peak in January, while Pfizer vaccination peaked in April. Given  
6 the varying baseline COVID-19 prevalence, a comparison of mRNA vaccines requires matching patients  
7 on calendar month to account for this potential bias. These vaccines also had different administration  
8 pathways in our system. As opposed to Pfizer vaccine, which was administered at Columbia University  
9 Irving Medical Center/New York-Presbyterian sites to all patients over a prolonged period, Moderna  
10 vaccination was performed elsewhere and recorded for actively observed patients. Such patients were  
11 more likely to get tested or receive care outside of our healthcare system.  
12  
13  
14  
15  
16  
17  
18

## 19 **LIMITATIONS**

20  
21  
22 Due to observational nature of the study, the data sources may not have complete capture of patient  
23 conditions, which was mitigated by having free and available COVID-19 testing in Columbia University  
24 Irving Medical Center/New York-Presbyterian sites as well as by having data capture from New York  
25 City and State Immunization Registries. Along with availability of testing, COVID-19 baseline infection  
26 rate difference was mitigated by matching the target and comparator groups on the index date and using  
27 the index month as a covariate in propensity score model. While our outcome phenotype algorithms may  
28 be subject to measurement error, we provided additional sensitivity analyses with alternative outcome  
29 definitions.  
30  
31  
32  
33  
34  
35  
36  
37

## 38 **CONCLUSIONS**

39  
40  
41 Observational data can be used to ascertain vaccine effectiveness if potential biases such as exposure and  
42 outcome misclassification are accounted for, and appropriate anchoring event is selected. When analyzing  
43 granular vaccine effectiveness researchers need to scrutinize the data to ensure that compared groups  
44 exhibit similar health seeking behavior and are equally likely to be captured in the data. Given the  
45 difference in temporal trends of vaccine exposure and baseline characteristics, there is a need for large-  
46 scale direct comparison of vaccines to examine comparative effectiveness.  
47  
48  
49  
50  
51

## 52 **DECLARATION**

### 53 **Author contributions**

1  
2  
3  
4  
5 GH designed and supervised the study. All co-authors contributed to interpretation of the results and writing  
6 the manuscript, approved the final version and had final responsibility for the decision to submit for  
7 publication.  
8  
9

## 10 11 **Funding**

12  
13  
14 US National Library of Medicine (R01 LM006910), US Food and Drug Administration CBER BEST  
15 Initiative (75F40120D00039).  
16  
17

## 18 19 **Declaration of interests**

20  
21  
22 All authors have completed the ICMJE disclosure form (available on request from the corresponding  
23 author). GH and AO receive funding from the US National Institutes of Health (NIH) and the US Food and  
24 Drug Administration.  
25  
26  
27

## 28 29 **Ethical approval**

30  
31  
32 The protocol for this research was approved by the Columbia University Institutional Review Board  
33 (AAAO7805).  
34  
35

## 36 37 **Data sharing**

38  
39  
40 Patient-level data cannot be shared without approval from data custodians due to local information  
41 governance and data protection regulations.  
42  
43

## 44 45 **Transparency declaration**

46  
47  
48 The lead authors affirms that this manuscript is an honest, accurate, and transparent account of the study  
49 being reported; that no important aspects of the study have been omitted; and that any discrepancies from  
50 the study as planned (and, if relevant, registered) have been explained.  
51  
52

## 53 54 **Acknowledgment**



We would like to acknowledge Patrick Ryan, an employee of Janssen Research and Development, Titusville, New Jersey, for his thoughtful feedback on the study.

## REFERENCES

1. Sadoff J, Gray G, Vandebosch A, Cárdenas V, Shukarev G, Grinsztejn B, et al. Safety and Efficacy of Single-Dose Ad26.COV2.S Vaccine against Covid-19. *N Engl J Med*. 2021 Jun 10;384(23):2187–201.
2. Baden LR, El Sahly HM, Essink B, Kotloff K, Frey S, Novak R, et al. Efficacy and Safety of the mRNA-1273 SARS-CoV-2 Vaccine. *N Engl J Med*. 2021 Feb 4;384(5):403–16.
3. Polack FP, Thomas SJ, Kitchin N, Absalon J, Gurtman A, Lockhart S, et al. Safety and Efficacy of the BNT162b2 mRNA Covid-19 Vaccine. *N Engl J Med*. 2020 Dec 31;383(27):2603–15.
4. Thompson MG, Stenehjem E, Grannis S, Ball SW, Naleway AL, Ong TC, et al. Effectiveness of Covid-19 Vaccines in Ambulatory and Inpatient Care Settings. *N Engl J Med*. 2021 Sep 8;NEJMoa2110362.
5. Tartof SY, Slezak JM, Fischer H, Hong V, Ackerson BK, Ranasinghe ON, et al. Effectiveness of mRNA BNT162b2 COVID-19 vaccine up to 6 months in a large integrated health system in the USA: a retrospective cohort study. *The Lancet*. 2021 Oct;398(10309):1407–16.
6. Polinski JM, Weckstein AR, Batech M, Kabelac C, Kamath T, Harvey R, et al. Effectiveness of the Single-Dose Ad26.COV2.S COVID Vaccine [Internet]. *Infectious Diseases (except HIV/AIDS)*; 2021 Sep [cited 2021 Sep 23]. Available from: <http://medrxiv.org/lookup/doi/10.1101/2021.09.10.21263385>
7. Haas EJ, Angulo FJ, McLaughlin JM, Anis E, Singer SR, Khan F, et al. Impact and effectiveness of mRNA BNT162b2 vaccine against SARS-CoV-2 infections and COVID-19 cases, hospitalisations, and deaths following a nationwide vaccination campaign in Israel: an observational study using national surveillance data. *The Lancet*. 2021 May;397(10287):1819–29.

- 1  
2  
3 8. Kissling E, Hooiveld M, Sandonis Martín V, Martínez-Baz I, William N, Vilcu A-M, et al. Vaccine  
4 effectiveness against symptomatic SARS-CoV-2 infection in adults aged 65 years and older in  
5 primary care: I-MOVE-COVID-19 project, Europe, December 2020 to May 2021. *Eurosurveillance*  
6 [Internet]. 2021 Jul 22 [cited 2021 Sep 23];26(29). Available from:  
7 <https://www.eurosurveillance.org/content/10.2807/1560-7917.ES.2021.26.29.2100670>  
8  
9
- 10  
11 9. Lopez Bernal J, Andrews N, Gower C, Gallagher E, Simmons R, Thelwall S, et al. Effectiveness of  
12 Covid-19 Vaccines against the B.1.617.2 (Delta) Variant. *N Engl J Med*. 2021 Aug 12;385(7):585–  
13 94.  
14  
15
- 16  
17 10. Dagan N, Barda N, Kepten E, Miron O, Perchik S, Katz MA, et al. BNT162b2 mRNA Covid-19  
18 Vaccine in a Nationwide Mass Vaccination Setting. *N Engl J Med*. 2021 Apr 15;384(15):1412–23.  
19  
20
- 21  
22 11. Chemaitelly H, Yassine HM, Benslimane FM, Al Khatib HA, Tang P, Hasan MR, et al. mRNA-  
23 1273 COVID-19 vaccine effectiveness against the B.1.1.7 and B.1.351 variants and severe COVID-  
24 19 disease in Qatar. *Nat Med*. 2021 Sep;27(9):1614–21.  
25  
26
- 27  
28 12. Juno JA, Wheatley AK. Boosting immunity to COVID-19 vaccines. *Nat Med*. 2021  
29 Nov;27(11):1874–5.  
30  
31
- 32  
33 13. Dean NE, Hogan JW, Schnitzer ME. Covid-19 Vaccine Effectiveness and the Test-Negative  
34 Design. *N Engl J Med*. 2021 Oct 7;385(15):1431–3.  
35
- 36  
37 14. Skowronski D. Safety and Efficacy of the BNT162b2 mRNA Covid-19 Vaccine: a letter to the  
38 Editor. *N Engl J Med*. 2021 Feb 17;384(16):1576-.  
39
- 40  
41 15. Tabak YP, Sun X, Brennan TA, Chaguturu SK. Incidence and Estimated Vaccine Effectiveness  
42 Against Symptomatic SARS-CoV-2 Infection Among Persons Tested in US Retail Locations, May  
43 1 to August 7, 2021. *JAMA Netw Open*. 2021 Dec 22;4(12):e2143346.  
44  
45
- 46  
47 16. OMOP Common Data Model [Internet]. GitHub. [cited 2020 Feb 11]. Available from:  
48 <https://github.com/OHDSI/CommonDataModel>  
49
- 50  
51 17. Ostropelets A, Ryan PB, Schuemie MJ, Hripcsak G. Differential anchoring effects of vaccination  
52 comparator selection: characterizing a potential bias due to healthcare utilization in COVID-19  
53 versus influenza [Internet]. *Epidemiology*; 2021 Oct [cited 2021 Nov 7]. Available from:  
54 <http://medrxiv.org/lookup/doi/10.1101/2021.10.07.21264711>  
55  
56  
57  
58  
59

18. Schuemie MJ, Ryan PB, Hripcsak G, Madigan D, Suchard MA. Improving reproducibility by using high-throughput observational studies with empirical calibration. *Phil Trans R Soc A*. 2018 Sep 13;376(2128):20170356.
19. Schuemie MJ, Ryan PB, DuMouchel W, Suchard MA, Madigan D. Interpreting observational studies: why empirical calibration is needed to correct  $p$ -values. *Statistics in Medicine*. 2014 Jan 30;33(2):209–18.
20. Suchard MA, Simpson SE, Zorych I, Ryan P, Madigan D. Massive Parallelization of Serial Inference Algorithms for a Complex Generalized Linear Model. *ACM Transactions on Modeling and Computer Simulation*. 2013 Jan;23(1):1–17.
21. Schuemie MJ, Ryan PB, Pratt N, Chen R, You SC, Krumholz HM, et al. Principles of Large-scale Evidence Generation and Evaluation across a Network of Databases (LEGEND). *Journal of the American Medical Informatics Association*. 2020 Aug 1;27(8):1331–7.
22. Austin PC. Using the Standardized Difference to Compare the Prevalence of a Binary Variable Between Two Groups in Observational Research. *Communications in Statistics - Simulation and Computation*. 2009 May 14;38(6):1228–34.
23. The Knowledge Base workgroup of the Observational Health Data Sciences and Informatics (OHDSI) collaborative. Large-scale adverse effects related to treatment evidence standardization (LAERTES): an open scalable system for linking pharmacovigilance evidence sources with clinical data. *J Biomed Semant*. 2017 Dec;8(1):11.

**Figure 1.** Distribution of vaccination month for COVID-19 vaccines. Black dots represent the number of incident COVID-19 cases (defined as a positive test) in each month.

1  
2  
3 **Figure 2.** Diagnostics for the absolute effectiveness study comparing the cohort vaccinated with at least  
4 one dose of Pfizer, Moderna or Janssen COVID-19 vaccines and unvaccinated cohort anchored on a date  
5 or on a visit: (A) covariate balance before and after propensity score matching, (B) preference score  
6 balance and (C) effect of negative control calibration displaying effect estimate and standard error.  
7  
8 In (A), each dot represents the standardized difference of the means for a single covariate before and after  
9 stratification on the propensity score.  
10  
11 In (C), each blue dot is a negative control. The area below the dashed line indicates estimates with  $p < 0.05$   
12 and the orange area indicates estimates with calibrated  $p < 0.05$ .  
13  
14  
15  
16  
17  
18

19 **Figure 3.** Week-by-week estimates of vaccine effectiveness of Pfizer-BioNTech and Moderna after 1<sup>st</sup>  
20 dose, % and 95% CI for COVID-19 infection (A) and COVID-19 hospitalization (B). Chart review of  
21 COVID-19 cases (defined as a positive COVID-19 test) during week 1, vaccinated and unvaccinated  
22 patients (C).  
23  
24  
25  
26  
27

28 **Figure 4.** Kaplan-Meier curves for absolute effectiveness of COVID-19 vaccines for time-at-risk of 1 day  
29 – 365 days after the first dose compared to the unvaccinated patients residing in New York City.  
30  
31  
32  
33  
34  
35  
36  
37  
38  
39  
40  
41  
42  
43  
44  
45  
46  
47  
48  
49  
50  
51  
52  
53  
54  
55  
56  
57  
58  
59  
60

1  
2  
3  
4  
5  
6  
7  
8  
9  
10  
11  
12  
13  
14  
15  
16  
17  
18  
19  
20  
21  
22  
23  
24  
25  
26  
27  
28  
29  
30  
31  
32  
33  
34  
35  
36  
37  
38  
39  
40  
41  
42  
43  
44  
45  
46  
47

**Table 1.** Patient baseline characteristics for patients with at least one dose of a COVID-19 vaccine and the comparator unvaccinated patients, before and after propensity score matching.

| Characteristic                | Before matching |              |           |               |              |           |            |            |           | After matching |              |           |               |               |           |            |            |           |
|-------------------------------|-----------------|--------------|-----------|---------------|--------------|-----------|------------|------------|-----------|----------------|--------------|-----------|---------------|---------------|-----------|------------|------------|-----------|
|                               | Pfizer          |              |           | Moderna       |              |           | Janssen    |            |           | Pfizer         |              |           | Moderna       |               |           | Janssen    |            |           |
|                               | Target          | Comparator   | Std. diff | Target        | Comparator   | Std. diff | Target     | Comparator | Std. diff | Target         | Comparator   | Std. diff | Target        | Comparator    | Std. diff | Target     | Comparator | Std. diff |
| Patients, n                   | 121,771         | 164,997      |           | 52,728        | 148,795      |           | 5,167      | 52,643     |           | 101,109        | 101,111      |           | 50,517        | 50,517        |           | 5,031      | 5,031      |           |
| Follow-up, days. Median (IQR) | 107 (80-137)    | 104 (71-137) |           | 127 (102-153) | 123 (99-153) |           | 79 (72-95) | 79 (72-95) |           | 107 (79-140)   | 107 (79-140) |           | 126 (102-153) | 126 (102-153) |           | 79 (72-95) | 79 (72-95) |           |
| <b>Age group, %</b>           |                 |              |           |               |              |           |            |            |           |                |              |           |               |               |           |            |            |           |
| 10-19                         | 4.2             | 10.8         | 0.25      | 0.5           | 1.7          | 0.12      | 0.8        | 0.8        | 0.00      | 4.8            | 4.3          | 0.02      | 0.5           | 0.4           | 0.01      | 0.8        | 0.8        | 0.00      |
| 20-49                         | 37.2            | 42.6         | 0.11      | 35.7          | 45.7         | 0.20      | 43.9       | 43         | 0.02      | 40.3           | 40.1         | 0.03      | 36.9          | 37.4          | 0.01      | 44.2       | 43.9       | 0.01      |
| 50-64                         | 23.9            | 20.3         | 0.09      | 21.2          | 23.3         | 0.05      | 31.7       | 31.7       | 0.00      | 23.6           | 23.7         | 0.00      | 21.7          | 21.4          | 0.01      | 31.8       | 31.3       | 0.01      |
| 65-74                         | 18.8            | 12.6         | 0.17      | 21.3          | 14.4         | 0.18      | 11.6       | 12.2       | 0.02      | 15.8           | 16.6         | 0.02      | 20.6          | 20.5          | 0.00      | 11.5       | 12         | 0.02      |

|                                  |      |      |      |      |      |      |      |      |      |      |      |      |      |      |      |      |      |      |
|----------------------------------|------|------|------|------|------|------|------|------|------|------|------|------|------|------|------|------|------|------|
| 75-84                            | 11.3 | 8.9  | 0.08 | 15.4 | 10   | 0.16 | 7.6  | 7.9  | 0.01 | 10.6 | 10.7 | 0    | 14.6 | 14.6 | 0.00 | 7.2  | 7.9  | 0.03 |
| >84                              | 4.1  | 3.8  | 0.02 | 5.8  | 4.8  | 0.04 | 4.3  | 4.3  | 0.00 | 4.2  | 4.1  | 0.01 | 5.6  | 5.6  | 0.00 | 4.2  | 4    | 0.01 |
| <b>Gender, %</b>                 |      |      |      |      |      |      |      |      |      |      |      |      |      |      |      |      |      |      |
| Female                           | 63.7 | 57.8 | 0.12 | 64.4 | 58.7 | 0.12 | 63.4 | 63.2 | 0.01 | 61.4 | 62   | 0.01 | 64.2 | 64.7 | 0.01 | 63.5 | 61.1 | 0.05 |
| <b>Race, %</b>                   |      |      |      |      |      |      |      |      |      |      |      |      |      |      |      |      |      |      |
| race = Asian                     | 3.8  | 2.6  | 0.07 | 4.2  | 2.8  | 0.07 | 3.6  | 1.7  | 0.12 | 3.5  | 3.4  | 0.01 | 4.2  | 4.4  | 0.01 | 3.7  | 3.6  | 0.01 |
| race = Black or African American | 12.4 | 14.2 | 0.05 | 8.7  | 14.2 | 0.17 | 15.9 | 15.5 | 0.01 | 12.6 | 12.2 | 0.01 | 9    | 8.4  | 0.02 | 15.7 | 15.5 | 0    |
| race = White                     | 40.5 | 35.1 | 0.11 | 48.3 | 34.4 | 0.29 | 37.4 | 35.7 | 0.03 | 39.3 | 39.5 | 0    | 46.9 | 47.9 | 0.02 | 37.4 | 37.5 | 0    |
| <b>Medical history, %</b>        |      |      |      |      |      |      |      |      |      |      |      |      |      |      |      |      |      |      |
| Chronic liver disease            | 0.6  | 0.6  | 0    | 0.5  | 0.6  | 0.02 | 1.1  | 0.7  | 0.05 | 0.5  | 0.5  | 0    | 0.5  | 0.5  | 0    | 1    | 1.2  | 0.02 |
| Chronic obstructive lung disease | 1.3  | 1    | 0.02 | 1.4  | 1.1  | 0.02 | 2.4  | 1.3  | 0.09 | 1    | 1    | 0.01 | 1.2  | 1.2  | 0    | 2    | 2.2  | 0.01 |
| Dementia                         | 1.2  | 1.1  | 0    | 1    | 1.2  | 0.02 | 2.6  | 1.1  | 0.11 | 1.1  | 1    | 0.01 | 1    | 0.9  | 0.01 | 2.2  | 2.2  | 0    |
| Depressive disorder              | 5.3  | 4    | 0.06 | 4.7  | 3.9  | 0.04 | 8    | 4.8  | 0.13 | 4    | 3.7  | 0.02 | 4.2  | 4    | 0.01 | 7.1  | 8    | 0.03 |
| Diabetes mellitus                | 7.1  | 5.2  | 0.08 | 6.6  | 5.6  | 0.04 | 10.3 | 6.2  | 0.15 | 5.7  | 5.4  | 0.01 | 6.2  | 5.8  | 0.02 | 9.5  | 10.2 | 0.02 |

|                                        |          |      |          |          |      |               |          |      |          |          |      |          |          |      |          |          |      |               |
|----------------------------------------|----------|------|----------|----------|------|---------------|----------|------|----------|----------|------|----------|----------|------|----------|----------|------|---------------|
| Human immunodeficiency virus infection | 1.4      | 1.1  | 0.0<br>3 | 0.9      | 1.2  | -<br>0.0<br>3 | 1.7      | 1.4  | 0.0<br>2 | 1.1      | 1    | 0        | 0.8      | 0.8  | 0        | 1.6      | 1.8  | -<br>0.0<br>1 |
| Hyperlipidemia                         | 12.<br>9 | 8.1  | 0.1<br>6 | 14.<br>9 | 8.9  | 0.1<br>9      | 14.<br>3 | 10.2 | 0.1<br>3 | 10.<br>2 | 9.5  | 0.0<br>2 | 13       | 12.6 | 0.0<br>1 | 13.<br>4 | 14.3 | -<br>0.0<br>3 |
| Hypertensive disorder                  | 16       | 11.3 | 0.1<br>4 | 16       | 12.4 | 0.1           | 21.<br>4 | 13.8 | 0.2      | 13.<br>1 | 12.2 | 0.0<br>3 | 14.<br>7 | 13.9 | 0.0<br>2 | 20.<br>1 | 21.7 | -<br>0.0<br>4 |
| Obesity                                | 5.1      | 4.9  | 0.0<br>1 | 4        | 4.4  | -<br>0.0<br>2 | 7.3      | 5.9  | 0.0<br>6 | 4.4      | 4.1  | 0.0<br>2 | 3.8      | 3.6  | 0.0<br>1 | 6.8      | 7.8  | -<br>0.0<br>4 |
| Osteoarthritis                         | 7.3      | 4.7  | 0.1<br>1 | 7.7      | 5.3  | 0.1           | 8.4      | 6.2  | 0.0<br>8 | 5.8      | 5.3  | 0.0<br>2 | 6.8      | 6.5  | 0.0<br>1 | 7.8      | 8.8  | -<br>0.0<br>4 |
| Renal impairment                       | 3.7      | 3    | 0.0<br>4 | 3.5      | 3.3  | 0.0<br>1      | 6.6      | 3.3  | 0.1<br>5 | 2.9      | 2.7  | 0.0<br>1 | 3.3      | 3    | 0.0<br>1 | 5.3      | 5.9  | -<br>0.0<br>2 |
| Cerebrovascular disease                | 1.7      | 1.4  | 0.0<br>2 | 2.2      | 1.6  | 0.0<br>5      | 2.7      | 1.7  | 0.0<br>7 | 1.5      | 1.4  | 0.0<br>1 | 2        | 1.8  | 0.0<br>2 | 2.3      | 2.4  | -<br>0.0<br>1 |
| Heart disease                          | 8.6      | 7.1  | 0.0<br>6 | 10.<br>1 | 7.6  | 0.0<br>9      | 11.<br>8 | 8    | 0.1<br>3 | 7.5      | 7.1  | 0.0<br>2 | 9.2      | 8.7  | 0.0<br>2 | 10.<br>3 | 11.7 | -<br>0.0<br>4 |
| Malignant neoplastic disease           | 5.3      | 4.5  | 0.0<br>4 | 6.5      | 5    | 0.0<br>7      | 5        | 4.9  | 0        | 4.7      | 4.3  | 0.0<br>2 | 5.9      | 5.5  | 0.0<br>2 | 4.8      | 5.2  | -<br>0.0<br>2 |

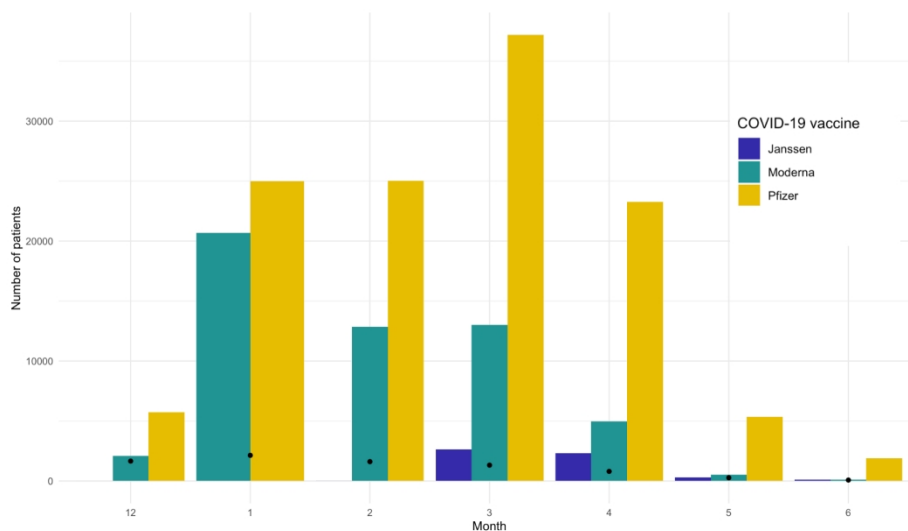

Distribution of vaccination month for COVID-19 vaccines. Black dots represent the number of incident COVID-19 cases (defined as a positive test) in each month.

338x190mm (144 x 144 DPI)



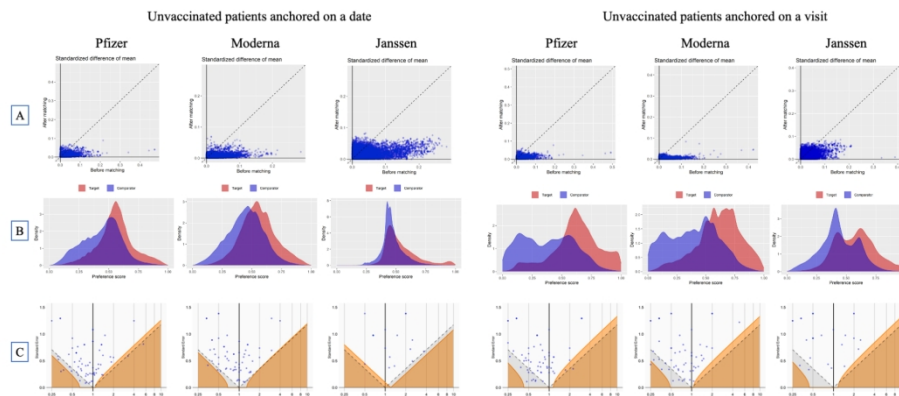

23 Diagnostics for the absolute effectiveness study comparing the cohort vaccinated with at least one dose of  
 24 Pfizer, Moderna or Janssen COVID-19 vaccines and unvaccinated cohort anchored on a date or on a visit:  
 25 (A) covariate balance before and after propensity score matching, (B) preference score balance and (C)  
 26 effect of negative control calibration displaying effect estimate and standard error.

27 In (A), each dot represents the standardized difference of the means for a single covariate before and after  
 28 stratification on the propensity score.

29 In (C), each blue dot is a negative control. The area below the dashed line indicates estimates with  $p < 0.05$   
 30 and the orange area indicates estimates with calibrated  $p < 0.05$ .

31 625x313mm (78 x 78 DPI)

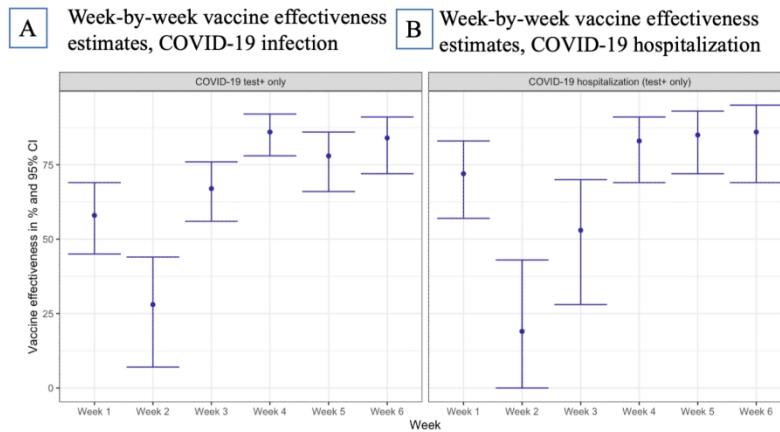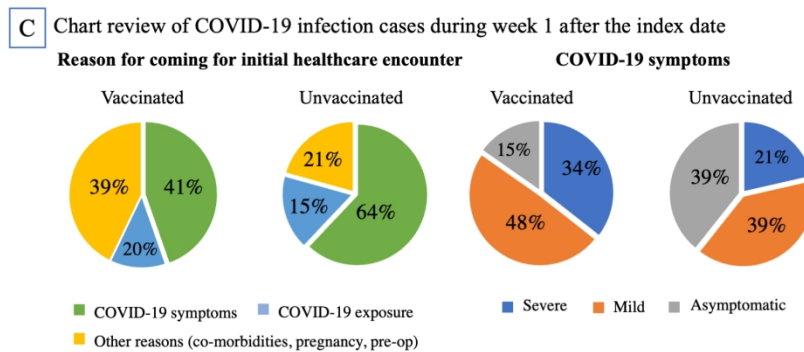

Week-by-week estimates of vaccine effectiveness of Pfizer-BioNTech and Moderna after 1st dose, % and 95% CI for COVID-19 infection (A) and COVID-19 hospitalization (B). Chart review of COVID-19 cases (defined as a positive COVID-19 test) during week 1, vaccinated and unvaccinated patients (C).

262x241mm (186 x 186 DPI)

1  
2  
3  
4  
5  
6  
7  
8  
9  
10  
11  
12  
13  
14  
15  
16  
17  
18  
19  
20  
21  
22  
23  
24  
25  
26  
27  
28  
29  
30  
31  
32  
33  
34  
35  
36  
37  
38  
39  
40  
41  
42  
43  
44  
45  
46  
47  
48  
49  
50  
51  
52  
53  
54  
55  
56  
57  
58  
59  
60

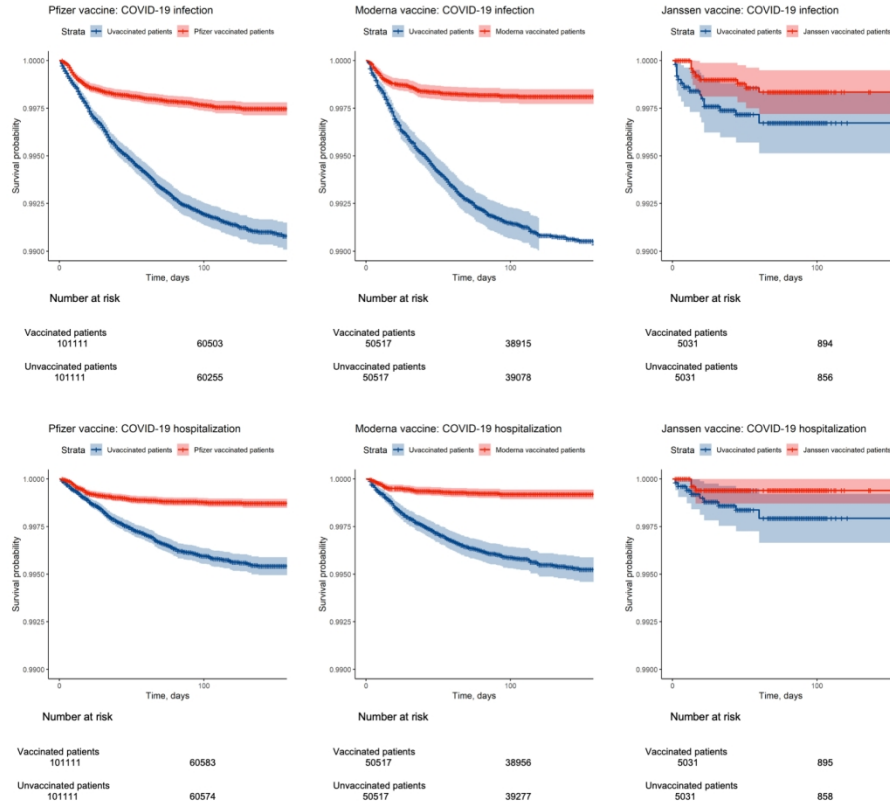

Kaplan-Meier curves for absolute effectiveness of COVID-19 vaccines for time-at-risk of 1 day – 365 days after the first dose compared to the unvaccinated patients residing in New York City.

262x241mm (186 x 186 DPI)

## Supplementary materials

### Appendix 1. Data source description

The Columbia University Irving Medical Center (CUIMC) database comprises electronic health records on more than 6 million patients, with data collection starting in 1985. CUIMC is a Northeast US quaternary care center with primary care practices in northern Manhattan and surrounding areas, and the database includes inpatient and outpatient care. The database currently holds information about the person (demographics), visits (inpatient and outpatient), conditions (billing diagnoses and problem lists), drugs (outpatient prescriptions and inpatient orders and administrations), devices, measurements (laboratory tests and vital signs), and other observations (symptoms). The data sources include current and previous electronic health record systems (homegrown Clinical Information System, homegrown WebCIS, Allscripts Sunrise Clinical Manager, Allscripts TouchWorks, Epic Systems), administrative systems (IBM PCS-ADS, Eagle Registration, IDX Systems, Epic Systems), and ancillary systems (homegrown LIS, Sunquest, Cerner Laboratory). Additionally, it contains the information on vaccination from New York City and State immunization registries.

### Appendix 2. Retrospective cohort COVID-19 vaccine effectiveness study design overview.

#### Main analysis

**Target:** patients with at least one dose (Ad26.COVID.S BNT162b2 and mRNA-1273) located in NYC  
**Comparator:** unvaccinated patients matched on the date of vaccination located in NYC

#### Sensitivity analyses

- Alternative comparator: Patients matched on the visit
- Alternative target: fully vaccinated patients
- Alternative target and comparator: patients with or without prior COVID-19
- Alternative TAR: 1 day– 365 days

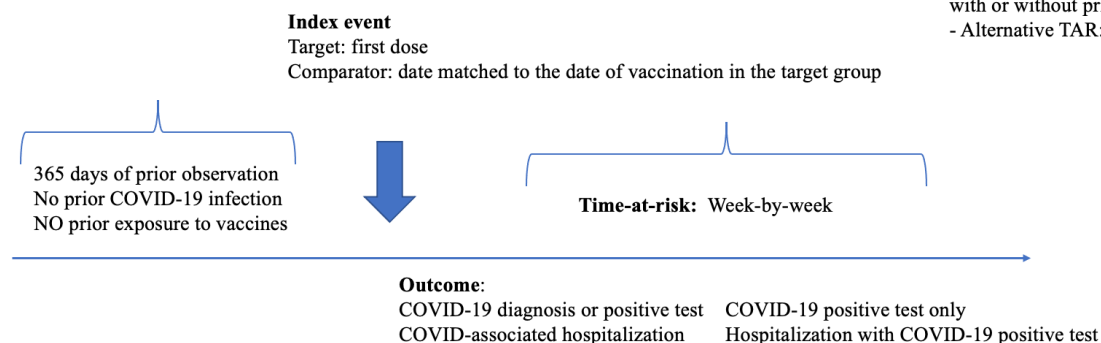

Cox proportional hazard model with 1:1 large scale propensity score matching (covariates include demographics, index year, month, # of visits; condition and drug groups; procedure, device, observation, measurement; long and short-term excluding day 0)

### Appendix 3. Cohort definitions and codes for the absolute COVID-19 vaccine effectiveness study

#### 3.1 Cohort definitions for target comparator and outcome cohorts for studying absolute effectiveness of COVID-19 vaccines.

|                    | <b>Definition and link to the public repository</b>                                                                                                                                                                                                                                                                                                                                                                                                                                                                                                                                                                                                                                                                                                                                                                                                                                                                                                                                                                                                                                                                                                                                                                                                                                                                                                                                                                                                                                                                                                                                                                                         |
|--------------------|---------------------------------------------------------------------------------------------------------------------------------------------------------------------------------------------------------------------------------------------------------------------------------------------------------------------------------------------------------------------------------------------------------------------------------------------------------------------------------------------------------------------------------------------------------------------------------------------------------------------------------------------------------------------------------------------------------------------------------------------------------------------------------------------------------------------------------------------------------------------------------------------------------------------------------------------------------------------------------------------------------------------------------------------------------------------------------------------------------------------------------------------------------------------------------------------------------------------------------------------------------------------------------------------------------------------------------------------------------------------------------------------------------------------------------------------------------------------------------------------------------------------------------------------------------------------------------------------------------------------------------------------|
| Target cohorts     | <p>Target cohorts were defined as patients with at least one dose of the corresponding vaccine (Pfizer, Moderna, Janssen)</p> <p>Index event: first exposure to the corresponding vaccine</p> <p>Inclusion and exclusion criteria:</p> <ul style="list-style-type: none"> <li>- 365 days of prior observation</li> <li>- no other COVID-19 vaccine exposure in 120 days prior and 120 days after the index date</li> <li>- no prior COVID-19 infection (diagnosis code of COVID-19 or positive test)</li> <li>- residence in New York City determined by the zip code recorded</li> </ul> <p>For the analysis on fully vaccinated patients, we applied the same criteria and required patients to have a) the second dose of Pfizer or Moderna vaccine (if applicable) within 14 to 56 days after the first dose b) at least 14 days of observation after the second dose (one dose of Janssen).</p> <p><b>Links:</b></p> <p><a href="https://atlas.ohdsi.org/#/cohortdefinition/498">https://atlas.ohdsi.org/#/cohortdefinition/498</a></p> <p><a href="https://atlas.ohdsi.org/#/cohortdefinition/494">https://atlas.ohdsi.org/#/cohortdefinition/494</a></p> <p><a href="https://atlas.ohdsi.org/#/cohortdefinition/497">https://atlas.ohdsi.org/#/cohortdefinition/497</a></p> <p><a href="https://atlas.ohdsi.org/#/cohortdefinition/418">https://atlas.ohdsi.org/#/cohortdefinition/418</a></p> <p><a href="https://atlas.ohdsi.org/#/cohortdefinition/417">https://atlas.ohdsi.org/#/cohortdefinition/417</a></p> <p><a href="https://atlas.ohdsi.org/#/cohortdefinition/420">https://atlas.ohdsi.org/#/cohortdefinition/420</a></p> |
| Comparator cohorts | <p>Comparator cohorts were created separately for each target cohort by selecting patients with no COVID-19 vaccination in their record (any vaccine), 365 days of prior observation and New York City residence. The patients were matched on the index date of one of the target group participants for the comparator anchored on a date and on the date of a healthcare encounter within 3-day corridor for the comparator anchored on a visit.</p>                                                                                                                                                                                                                                                                                                                                                                                                                                                                                                                                                                                                                                                                                                                                                                                                                                                                                                                                                                                                                                                                                                                                                                                     |

|                 |                                                                                                                                                                                                                                                                                                                                                                                                                                                                                                                                                                                                                                                                                                                                                         |
|-----------------|---------------------------------------------------------------------------------------------------------------------------------------------------------------------------------------------------------------------------------------------------------------------------------------------------------------------------------------------------------------------------------------------------------------------------------------------------------------------------------------------------------------------------------------------------------------------------------------------------------------------------------------------------------------------------------------------------------------------------------------------------------|
| Outcome cohorts | <p>For the main analysis COVID-19 infection was defined as a COVID-19 test with the result 'Positive' or 'Detected'.</p> <p>COVID-19 associated hospitalization was defined as an inpatient, emergency department or intensive care unit admission with a positive COVID-19 test recorded within 30 days prior or during hospitalization.</p> <p>For a sensitivity analysis we applied the abovementioned criteria with adding COVID-19 diagnosis as an alternative for positive COVID-19 test.</p> <p>Links:</p> <p><a href="https://atlas.ohdsi.org/#/cohortdefinition/425">https://atlas.ohdsi.org/#/cohortdefinition/425</a></p> <p><a href="https://atlas.ohdsi.org/#/cohortdefinition/422">https://atlas.ohdsi.org/#/cohortdefinition/422</a></p> |
|-----------------|---------------------------------------------------------------------------------------------------------------------------------------------------------------------------------------------------------------------------------------------------------------------------------------------------------------------------------------------------------------------------------------------------------------------------------------------------------------------------------------------------------------------------------------------------------------------------------------------------------------------------------------------------------------------------------------------------------------------------------------------------------|

### 3.2 Codes used in the study.

#### 1. Pfizer vaccine:

RxNorm 2468235 SARS-CoV-2 (COVID-19) vaccine, mRNA-BNT162b2 0.1 MG/ML  
Injectable Suspension

#### 2. Moderna vaccine:

RxNorm 2470234 SARS-CoV-2 (COVID-19) vaccine, mRNA-1273 0.2 MG/ML Injectable  
Suspension

#### 3. Janssen vaccine:

CVX 212 SARS-COV-2 (COVID-19) vaccine, vector non-replicating, recombinant spike  
protein-Ad26, preservative free, 0.5 mL

#### 4. COVID-19 diagnosis:

ICD10-CM U07.1 Emergency use of U07.1 | COVID-19

#### 5. COVID-19 test:

LOINC 94500-6 SARS-CoV-2 (COVID-19) RNA [Presence] in Respiratory specimen by NAA  
with probe detection

LOINC 94558-4 SARS-CoV-2 (COVID-19) Ag [Presence] in Respiratory specimen by Rapid  
immunoassay

1  
2  
3  
4  
5  
6  
7  
8  
9  
10  
11  
12  
13  
14  
15  
16  
17  
18  
19  
20  
21  
22  
23  
24  
25  
26  
27  
28  
29  
30  
31  
32  
33  
34  
35  
36  
37  
38  
39  
40  
41  
42  
43  
44  
45  
46  
47  
48  
49  
50  
51  
52  
53  
54  
55  
56  
57  
58  
59  
60

#### Appendix 4. Negative controls

| SNOMED concept id | SNOMED concept name                                       |
|-------------------|-----------------------------------------------------------|
| 438945            | Accidental poisoning by benzodiazepine-based tranquilizer |
| 434455            | Acquired claw toes                                        |
| 316211            | Acquired spondylolisthesis                                |
| 201612            | Alcoholic liver damage                                    |
| 438730            | Alkalosis                                                 |
| 441258            | Anemia in neoplastic disease                              |
| 432513            | Animal bite wound                                         |
| 4171556           | Ankle ulcer                                               |
| 4098292           | Antiphospholipid syndrome                                 |
| 77650             | Aseptic necrosis of bone                                  |
| 4239873           | Benign neoplasm of ciliary body                           |
| 23731             | Benign neoplasm of larynx                                 |
| 199764            | Benign neoplasm of ovary                                  |
| 195500            | Benign neoplasm of uterus                                 |
| 4145627           | Biliary calculus                                          |
| 4108471           | Burn of digit of hand                                     |
| 75121             | Burn of lower leg                                         |
| 4284982           | Calculus of bile duct without obstruction                 |
| 434327            | Cannabis abuse                                            |
| 78497             | Cellulitis and abscess of toe                             |
| 4001454           | Cervical spine ankylosis                                  |
| 4068241           | Chronic instability of knee                               |
| 195596            | Chronic pancreatitis                                      |
| 4206338           | Chronic salpingitis                                       |
| 4058397           | Claustrophobia                                            |
| 74816             | Contusion of toe                                          |
| 73302             | Curvature of spine                                        |
| 4151134           | Cyst of pancreas                                          |
| 77638             | Displacement of intervertebral disc without myelopathy    |
| 195864            | Diverticulum of bladder                                   |
| 201346            | Edema of penis                                            |
| 200461            | Endometriosis of uterus                                   |
| 377877            | Esotropia                                                 |
| 193530            | Follicular cyst of ovary                                  |
| 4094822           | Foreign body in respiratory tract                         |
| 443421            | Gallbladder and bile duct calculi                         |

|          |                                                 |
|----------|-------------------------------------------------|
| 4299408  | Gouty tophus                                    |
| 135215   | Hashimoto thyroiditis                           |
| 442190   | Hemorrhage of colon                             |
| 43020475 | High risk heterosexual behavior                 |
| 194149   | Hirschsprung's disease                          |
| 443204   | Human ehrlichiosis                              |
| 4226238  | Hyperosmolar coma due to diabetes mellitus      |
| 4032787  | Hyperosmolarity                                 |
| 197032   | Hyperplasia of prostate                         |
| 140362   | Hypoparathyroidism                              |
| 435371   | Hypothermia                                     |
| 138690   | Infestation by Pediculus                        |
| 4152376  | Intentional self poisoning                      |
| 192953   | Intestinal adhesions with obstruction           |
| 196347   | Intestinal parasitism                           |
| 137977   | Jaundice                                        |
| 317510   | Leukemia                                        |
| 765053   | Lump in right breast                            |
| 378165   | Nystagmus                                       |
| 434085   | Obstruction of duodenum                         |
| 4147016  | Open wound of buttock                           |
| 4129404  | Open wound of upper arm                         |
| 438120   | Opioid dependence                               |
| 75924    | Osteodystrophy                                  |
| 432594   | Osteomalacia                                    |
| 30365    | Panhypopituitarism                              |
| 4108371  | Peripheral gangrene                             |
| 440367   | Plasmacytosis                                   |
| 439233   | Poisoning by antidiabetic agent                 |
| 442149   | Poisoning by bee sting                          |
| 4314086  | Poisoning due to sting of ant                   |
| 4147660  | Postural kyphosis                               |
| 434319   | Premature ejaculation                           |
| 199754   | Primary malignant neoplasm of pancreas          |
| 4311499  | Primary malignant neoplasm of respiratory tract |
| 436635   | Primary malignant neoplasm of sigmoid colon     |
| 196044   | Primary malignant neoplasm of stomach           |
| 433716   | Primary malignant neoplasm of testis            |
| 133424   | Primary malignant neoplasm of thyroid gland     |



|          |                                                     |
|----------|-----------------------------------------------------|
| 194997   | Prostatitis                                         |
| 80286    | Prosthetic joint loosening                          |
| 443274   | Psychostimulant dependence                          |
| 314962   | Raynaud's disease                                   |
| 37018294 | Residual osteitis                                   |
| 4288241  | Salmonella enterica subspecies arizonae infection   |
| 45757269 | Sclerosing mesenteritis                             |
| 74722    | Secondary localized osteoarthritis of pelvic region |
| 200348   | Secondary malignant neoplasm of large intestine     |
| 43020446 | Sedative withdrawal                                 |
| 74194    | Sprain of spinal ligament                           |
| 4194207  | Tailor's bunion                                     |
| 193521   | Tropical sprue                                      |
| 40482801 | Type II diabetes mellitus uncontrolled              |
| 74719    | Ulcer of foot                                       |
| 196625   | Viral hepatitis A without hepatic coma              |
| 197494   | Viral hepatitis C                                   |
| 4284533  | Vitamin D-dependent rickets                         |

Link to the original list of negative controls used in EUMAEUS study: [https://ohdsi-studies.github.io/Eumaeus/Protocol.html#8\\_Research\\_Methods](https://ohdsi-studies.github.io/Eumaeus/Protocol.html#8_Research_Methods)

**Appendix 5.** Summary of manual chart review of COVID-19 infection cases during week 1 after the index date, patients vaccinated with mRNA vaccines and unvaccinated patients.

|                                                           | <b>Pfizer-BioNTech</b> | <b>Moderna</b> | <b>Pfizer-BioNTech and Moderna</b> | <b>Unvaccinated patients</b> |
|-----------------------------------------------------------|------------------------|----------------|------------------------------------|------------------------------|
| Total                                                     | 36                     | 25             | 61                                 | 28                           |
| Average age                                               | 65                     | 67.8           | 65.8                               | 58                           |
| <b>COVID-19 symptoms</b>                                  |                        |                |                                    |                              |
| Severe                                                    | 14 (39%)               | 7 (28%)        | 21 (34%)                           | 6 (21%)                      |
| Mild                                                      | 18 (50%)               | 11 (44%)       | 29 (48%)                           | 11 (39%)                     |
| Asymptomatic                                              | 2 (6%)                 | 7 (28%)        | 9 (15%)                            | 11 (39%)                     |
| <b>Reason for coming for initial healthcare encounter</b> |                        |                |                                    |                              |
| COVID-19 symptoms                                         | 17 (47%)               | 8 (32%)        | 25 (41%)                           | 18 (64%)                     |
| Exposure to COVID-19                                      | 3 (8%)                 | 4 (16%)        | 7 (11%)                            | 5 (18%)                      |
| For other reason (co-morbidities, procedures etc.)        | 13 (36%)               | 11 (44%)       | 24 (39%)                           | 6 (21%)                      |

| <i>Type of initial healthcare encounter</i> |          |          |          |          |
|---------------------------------------------|----------|----------|----------|----------|
| Telehealth/phone                            | 5 (14%)  | 6 (24%)  | 11 (18%) | 3 (11%)  |
| Test only                                   | 3 (8%)   | 2 (8%)   | 5 (8%)   | 6 (21%)  |
| OP                                          | 4 (11%)  | 3 (12%)  | 7 (11%)  | 1 (4%)   |
| ED or IP                                    | 24 (67%) | 14 (56%) | 38 (62%) | 18 (64%) |

**Appendix 6.** Estimates for absolute effectiveness of COVID-19 vaccines for time-at-risk of 1 day – 365 days after the first dose in the vaccinated patients without prior COVID-19 infection compared to unvaccinated patients residing in NYC.

|                        | COVID-19 infection |         | COVID-19 hospitalization |         | COVID-19 positive test only |         | COVID-19 positive test only hospitalization |         |
|------------------------|--------------------|---------|--------------------------|---------|-----------------------------|---------|---------------------------------------------|---------|
|                        | VE (95% CI), %     | P-value | VE (95% CI), %           | P-value | VE (95% CI), %              | P-value | VE (95% CI), %                              | P-value |
| <b>Pfizer-BioNTech</b> | 42 (37 – 47)       | <0.01   | 63 (56-70)               | <0.01   | 71 (66 - 75)                | <0.01   | 69 (62 - 75)                                | <0.01   |
| <b>Moderna</b>         | 54 (48 – 60)       | <0.01   | 76 (69 – 82)             | <0.01   | 78 (73 – 83)                | <0.01   | 81 (74 – 87)                                | <0.01   |
| <b>Janssen</b>         | 24 (0-55)          | 0.31    | 64 (0.1 – 1.06)          | 0.09    | 53 (0 – 82)                 | 0.1     | 70 (2 – 93)                                 | 0.08    |

**Appendix 7.** Estimates for absolute effectiveness of COVID-19 vaccines for time-at-risk of 1 day – 365 days after full vaccination in fully vaccinated patients without prior COVID-19 infection compared to unvaccinated patients residing in NYC.

|                        | COVID-19 positive test only |         | COVID-19 positive test only hospitalization |         | COVID-19 infection |         | COVID-19 hospitalization |         |
|------------------------|-----------------------------|---------|---------------------------------------------|---------|--------------------|---------|--------------------------|---------|
|                        | VE (95% CI), %              | P-value | VE (95% CI), %                              | P-value | VE (95% CI), %     | P-value | VE (95% CI), %           | P-value |
| <b>Pfizer-BioNTech</b> | 94 (91-95)                  | <0.01   | 95 (92-97)                                  | <0.01   | 70 (66-74)         | <0.01   | 88 (84-92)               | <0.01   |
| <b>Moderna</b>         | 97 (94-98)                  | <0.01   | 96 (92-99)                                  | <0.01   | 72 (66 – 77)       | <0.01   | 92 (87-95)               | <0.01   |
| <b>Janssen</b>         | 81 (50-94)                  | <0.01   | 92 (58-100)                                 | 0.03    | 55 (23 – 75)       | 0.01    | 87 (56-98)               | 0.01    |

**Appendix 8.** Comparison of the absolute effectiveness estimates in fully vaccinated patients obtained in our study and those from the randomized clinical trials of the corresponding vaccines.

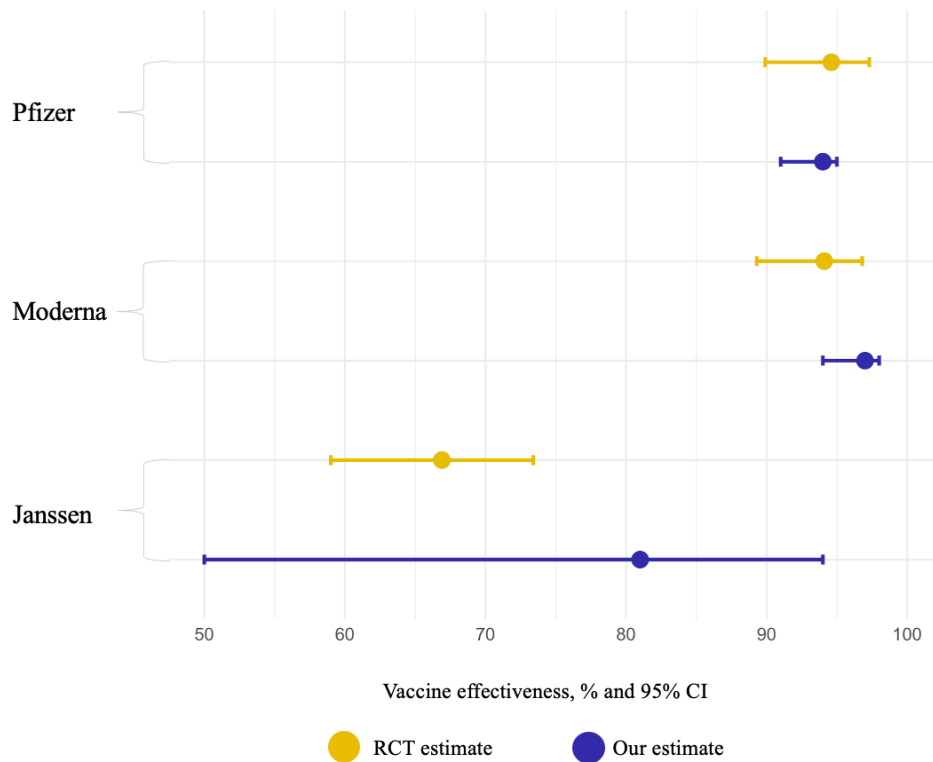

**Appendix 9.** Estimates for absolute effectiveness of COVID-19 vaccines for time-at-risk of 1 day – 365 days after the first dose in the vaccinated patients with or without prior COVID-19 infection compared to unvaccinated patients residing in NYC.

|                        | COVID-19 infection |         | COVID-19 hospitalization |         | COVID-19 positive test only |         | COVID-19 positive test only hospitalization |         |
|------------------------|--------------------|---------|--------------------------|---------|-----------------------------|---------|---------------------------------------------|---------|
|                        | VE (95% CI), %     | P-value | VE (95% CI), %           | P-value | VE (95% CI), %              | P-value | VE (95% CI), %                              | P-value |
| <b>Pfizer-BioNTech</b> | 43 (38-48)         | <0.01   | 64 (57-70)               | <0.01   | 71 (66-75)                  | <0.01   | 71(64-76)                                   | <0.01   |
| <b>Moderna</b>         | 51 (45-57)         | <0.01   | 71 (63-78)               | <0.01   | 76 (71-81)                  | <0.01   | 81 (73-86)                                  | <0.01   |
| <b>Janssen</b>         | 15 (0-49)          | 0.52    | 60 (2-86)                | 0.06    | 45 (0-75)                   | 0.12    | 63 (0-90)                                   | 0.09    |

STROBE Statement—Checklist of items that should be included in reports of *cohort studies*

|                              | Item No | Recommendation                                                                                                                                                                                                                                                                                                         | Page No                      |
|------------------------------|---------|------------------------------------------------------------------------------------------------------------------------------------------------------------------------------------------------------------------------------------------------------------------------------------------------------------------------|------------------------------|
| <b>Title and abstract</b>    | 1       | (a) Indicate the study's design with a commonly used term in the title or the abstract                                                                                                                                                                                                                                 | 2                            |
|                              |         | (b) Provide in the abstract an informative and balanced summary of what was done and what was found                                                                                                                                                                                                                    | 2                            |
| <b>Introduction</b>          |         |                                                                                                                                                                                                                                                                                                                        |                              |
| Background/rationale         | 2       | Explain the scientific background and rationale for the investigation being reported                                                                                                                                                                                                                                   | 4                            |
| Objectives                   | 3       | State specific objectives, including any prespecified hypotheses                                                                                                                                                                                                                                                       | 5                            |
| <b>Methods</b>               |         |                                                                                                                                                                                                                                                                                                                        |                              |
| Study design                 | 4       | Present key elements of study design early in the paper                                                                                                                                                                                                                                                                | 5                            |
| Setting                      | 5       | Describe the setting, locations, and relevant dates, including periods of recruitment, exposure, follow-up, and data collection                                                                                                                                                                                        | 5,6                          |
| Participants                 | 6       | (a) Give the eligibility criteria, and the sources and methods of selection of participants. Describe methods of follow-up<br>(b) For matched studies, give matching criteria and number of exposed and unexposed                                                                                                      | 5                            |
| Variables                    | 7       | Clearly define all outcomes, exposures, predictors, potential confounders, and effect modifiers. Give diagnostic criteria, if applicable                                                                                                                                                                               | 5-7                          |
| Data sources/<br>measurement | 8*      | For each variable of interest, give sources of data and details of methods of assessment (measurement). Describe comparability of assessment methods if there is more than one group                                                                                                                                   | 5                            |
| Bias                         | 9       | Describe any efforts to address potential sources of bias                                                                                                                                                                                                                                                              | 6-7                          |
| Study size                   | 10      | Explain how the study size was arrived at                                                                                                                                                                                                                                                                              | 5                            |
| Quantitative variables       | 11      | Explain how quantitative variables were handled in the analyses. If applicable, describe which groupings were chosen and why                                                                                                                                                                                           | 6-7                          |
| Statistical methods          | 12      | (a) Describe all statistical methods, including those used to control for confounding<br>(b) Describe any methods used to examine subgroups and interactions<br>(c) Explain how missing data were addressed<br>(d) If applicable, explain how loss to follow-up was addressed<br>(e) Describe any sensitivity analyses | 6-7<br>6-7<br>-<br>NA<br>6-7 |
| <b>Results</b>               |         |                                                                                                                                                                                                                                                                                                                        |                              |
| Participants                 | 13*     | (a) Report numbers of individuals at each stage of study—eg numbers potentially eligible, examined for eligibility, confirmed eligible, included in the study, completing follow-up, and analysed<br>(b) Give reasons for non-participation at each stage<br>(c) Consider use of a flow diagram                        | 7                            |
| Descriptive data             | 14*     | (a) Give characteristics of study participants (eg demographic, clinical, social) and information on exposures and potential confounders<br>(b) Indicate number of participants with missing data for each variable of interest<br>(c) Summarise follow-up time (eg, average and total amount)                         | 8,<br>18-<br>20<br><br>8, 18 |
| Outcome data                 | 15*     | Report numbers of outcome events or summary measures over time                                                                                                                                                                                                                                                         | 8                            |

|    |                          |    |                                                                                                                                                                                                              |                            |
|----|--------------------------|----|--------------------------------------------------------------------------------------------------------------------------------------------------------------------------------------------------------------|----------------------------|
| 1  | Main results             | 16 | (a) Give unadjusted estimates and, if applicable, confounder-adjusted estimates and their precision (eg, 95% confidence interval). Make clear which confounders were adjusted for and why they were included | 8, supplementary materials |
| 2  |                          |    | (b) Report category boundaries when continuous variables were categorized                                                                                                                                    |                            |
| 3  |                          |    | (c) If relevant, consider translating estimates of relative risk into absolute risk for a meaningful time period                                                                                             |                            |
| 4  | Other analyses           | 17 | Report other analyses done—eg analyses of subgroups and interactions, and sensitivity analyses                                                                                                               | 9                          |
| 5  | <b>Discussion</b>        |    |                                                                                                                                                                                                              |                            |
| 6  | Key results              | 18 | Summarise key results with reference to study objectives                                                                                                                                                     | 10                         |
| 7  | Limitations              | 19 | Discuss limitations of the study, taking into account sources of potential bias or imprecision. Discuss both direction and magnitude of any potential bias                                                   | 12                         |
| 8  | Interpretation           | 20 | Give a cautious overall interpretation of results considering objectives, limitations, multiplicity of analyses, results from similar studies, and other relevant evidence                                   | 10-12                      |
| 9  | Generalisability         | 21 | Discuss the generalisability (external validity) of the study results                                                                                                                                        | 11-12                      |
| 10 | <b>Other information</b> |    |                                                                                                                                                                                                              |                            |
| 11 | Funding                  | 22 | Give the source of funding and the role of the funders for the present study and, if applicable, for the original study on which the present article is based                                                | 13                         |

\*Give information separately for exposed and unexposed groups.

**Note:** An Explanation and Elaboration article discusses each checklist item and gives methodological background and published examples of transparent reporting. The STROBE checklist is best used in conjunction with this article (freely available on the Web sites of PLoS Medicine at <http://www.plosmedicine.org/>, Annals of Internal Medicine at <http://www.annals.org/>, and Epidemiology at <http://www.epidem.com/>). Information on the STROBE Initiative is available at <http://www.strobe-statement.org>.

# BMJ Open

## COVID-19 vaccination effectiveness rates by week and sources of bias: a retrospective cohort study

|                                 |                                                                                                                                                                                                                           |
|---------------------------------|---------------------------------------------------------------------------------------------------------------------------------------------------------------------------------------------------------------------------|
| Journal:                        | <i>BMJ Open</i>                                                                                                                                                                                                           |
| Manuscript ID                   | bmjopen-2022-061126.R1                                                                                                                                                                                                    |
| Article Type:                   | Original research                                                                                                                                                                                                         |
| Date Submitted by the Author:   | 03-Jun-2022                                                                                                                                                                                                               |
| Complete List of Authors:       | Ostropolets, Anna; Columbia University Medical Center, Department of Biomedical Informatics<br>Hripcsak, George; Columbia University Medical Center, Department of Biomedical Informatics; New York-Presbyterian Hospital |
| <b>Primary Subject Heading</b>: | Health informatics                                                                                                                                                                                                        |
| Secondary Subject Heading:      | Epidemiology, Infectious diseases, Public health                                                                                                                                                                          |
| Keywords:                       | COVID-19, Health informatics < BIOTECHNOLOGY & BIOINFORMATICS, EPIDEMIOLOGY                                                                                                                                               |
|                                 |                                                                                                                                                                                                                           |

SCHOLARONE™  
Manuscripts



I, the Submitting Author has the right to grant and does grant on behalf of all authors of the Work (as defined in the below author licence), an exclusive licence and/or a non-exclusive licence for contributions from authors who are: i) UK Crown employees; ii) where BMJ has agreed a CC-BY licence shall apply, and/or iii) in accordance with the terms applicable for US Federal Government officers or employees acting as part of their official duties; on a worldwide, perpetual, irrevocable, royalty-free basis to BMJ Publishing Group Ltd ("BMJ") its licensees and where the relevant Journal is co-owned by BMJ to the co-owners of the Journal, to publish the Work in this journal and any other BMJ products and to exploit all rights, as set out in our [licence](#).

The Submitting Author accepts and understands that any supply made under these terms is made by BMJ to the Submitting Author unless you are acting as an employee on behalf of your employer or a postgraduate student of an affiliated institution which is paying any applicable article publishing charge ("APC") for Open Access articles. Where the Submitting Author wishes to make the Work available on an Open Access basis (and intends to pay the relevant APC), the terms of reuse of such Open Access shall be governed by a Creative Commons licence – details of these licences and which [Creative Commons](#) licence will apply to this Work are set out in our licence referred to above.

Other than as permitted in any relevant BMJ Author's Self Archiving Policies, I confirm this Work has not been accepted for publication elsewhere, is not being considered for publication elsewhere and does not duplicate material already published. I confirm all authors consent to publication of this Work and authorise the granting of this licence.

1  
2  
3 1  
4  
5 2  
6 3 **COVID-19 vaccination effectiveness rates by week and sources of bias: a retrospective cohort study**  
7  
8 4

9 5 Anna Ostroplets, MD<sup>1</sup>, George Hripcsak, MD<sup>1,2</sup>  
10 6

11 7  
12 8 <sup>1</sup>Department of Biomedical Informatics, Columbia University Medical Center, New York, NY, USA

13 9  
14 10 <sup>2</sup>Medical Informatics Services, New York-Presbyterian Hospital, New York, NY, USA;  
15 11

16 12  
17 13 Corresponding author: George Hripcsak, [gh13@cumc.columbia.edu](mailto:gh13@cumc.columbia.edu), Columbia University Irving Medical  
18 14 Center, 622 West 168th Street, PH-20, New York, NY, USA  
19 15  
20 16  
21 17  
22 18  
23 19  
24 20  
25 21  
26 22  
27 23  
28 24  
29 25  
30 26  
31 27  
32 28  
33 29  
34 30  
35 31  
36 32  
37 33  
38  
39  
40  
41  
42  
43  
44  
45  
46  
47  
48  
49  
50  
51  
52  
53  
54  
55  
56  
57  
58  
59  
60



## 34 **ABSTRACT**

### 36 **Objective**

37 To examine COVID-19 vaccine effectiveness over six 7-day intervals after the first dose and assess  
38 underlying bias in observational data.

### 40 **Design and setting**

41 Retrospective cohort study using Columbia University Medical Center data linked to State and City  
42 Immunization Registries.

### 44 **Outcomes and measures**

45 We used large-scale propensity score matching with up to 54,987 covariates and fitted Cox proportional  
46 hazards models to estimate hazard ratios and constructed Kaplan-Meier plots for two main outcomes  
47 (COVID-19 infection and COVID-19-associated hospitalization). We conducted manual chart review of  
48 cases in week one in both groups along with a set of secondary analyses for other index date, outcome and  
49 population choices.

### 51 **Results**

52 The study included 179,666 patients. We observed increasing effectiveness after the first dose of mRNA  
53 vaccines with week six effectiveness approximating 84% (95% CI 72-91%) for COVID-19 infection and  
54 86% (95% CI 69-95) for COVID-19-associated hospitalization. When analyzing unexpectedly high  
55 effectiveness in week one, chart review revealed that vaccinated patients are less likely to seek care after  
56 vaccination and are more likely to be diagnosed with COVID-19 during the encounters for other  
57 conditions. Sensitivity analyses highlighted potential outcome misclassification for ICD10-CM diagnosis,  
58 the influence of excluding patients with prior COVID-19 infection and anchoring in the unexposed group.  
59 Overall vaccine effectiveness in fully vaccinated patients matched the results of the randomized trials.

### 61 **Conclusions**

62 For vaccine effectiveness studies, observational data need to be scrutinized to ensure compared groups  
63 exhibit similar health seeking behavior and are equally likely to be captured in the data. Effectiveness in  
64 the first week(s) after the vaccination should be reported even though low or high effectiveness  
65 immediately after the vaccination may not invalidate study findings. Given the difference in temporal  
66 trends of vaccine exposure and baseline characteristics, indirect comparison of vaccines may produce  
67 biased results.

1  
2  
3 **68 Strengths and limitations of this study**  
4

5  
6 69 - This study thoroughly investigates weekly COVID-19 vaccine effectiveness using methods to reduce  
7 70 potential confounding (large-scale propensity score matching, negative control calibration) and  
8 71 accompanied by manual chart review of the cases in week one  
9  
10

11  
12 72 - The study includes a range of sensitivity analyses for different patient populations, anchoring strategies  
13 73 and outcome definitions.  
14  
15

16 74 - The study was carried out using routinely collected clinical practice data, which represents real-world  
17 75 patients, but also implies a risk of misclassification.  
18  
19

20 76 **Word count:** 3179  
21

22 77 **Keywords:** COVID-19, Epidemiology, Health Informatics, Bias  
23  
24  
25  
26  
27  
28  
29  
30  
31  
32  
33  
34  
35  
36  
37  
38  
39  
40  
41  
42  
43  
44  
45  
46  
47  
48  
49  
50  
51  
52  
53  
54  
55  
56  
57  
58  
59  
60

## 99 BACKGROUND

100  
101 Randomized clinical phase-3 trials have demonstrated high efficacy for the four most commonly used  
102 COVID-19 vaccines against symptomatic COVID-19 infection, ranging from 66.9% and 70.4% for  
103 Ad26.COV2.S (Johnson & Johnson–Janssen) and ChAdOx1 (Astrazeneca) to 94.1% and 94.6% for  
104 BNT162b2 (Pfizer–BioNTech) and mRNA-1273 (Moderna) vaccines (1–4). Their rapid approval and  
105 widespread use require robust post-marketing studies that leverage large sample size, heterogeneous  
106 populations, and longer follow-up available in observational data.

107  
108 There have been recent observational studies, which have shown effectiveness similar to the randomized  
109 clinical trials (RCTs) across the globe, both test-negative and cohort (5–12), followed by studies across  
110 different patient populations, variants and number of doses (13–17).

111  
112 Nevertheless, the challenges associated with the use of observational data such as incomplete data  
113 capture, outcome misclassification and appropriate comparator sampling can undermine the results of the  
114 studies if such biases are not accounted for (18). For COVID-19 vaccines, questions associated with  
115 vaccine status misclassification (19), matching vaccinated and unvaccinated populations (6), addressing  
116 disease risk factor confounding and ascertainment bias (20,21) and others were raised.

117  
118 One of such questions is COVID-19 vaccine effectiveness during the first two weeks following the first  
119 dose. Studies have shown contradicting results for Pfizer–BioNTech vaccine with effectiveness ranging  
120 from moderate effectiveness of 52% (3) to very high effectiveness of 92.6% (22). Similarly, a recent  
121 study showed an unexplained high effectiveness of Janssen vaccine during week one (23). Other studies  
122 simply excluded the first week(s) from the time-at-risk (9,13,24–26). While week one lack of  
123 effectiveness has been suggested as a metric for lack of confounding in the long-term vaccine  
124 effectiveness studies, the reasons for high effectiveness and its impact on the validity of the conclusions  
125 regarding the overall effectiveness remain unclear (9).

126  
127 The goal of this study was to examine COVID-19 vaccine effectiveness over six 7-day intervals after the  
128 first dose to assess underlying bias associated with the use of observational data for short-term vaccine  
129 effectiveness and its impact on long-term vaccine effectiveness estimates . We employed large-scale  
130 propensity score matching and many negative controls to reduce and assess bias and leveraged a range of  
131 sensitivity analyses as well as manual review of the COVID-19 infection cases in week one to examine  
132 health-seeking behavior of vaccinated and unvaccinated patients.

1  
2  
3 1334 134 **METHODS**5 135  
6 1367 137  
8 138 *Main design*9 139  
10 140

11 138 For this retrospective observational cohort study, we used electronic health records from the Columbia  
12 139 University Irving Medical Center (CUIMC) database (Appendix 1), which has an ongoing automated  
13 140 connection to New York City and State public health department vaccine registries and includes all  
14 141 within-state vaccinations for our population. The data were translated to the OMOP Common Data Model  
15 142 version 5 and was previously used in multiple studies (27).  
16 143

17 144

18 144 For our main analysis, we studied two mRNA vaccines (Pfizer-BioNTech or Moderna). The exposed  
19 145 group included patients indexed on the first dose of one of the corresponding vaccines with no prior  
20 146 COVID-19 infection and no previous exposure to other COVID-19 vaccines. For the unexposed group,  
21 147 we selected unvaccinated patients and set their index date to a date (not necessarily with any medical  
22 148 event) that matched the index date of one of the exposed group participants. Both the exposed and  
23 149 unexposed groups had at least 365 days of prior observation and primarily resided in New York City  
24 150 according to their zip code. Patients who did not reside in New York were excluded from the study to  
25 151 ensure reliable vaccination data capture.  
26 152

27 153

28 153 Outcomes of interest included a) COVID-19 infection defined as a positive COVID-19 test (reverse-  
29 154 transcriptase–polymerase-chain-reaction assay) or a diagnostic code of COVID-19 and b) COVID-19  
30 155 hospitalization defined as an inpatient visit associated with a COVID-19 positive test or diagnosis within  
31 156 30 days prior or during the visit. Upon further examination of the results, we added two other outcomes:  
32 157 a) COVID-19 positive test only and b) COVID-19 hospitalization associated with a positive COVID-19  
33 158 test. Design overview is provided in Appendix 2; code lists and links to phenotype definitions are  
34 159 provided in Appendix 3.  
35 160

36 161

37 161 We calculated vaccine effectiveness during six consecutive 7-day intervals after the first dose. Within  
38 162 each interval, patients were followed-up until an outcome, end of the period or death, whichever came  
39 163 earlier. Additionally, given the results for vaccine effectiveness during week one following the first dose,  
40 164 we conducted chart review for patients with a COVID-19 positive test recorded in the abovementioned  
41 165 period. We reviewed all cases for the vaccinated population as well a random sample of the cases in the  
42 166 unvaccinated population and extracted main complaint, COVID-19 history, including symptoms (fever,  
43  
44  
45  
46  
47  
48  
49  
50  
51  
52  
53  
54  
55  
56  
57  
58  
59  
60

1  
2  
3 167 shortness of breath, sore throat, cough etc.), severity, time from the first symptom to encounter and  
4 168 COVID-19 exposure.

5  
6 169

7  
8 170 ***Secondary analyses***

9 171  
10  
11 172 We also conducted a set of secondary analyses. First, given that the published studies focused on patients  
12 173 without prior COVID-19 infection, we studied all eligible patients regardless of their previous COVID-19  
13 174 status.

14 175  
15  
16 176 As the strategy for unvaccinated group index date selection (anchoring) has been reported to influence  
17 177 incidence of outcomes and baseline characteristics (28,29), we additionally tested unexposed patients  
18 178 indexed on a healthcare encounter matching the index date of one of the exposed group participants  
19 179 within 3 days corridor, with at least 365 days of prior observation located at New York.

20 180  
21  
22 181 Finally, we assessed vaccine effectiveness in patients with at least one dose of a COVID-19 vaccine and  
23 182 in fully vaccinated patients over all available follow-up to compare the estimates to the results of the  
24 183 RCTs. The latter was defined as 14 days after the second dose of Pfizer-BioNTech or Moderna vaccines  
25 184 or first dose of Janssen vaccine. For each comparison we estimated hazard ratios (HRs) and constructed  
26 185 Kaplan-Meier plots as described below.

27  
28 186

29  
30  
31 187 ***Statistical methods***

32 188 For each analysis, we fitted a lasso regression model to calculate propensity score and match patients in  
33 189 each exposed and unexposed group with 1:1 ratio. For large-scale propensity score model we used all  
34 190 demographic information, index year and month, as well as the number of visits, condition and drug  
35 191 groups, procedures, device exposures, laboratory and instrumental tests and other observations over long  
36 192 (prior year) and short-term period (prior month) (30,31).

37  
38  
39 193 For each outcome, we fitted a Cox proportional hazards models to estimate HRs and constructed Kaplan-  
40 194 Meier plots. Empirical calibration based on the negative control outcomes was used to identify and  
41 195 minimize any potential residual confounding by calibrating HRs and 95% confidence intervals (CIs)  
42 196 (32,33). Vaccine effectiveness was calculated as  $100\% \times (1 - \text{hazard ratio})$ .

1  
2  
3 197 All analyses were supported by the OHDSI Infrastructure (CohortMethod package, available  
4  
5 198 at <https://ohdsi.github.io/CohortMethod/>, FeatureExtraction available at  
6  
7 199 <https://ohdsi.github.io/FeatureExtraction/> and the Cyclops package for large-scale regularized regression  
8  
9 200 (34) available at <https://ohdsi.github.io/Cyclops>).

### 10 201 ***Diagnostics***

11  
12  
13 202 We used multiple sources of diagnostics to estimate potential bias and confounding following best  
14  
15 203 practices for evidence generation (35). First, we examined covariate and propensity score balance prior to  
16  
17 204 proceeding with outcome modelling and effect estimation to ensure that we have enough sample size and  
18  
19 205 to control for potential observed confounding (35). We plotted propensity scores to investigate the  
20  
21 206 overlap in patient populations at the baseline and examined the balance of all baseline characteristics to  
22  
23 207 determine if the exposed and unexposed cohorts were imbalanced at the baseline and after propensity  
24  
25 208 score matching. Exposed and unexposed cohorts were said to be balanced if the standardized difference of  
26  
27 209 means of all covariates after propensity score matching was less than 0.1 (36).

28  
29 210 For negative control calibration, we used 93 negative controls (Appendix 4) with no known causal  
30  
31 211 relationship with the COVID-19 vaccines. Negative controls were selected based on a review of existing  
32  
33 212 literature, product labels and spontaneous reports and were reviewed by clinicians (37). We assessed  
34  
35 213 residual bias from the negative control estimates.

### 36 214 **Patient and public involvement**

37 215  
38 216 No patient involved

39 217  
40 218

## 41 219 **RESULTS**

### 42 220 43 221 ***Patient characteristics***

44 222  
45  
46 223 In total, we identified 179,666 patients with at least one dose of COVID-19 vaccine in January-May 2021:  
47  
48 224 121,771 patients for Pfizer-BioNTech, 52,728 for Moderna and 5,167 for Janssen (Table 1). The sample  
49  
50 225 included patients from all age groups, with or without co-morbidities captured in inpatient and outpatient  
51  
52 226 settings.

1  
2  
3 227 We observed that unexposed patients (Table 1) were on average younger and had fewer co-morbidities  
4 228 and less exposure to various drugs prior to matching. We were able to achieve balance on all covariates  
5 229 (up to 54,987 covariates, standardized difference of means less than 0.1) with propensity score matching.  
6  
7  
8 230 Figure 1 presents the covariate balance and propensity score balance plots showing that anchoring  
9 231 unvaccinated patients on a date allowed us to achieve better balance compared to anchoring patients on a  
10 232 visit.  
11  
12

13 233  
14 234 Patients vaccinated with Pfizer-BioNTech had a similar distribution of baseline characteristics compared  
15 235 to the patients vaccinated with Moderna but differed from the patients vaccinated with Janssen. On  
16 236 average, the latter group was older, had more patients with race recorded as Black, and had more co-  
17 237 morbidities such as diabetes mellitus or hypertensive disorder (Table 1).  
18  
19  
20

21 238  
22 239 When investigating the vaccination pathways, we discovered that 112,963 patients (93% of patients with  
23 240 at least one dose of Pfizer-BioNTech) had 2 doses of Pfizer-BioNTech and 42,384 (80%) patients had 2  
24 241 doses of Moderna. We found 344 and 291 patients with 3 doses of the corresponding vaccines and 440  
25 242 patients having mixed Pfizer-BioNTech, Moderna and Janssen vaccines in different combinations.  
26  
27  
28

29 243  
30 244 Within our database, Moderna was administered early on with a peak in January 2021 (Figure 2), while  
31 245 Pfizer-BioNTech and Janssen vaccinations peaked in April. It was reflected in the follow-up time with  
32 246 Moderna patients having on average longer follow-up with some individuals having up to 5.8 months of  
33 247 post-observation.  
34  
35

36 248

### 37 249 *Main week-by-week effectiveness analysis*

38 250

39  
40  
41 251 Figure 3 shows vaccine effectiveness over six 7-day intervals for patients vaccinated with at least one  
42 252 dose of Pfizer-BioNTech or Moderna (160,114 patients) compared to unvaccinated patients (115,689).  
43 253 Due to the small sample size, we were not able to obtain stable week-by-week estimates for Janssen.  
44  
45

46 254

47 255 While week one was characterized by unexpectedly high effectiveness (58%, 95% CI 45-69% against  
48 256 COVID-19 infection and 72%, 95% CI 57-83% against COVID-19 associated hospitalization), we  
49 257 observed plausible increasing effectiveness beginning week 2 with the effectiveness on week 6  
50 258 approximating 84% (95% CI 72-91%) for COVID-19 infection and 86% (95% CI 69-95) for COVID-19-  
51 259 associated hospitalization.  
52  
53

54 260  
55  
56  
57  
58  
59  
60

1  
2  
3 261 We then looked at the week one COVID-19 infection cases to explain high effectiveness (Figure 4). A  
4 262 chart review of week one positive COVID-19 tests revealed a high proportion of unvaccinated patients  
5 263 seeking care related to COVID-19 symptoms or COVID-19 exposure (85% in total) compared to only  
6 264 69% of vaccinated patients. Initial healthcare encounters in vaccinated population were oftentimes related  
7 265 to other medical reasons such as co-morbid conditions or surgeries (39% compared to 21% in  
8 266 unvaccinated population, Appendix 5). Moreover, an observed gap between symptom onset and an initial  
9 267 healthcare encounter was more pronounced in the vaccinated cohort as the patients attributed their  
10 268 symptoms to temporal vaccine side effects as opposed to COVID-19 infection.  
11 269

12 270 When looking at the severity of COVID-19 symptoms at the initial encounter during week one after the  
13 271 index date, we observed that the unvaccinated cohort had a higher proportion of asymptomatic cases  
14 272 (39% compared to 11%) while the vaccinated population had more severe or mild cases (34% and 48%  
15 273 respectively).  
16 274

### 17 275 *Secondary analysis*

18 276

19 277 As cohort analysis allows us to construct Kaplan-Meier curves to assess effectiveness over time, we also  
20 278 looked at the effectiveness during the year after the first dose (Appendix 6-8). We observed similar trends  
21 279 with all three vaccines being less effective during the first month after the first dose. After that, Pfizer-  
22 280 BioNTech and Moderna were highly effective against both COVID-19 infection and COVID-19  
23 281 associated hospitalization, while Janssen vaccine exhibited a wide range of effectiveness (Appendix 9).  
24 282

25 283 The results for fully vaccinated patients with time-at-risk starting at the full vaccination matched the  
26 284 results of the clinical trials for corresponding vaccines (detailed estimates are provided in Appendix 10  
27 285 and 11).  
28 286

29 287 Our initial design included a positive COVID-19 test or a diagnostic code as an outcome. Upon further  
30 288 case examination, we discovered that COVID-19 diagnostic codes in the CUIMC data were partially  
31 289 assigned to the patients with negative COVID-19 tests on or immediately following the date of diagnosis.  
32 290 In that case, ICD10CM code U07.1 “Disease caused by Severe acute respiratory syndrome coronavirus 2”  
33 291 was entered in the system for billing purposes (COVID-19 molecular or antibody tests) or for COVID-19  
34 292 sequelae. We, therefore, focused on positive COVID-19 test only for our primary outcome, which led to  
35 293 higher effectiveness for all vaccines compared to using both positive test and diagnosis (Appendix 9).  
36 294



1  
2  
3 295 Finally, exclusion of patients with prior COVID-19 infection in our main analysis resulted in higher  
4 296 effectiveness. Inclusion of patients regardless of their prior COVID-19 status led to a small decrease in  
5  
6 297 observed effectiveness (Appendix 12) for both COVID-19 infection and hospitalization in patients  
7  
8 298 vaccinated with Moderna or Janssen.

9 299

## 10 300 **DISCUSSION**

11 301

12 302 In this retrospective cohort study, we examined the effectiveness of COVID-19 mRNA vaccines over six  
13  
14 303 7-day intervals after the first dose. We scrutinized the effectiveness of the mRNA vaccines following the  
15  
16 304 first dose and confirmed the findings of moderate vaccine effectiveness during the first two weeks. For  
17  
18 305 week one following the first dose we discovered previously uncaptured differential biases in vaccinated  
19  
20 306 and unvaccinated populations resulting in high vaccine effectiveness. Other researchers suggested that the  
21  
22 307 difference between vaccinated and unvaccinated groups can be mitigated by adjusting for previous  
23  
24 308 healthcare utilization such as number of visits before baseline, co-morbidities or prior vaccination  
25  
26 309 behavior (6,13,24). Nevertheless, the confounding we observed remains even upon controlling for a large  
27  
28 310 number of covariates including those above.

29 311

30 312 Vaccination directly influenced the attitude of patients towards their symptoms, causing a delay in  
31  
32 313 seeking care and a higher symptom severity threshold needed to seek care or get tested. On contrary,  
33  
34 314 vaccinated patients in other studies had higher rates of testing compared to unvaccinated (20,38). This  
35  
36 315 indicates that patients' attitude toward risk of infection and testing may vary geographically and over  
37  
38 316 time. Similarly, frequency of testing may depend on local policies and practices.

39 317

40 318 In unvaccinated patients, mild COVID-19 related symptoms were the reason to seek care; in vaccinated  
41  
42 319 patients such cases were mainly captured upon seeking outpatient and inpatient care for other conditions.  
43  
44 320 For example, vaccinated patients could be hospitalized for elective surgery or delivery and be tested  
45  
46 321 positive for COVID-19 on the day of admission or later on. Differential symptom severity was previously  
47  
48 322 reported for other vaccines (39) and may affect any observational study that uses hospitalization as a  
49  
50 323 surrogate for COVID-19 severity as it can be hard to accurately identify the main reason for  
51  
52 324 hospitalization in structured data.

53 325

54 326 Previous research suggested that vaccinated patients do not have an increase in the number of cases  
55  
56 327 immediately following vaccination as they are unlikely to get vaccinated if sick (9,40). Our review of the

1  
2  
3 328 cases in week one adds to ‘healthy vaccinee’ effect by showing that vaccinated patients are more likely to  
4 329 attribute their symptoms to common vaccine side effects and, therefore, are less likely to seek care.

5  
6 330  
7  
8 331 Nevertheless, even when this differential bias is present, the estimates of the COVID-19 vaccine  
9 332 effectiveness in subsequent weeks still match the results of the RCTs. This indicates that high  
10 333 effectiveness during week one following vaccination does not necessarily undermine the estimates of  
11 334 subsequent vaccine effectiveness. On the other hand, we argue against using estimates of vaccine  
12 335 effectiveness within a short period after the vaccination as a negative control as the differences between  
13 336 the groups observed in this study are likely to be time-variant and may diminish over time (41).

14 337  
15  
16 338 Our secondary analyses discovered several challenges and potential biases that must be accounted for  
17 339 when conducting vaccine effectiveness studies on observational data. First, we observed that outcome  
18 340 definitions are prone to measurement error, which has not been studied thoroughly. Some of the published  
19 341 studies used ICD-10 or ICD-10(CM) codes to identify COVID-19 outcomes (42–44). We found that the  
20 342 specifics of data capture and billing processes were associated with some patients having assigned  
21 343 COVID-19 diagnosis codes for billing for tests rather than as an indicator of active disease. Another  
22 344 reason for assigning the code was COVID-19 sequela, where the actual date of COVID-19 infection could  
23 345 have been anywhere from 6 months to a couple of weeks in the past. Some researchers have previously  
24 346 reported high positive predictive value of ICD-10 diagnostic codes for COVID-19, which points out that  
25 347 index date misclassification should be scrutinized in each institution participating in the analysis to make  
26 348 valid inferences (45,46).

27 349  
28  
29 350 Second, inclusion or exclusion of patients with prior COVID-infection influenced estimated effectiveness.  
30 351 We observed that inclusion of patients with prior COVID-19 leads to lower effectiveness for all vaccines  
31 352 regardless of the outcome definition.

32 353  
33  
34 354 Third, an appropriate index event (anchor) for the unvaccinated cohort must be chosen to represent a  
35 355 counterfactual for vaccination (29,47). In our study, we confirmed that an arbitrary date represents a  
36 356 better counterfactual than a medical visit for COVID-19 vaccination, which is reflected in propensity  
37 357 score balance and covariate balance. Nevertheless, other institutions may have different vaccination  
38 358 pathways such as vaccination on discharge, which can make a visit a better counterfactual for vaccination.  
39 359 More generally, completeness of vaccination data capture is a crucial feature that influences the  
40 360 robustness of the study. While CUIMC data ensures complete exposure capture by linking EHR to the

1  
2  
3 361 City and State Registries, the researchers should exhibit caution with conducting studies on the data  
4 362 sources with unknown vaccination capture.

5 363  
6  
7 364 In general, our findings support the RCTs and previously published post-marketing studies for all three  
8 365 vaccines. Larger sample size for patients vaccinated with COVID-19 mRNA vaccines allowed us to have  
9 366 more power, which resulted in overlapping yet narrower confidence intervals compared to the RCTs. On  
10 367 the other hand, our study had fewer patients with the Janssen vaccine, which resulted in wider yet  
11 368 overlapping intervals compared to the Janssen's vaccine RCT (1,2,7). Nevertheless, an indirect  
12 369 comparison of these vaccines may not be accurate due to the differences in the populations we observed  
13 370 in our study. First, patients vaccinated with Janssen were substantially different from mRNA patients: on  
14 371 average, they were older, had a higher proportion of patients with race recorded as Black and had more  
15 372 comorbidities. Therefore, comparative effectiveness studies of Janssen and mRNA vaccines require  
16 373 robust techniques such as large-scale propensity matching to ensure valid comparison. Second, while  
17 374 Moderna and Pfizer patients had similar baseline characteristics, the temporal distribution of vaccinations  
18 375 in CUIMC data differ. Moderna vaccine was administered early on in 2021 with the peak in January,  
19 376 while Pfizer vaccination peaked in April. Given the varying baseline COVID-19 prevalence, a  
20 377 comparison of mRNA vaccines requires matching patients on calendar month to account for this potential  
21 378 bias. These vaccines also had different administration pathways in our system. As opposed to Pfizer  
22 379 vaccine, which was administered at Columbia University Irving Medical Center/New York-Presbyterian  
23 380 sites to all patients over a prolonged period, Moderna vaccination was performed elsewhere and recorded  
24 381 for actively observed patients. Such patients were more likely to get tested or receive care outside of our  
25 382 healthcare system.

26 383

## 27 384 **LIMITATIONS**

28 385

29 386 Due to observational nature of the study, the data sources may not have complete capture of patient  
30 387 conditions as the patients could seek care outside of the hospital system. While our outcome phenotype  
31 388 algorithms may be subject to measurement error, we provided additional analyses with alternative  
32 389 outcome definitions. Exposure misclassification was mitigated by having free and available COVID-19  
33 390 testing and COVID-19 vaccination in Columbia University Irving Medical Center/New York-  
34 391 Presbyterian sites as well as by having data capture from New York City and State Immunization  
35 392 Registries. Along with availability of testing, COVID-19 baseline infection rate difference was mitigated  
36 393 by matching the exposed and unexposed groups on the index date and using the index month as a  
37 394 covariate in propensity score model. We attempted to address potential differences between exposed and

1  
2  
3 395 unexposed groups by selecting a large number of covariates in our propensity score model such as  
4 396 number of visits, procedure and drug utilization, prior vaccine behavior, race and others. Nevertheless, we  
5 397 did not have data for social interactions, adherence to preventive measures and policies, which could  
6 398 affect likelihood of COVID-19 infection and testing.  
9 399

11 400 The results of the study may not be generalizable to other countries or settings with different vaccine  
12 401 administration practices and policies. Finally, the study period did not allow us to stratify the results by  
13 402 COVID-19 variants, which limits generalizability of findings to other variants.  
16 403  
17 404

## 19 405 **CONCLUSIONS**

20 406  
22 407 Observational data can be used to ascertain vaccine effectiveness if potential biases such as exposure and  
23 408 outcome misclassification are accounted for, and appropriate anchoring event is selected. When analyzing  
24 409 vaccine effectiveness researchers need to scrutinize the data to ensure that compared groups exhibit  
25 410 similar health seeking behavior and are equally likely to be captured in the data and report their findings.  
26 411 Specifically for COVID-19 vaccines, an arbitrary date for the index date in unvaccinated patients  
27 412 represents a better counterfactual for vaccination than a healthcare encounter. Effectiveness over the first  
28 413 week(s) after the vaccination should be reported even though low or high effectiveness immediately after  
29 414 the vaccination may not invalidate study findings. Given the difference in temporal trends of vaccine  
30 415 exposure and baseline characteristics, there is a need for large-scale direct comparison of vaccines to  
31 416 examine comparative effectiveness.  
38 417

## 39 418 **DECLARATION**

### 41 419 42 420 **Author contributions**

44 421  
45 422 GH designed and supervised the study. AO executed the study, interpreted the results, and drafted the  
46 423 manuscript. GH and AO reviewed the manuscript, approved the final version and had final responsibility  
47 424 for the decision to submit for publication.  
50 425

### 52 426 **Funding**

53 427  
54  
55  
56  
57  
58  
59  
60

1  
2  
3 428 US National Library of Medicine (R01 LM006910), US Food and Drug Administration CBER BEST  
4 429 Initiative (75F40120D00039).

5  
6 430

7  
8 431 **Declaration of interests**

9 432

10  
11 433 All authors have completed the ICMJE disclosure form (available on request from the corresponding  
12 434 author). GH and AO receive funding from the US National Institutes of Health (NIH) and the US Food and  
13 435 Drug Administration.  
14

15 436

16  
17 437 **Ethical approval**

18 438

19  
20 439 The protocol for this research was approved by the Columbia University Institutional Review Board  
21 440 (AAAO7805).  
22

23 441

24  
25 442 **Data sharing**

26 443

27  
28 444 Patient-level data cannot be shared without approval from data custodians due to local information  
29 445 governance and data protection regulations.  
30

31 446

32  
33 447 **Transparency declaration**

34 448

35  
36 449 The lead authors affirms that this manuscript is an honest, accurate, and transparent account of the study  
37 450 being reported; that no important aspects of the study have been omitted; and that any discrepancies from  
38 451 the study as planned (and, if relevant, registered) have been explained.  
39

40 452

41  
42 453 **Acknowledgment**

43  
44 454 We would like to acknowledge Patrick Ryan, an employee of Janssen Research and Development,  
45 455 Titusville, New Jersey, for his thoughtful feedback on the study.  
46

47 456

48 457

49 458

50 459

51 460

52 461

## 462 REFERENCES

- 463
- 464 1. Sadoff J, Gray G, Vandebosch A, Cárdenas V, Shukarev G, Grinsztejn B, et al. Safety and Efficacy  
465 of Single-Dose Ad26.COV2.S Vaccine against Covid-19. *N Engl J Med*. 2021 Jun  
466 10;384(23):2187–201.
- 467 2. Baden LR, El Sahly HM, Essink B, Kotloff K, Frey S, Novak R, et al. Efficacy and Safety of the  
468 mRNA-1273 SARS-CoV-2 Vaccine. *N Engl J Med*. 2021 Feb 4;384(5):403–16.
- 469 3. Polack FP, Thomas SJ, Kitchin N, Absalon J, Gurtman A, Lockhart S, et al. Safety and Efficacy of  
470 the BNT162b2 mRNA Covid-19 Vaccine. *N Engl J Med*. 2020 Dec 31;383(27):2603–15.
- 471 4. Voysey M, Clemens SAC, Madhi SA, Weckx LY, Folegatti PM, Aley PK, et al. Safety and efficacy  
472 of the ChAdOx1 nCoV-19 vaccine (AZD1222) against SARS-CoV-2: an interim analysis of four  
473 randomised controlled trials in Brazil, South Africa, and the UK. *The Lancet*. 2021  
474 Jan;397(10269):99–111.
- 475 5. Thompson MG, Stenehjem E, Grannis S, Ball SW, Naleway AL, Ong TC, et al. Effectiveness of  
476 Covid-19 Vaccines in Ambulatory and Inpatient Care Settings. *N Engl J Med*. 2021 Sep  
477 8;NEJMoa2110362.
- 478 6. Tartof SY, Slezak JM, Fischer H, Hong V, Ackerson BK, Ranasinghe ON, et al. Effectiveness of  
479 mRNA BNT162b2 COVID-19 vaccine up to 6 months in a large integrated health system in the  
480 USA: a retrospective cohort study. *The Lancet*. 2021 Oct;398(10309):1407–16.
- 481 7. Haas EJ, Angulo FJ, McLaughlin JM, Anis E, Singer SR, Khan F, et al. Impact and effectiveness of  
482 mRNA BNT162b2 vaccine against SARS-CoV-2 infections and COVID-19 cases, hospitalisations,  
483 and deaths following a nationwide vaccination campaign in Israel: an observational study using  
484 national surveillance data. *The Lancet*. 2021 May;397(10287):1819–29.
- 485 8. Kissling E, Hooiveld M, Sandonis Martín V, Martínez-Baz I, William N, Vilcu AM, et al. Vaccine  
486 effectiveness against symptomatic SARS-CoV-2 infection in adults aged 65 years and older in  
487 primary care: I-MOVE-COVID-19 project, Europe, December 2020 to May 2021. *Eurosurveillance*  
488 [Internet]. 2021 Jul 22 [cited 2021 Sep 23];26(29). Available from:  
489 <https://www.eurosurveillance.org/content/10.2807/1560-7917.ES.2021.26.29.2100670>
- 490 9. Dagan N, Barda N, Kepten E, Miron O, Perchik S, Katz MA, et al. BNT162b2 mRNA Covid-19  
491 Vaccine in a Nationwide Mass Vaccination Setting. *N Engl J Med*. 2021 Apr 15;384(15):1412–23.
- 492 10. Chemaitelly H, Yassine HM, Benslimane FM, Al Khatib HA, Tang P, Hasan MR, et al. mRNA-  
493 1273 COVID-19 vaccine effectiveness against the B.1.1.7 and B.1.351 variants and severe COVID-  
494 19 disease in Qatar. *Nat Med*. 2021 Sep;27(9):1614–21.
- 495 11. Lopez Bernal J, Andrews N, Gower C, Gallagher E, Simmons R, Thelwall S, et al. Effectiveness of  
496 Covid-19 Vaccines against the B.1.617.2 (Delta) Variant. *N Engl J Med*. 2021 Aug 12;385(7):585–  
497 94.
- 498 12. Bedston S, Akbari A, Jarvis CI, Lowthian E, Torabi F, North L, et al. COVID-19 vaccine uptake,  
499 effectiveness, and waning in 82,959 health care workers: A national prospective cohort study in  
500 Wales. *Vaccine*. 2022 Feb;40(8):1180–9.

- 1  
2  
3 501 13. Waxman JG, Makov-Assif M, Reis BY, Netzer D, Balicer RD, Dagan N, et al. Comparing COVID-  
4 502 19-related hospitalization rates among individuals with infection-induced and vaccine-induced  
5 503 immunity in Israel. *Nat Commun.* 2022 Dec;13(1):2202.  
6  
7 504 14. Gazit S, Shlezinger R, Perez G, Lotan R, Peretz A, Ben-Tov A, et al. The Incidence of SARS-CoV-  
8 505 2 Reinfection in Persons With Naturally Acquired Immunity With and Without Subsequent Receipt  
9 506 of a Single Dose of BNT162b2 Vaccine: A Retrospective Cohort Study. *Ann Intern Med.* 2022  
10 507 May;175(5):674–81.  
11  
12 508 15. Feikin DR, Higdon MM, Abu-Raddad LJ, Andrews N, Araos R, Goldberg Y, et al. Duration of  
13 509 effectiveness of vaccines against SARS-CoV-2 infection and COVID-19 disease: results of a  
14 510 systematic review and meta-regression. *The Lancet.* 2022 Mar;399(10328):924–44.  
15 511  
16 512 16. Tartof SY, Slezak JM, Puzniak L, Hong V, Frankland TB, Ackerson BK, et al. Effectiveness of a  
17 513 third dose of BNT162b2 mRNA COVID-19 vaccine in a large US health system: A retrospective  
18 cohort study. *The Lancet Regional Health - Americas.* 2022 May;9:100198.  
19  
20 514 17. Price AM, Olson SM, Newhams MM, Halasa NB, Boom JA, Sahni LC, et al. BNT162b2 Protection  
21 515 against the Omicron Variant in Children and Adolescents. *N Engl J Med.* 2022 May  
22 516 19;386(20):1899–909.  
23  
24 517 18. Dean NE, Hogan JW, Schnitzer ME. Covid-19 Vaccine Effectiveness and the Test-Negative  
25 518 Design. *N Engl J Med.* 2021 Oct 7;385(15):1431–3.  
26  
27 519 19. Polinski JM, Weckstein AR, Batech M, Kabelac C, Kamath T, Harvey R, et al. Effectiveness of the  
28 520 Single-Dose Ad26.COVS.S COVID Vaccine [Internet]. *Infectious Diseases (except HIV/AIDS);*  
29 521 2021 Sep [cited 2021 Sep 23]. Available from:  
30 522 <http://medrxiv.org/lookup/doi/10.1101/2021.09.10.21263385>  
31  
32 523 20. Ioannidis JPA. Factors influencing estimated effectiveness of COVID-19 vaccines in non-  
33 524 randomised studies. *BMJ EBM.* 2022 Mar 25;bmjebm-2021-111901.  
34  
35 525 21. Fell DB, Dimitris MC, Hutcheon JA, Ortiz JR, Platt RW, Regan AK, et al. Guidance for design and  
36 526 analysis of observational studies of fetal and newborn outcomes following COVID-19 vaccination  
37 527 during pregnancy. *Vaccine.* 2021 Apr;39(14):1882–6.  
38  
39 528 22. Skowronski D. Safety and Efficacy of the BNT162b2 mRNA Covid-19 Vaccine: a letter to the  
40 529 Editor. *N Engl J Med.* 2021 Feb 17;384(16):1576-.  
41  
42 530 23. Tabak YP, Sun X, Brennan TA, Chaguturu SK. Incidence and Estimated Vaccine Effectiveness  
43 531 Against Symptomatic SARS-CoV-2 Infection Among Persons Tested in US Retail Locations, May  
44 532 1 to August 7, 2021. *JAMA Netw Open.* 2021 Dec 22;4(12):e2143346.  
45  
46 533 24. Barda N, Dagan N, Cohen C, Hernán MA, Lipsitch M, Kohane IS, et al. Effectiveness of a third  
47 534 dose of the BNT162b2 mRNA COVID-19 vaccine for preventing severe outcomes in Israel: an  
48 535 observational study. *The Lancet.* 2021 Dec;398(10316):2093–100.  
49  
50 536 25. Hall VJ, Foulkes S, Saei A, Andrews N, Oguti B, Charlett A, et al. COVID-19 vaccine coverage in  
51 537 health-care workers in England and effectiveness of BNT162b2 mRNA vaccine against infection  
52 538 (SIREN): a prospective, multicentre, cohort study. *The Lancet.* 2021 May;397(10286):1725–35.  
53  
54  
55  
56  
57  
58  
59  
60

- 1  
2  
3 539 26. Pilishvili T, Gierke R, Fleming-Dutra KE, Farrar JL, Mohr NM, Talan DA, et al. Effectiveness of  
4 540 mRNA Covid-19 Vaccine among U.S. Health Care Personnel. *N Engl J Med*. 2021 Dec  
5 541 16;385(25):e90.  
6  
7 542 27. OMOP Common Data Model [Internet]. GitHub. [cited 2020 Feb 11]. Available from:  
8 543 <https://github.com/OHDSI/CommonDataModel>  
9  
10 544 28. Ostropolets A, Ryan P, Schuemie M, Hripcsak G. Differential anchoring effects of vaccination  
11 545 comparator selection: characterizing a potential bias due to healthcare utilization in COVID-19  
12 546 versus influenza (Preprint). *JMIR Public Health and Surveillance* [Internet]. 2021 Aug 24 [cited  
13 547 2022 May 30]; Available from: <http://preprints.jmir.org/preprint/33099/accepted>  
14  
15 548 29. Ostropolets A, Li X, Makadia R, Rao G, Rijnbeek PR, Duarte-Salles T, et al. Factors Influencing  
16 549 Background Incidence Rate Calculation: Systematic Empirical Evaluation Across an International  
17 550 Network of Observational Databases. *Front Pharmacol*. 2022 Apr 26;13:814198.  
18  
19 551 30. Tian Y, Schuemie MJ, Suchard MA. Evaluating large-scale propensity score performance through  
20 552 real-world and synthetic data experiments. *International Journal of Epidemiology*. 2018 Dec  
21 553 1;47(6):2005–14.  
22  
23 554 31. Fortin SP, Johnston SS, Schuemie MJ. Applied comparison of large-scale propensity score  
24 555 matching and cardinality matching for causal inference in observational research. *BMC Med Res*  
25 556 *Methodol*. 2021 Dec;21(1):174.  
26  
27 557 32. Schuemie MJ, Ryan PB, Hripcsak G, Madigan D, Suchard MA. Improving reproducibility by using  
28 558 high-throughput observational studies with empirical calibration. *Phil Trans R Soc A*. 2018 Sep  
29 559 13;376(2128):20170356.  
30  
31 560 33. Schuemie MJ, Ryan PB, DuMouchel W, Suchard MA, Madigan D. Interpreting observational  
32 561 studies: why empirical calibration is needed to correct  $p$ -values. *Statistics in Medicine*. 2014 Jan  
33 562 30;33(2):209–18.  
34  
35 563 34. Suchard MA, Simpson SE, Zorych I, Ryan P, Madigan D. Massive Parallelization of Serial  
36 564 Inference Algorithms for a Complex Generalized Linear Model. *ACM Transactions on Modeling*  
37 565 *and Computer Simulation*. 2013 Jan;23(1):1–17.  
38  
39 566 35. Schuemie MJ, Ryan PB, Pratt N, Chen R, You SC, Krumholz HM, et al. Principles of Large-scale  
40 567 Evidence Generation and Evaluation across a Network of Databases (LEGEND). *Journal of the*  
41 568 *American Medical Informatics Association*. 2020 Aug 1;27(8):1331–7.  
42  
43 569 36. Austin PC. Using the Standardized Difference to Compare the Prevalence of a Binary Variable  
44 570 Between Two Groups in Observational Research. *Communications in Statistics - Simulation and*  
45 571 *Computation*. 2009 May 14;38(6):1228–34.  
46  
47 572 37. The Knowledge Base workgroup of the Observational Health Data Sciences and Informatics  
48 573 (OHDSI) collaborative. Large-scale adverse effects related to treatment evidence standardization  
49 574 (LAERTES): an open scalable system for linking pharmacovigilance evidence sources with clinical  
50 575 data. *J Biomed Semant*. 2017 Dec;8(1):11.  
51  
52 576 38. Glasziou P, McCaffery K, Cvejic E, Batcup C, Ayre J, Pickles K, et al. Testing behaviour may bias  
53 577 observational studies of vaccine effectiveness [Internet]. *Infectious Diseases (except HIV/AIDS)*;  
54  
55  
56  
57  
58  
59  
60



- 1  
2  
3 578 2022 Jan [cited 2022 May 26]. Available from:  
4 579 <http://medrxiv.org/lookup/doi/10.1101/2022.01.17.22269450>  
5
- 6 580 39. Lewnard JA, Tedijanto C, Cowling BJ, Lipsitch M. Measurement of Vaccine Direct Effects Under  
7 581 the Test-Negative Design. *American Journal of Epidemiology*. 2018 Dec 1;187(12):2686–97.  
8
- 9 582 40. Renschmidt C, Wichmann O, Harder T. Frequency and impact of confounding by indication and  
10 583 healthy vaccinee bias in observational studies assessing influenza vaccine effectiveness: a  
11 584 systematic review. *BMC Infect Dis*. 2015 Dec;15(1):429.  
12
- 13 585 41. Hitchings MDT, Lewnard JA, Dean NE, Ko AI, Ranzani OT, Andrews JR, et al. Use of recently  
14 586 vaccinated individuals to detect bias in test-negative case–control studies of COVID-19 vaccine  
15 587 effectiveness. *Epidemiology [Internet]*. 2022 Apr 1 [cited 2022 May 27];Publish Ahead of Print.  
16 588 Available from: <https://journals.lww.com/10.1097/EDE.0000000000001484>  
17
- 18 589 42. Hadi YB, Thakkar S, Shah-Khan SM, Hutson W, Sarwari A, Singh S. COVID-19 Vaccination Is  
19 590 Safe and Effective in Patients With Inflammatory Bowel Disease: Analysis of a Large Multi-  
20 591 institutional Research Network in the United States. *Gastroenterology*. 2021 Oct;161(4):1336-  
21 592 1339.e3.  
22
- 23 593 43. Nunes B, Rodrigues AP, Kislava I, Cruz C, Peralta-Santos A, Lima J, et al. mRNA vaccine  
24 594 effectiveness against COVID-19-related hospitalisations and deaths in older adults: a cohort study  
25 595 based on data linkage of national health registries in Portugal, February to August 2021.  
26 596 *Eurosurveillance [Internet]*. 2021 Sep 23 [cited 2022 May 25];26(38). Available from:  
27 597 <https://www.eurosurveillance.org/content/10.2807/1560-7917.ES.2021.26.38.2100833>  
28  
29
- 30 598 44. Wright BJ, Tideman S, Diaz GA, French T, Parsons GT, Robicsek A. Comparative vaccine  
31 599 effectiveness against severe COVID-19 over time in US hospital administrative data: a case-control  
32 600 study. *The Lancet Respiratory Medicine*. 2022 Feb;S221326002200042X.  
33
- 34 601 45. Bodilsen J, Leth S, Nielsen SL, Holler JG, Benfield T, Omland LH. Positive Predictive Value of  
35 602 ICD-10 Diagnosis Codes for COVID-19. *CLEP*. 2021 May;Volume 13:367–72.  
36
- 37 603 46. Lynch KE, Viernes B, Gatsby E, DuVall SL, Jones BE, Box TL, et al. Positive Predictive Value of  
38 604 COVID-19 ICD-10 Diagnosis Codes Across Calendar Time and Clinical Setting. *CLEP*. 2021  
39 605 Oct;Volume 13:1011–8.  
40
- 41 606 47. Ostropolets A, Ryan PB, Schuemie MJ, Hripcsak G. Differential anchoring effects of vaccination  
42 607 comparator selection: characterizing a potential bias due to healthcare utilization in COVID-19  
43 608 versus influenza [Internet]. *Epidemiology*; 2021 Oct [cited 2021 Nov 7]. Available from:  
44 609 <http://medrxiv.org/lookup/doi/10.1101/2021.10.07.21264711>  
45  
46

610

611

612

613

614

615

1  
2  
3 616  
4  
5 617 **Figure 1.** Distribution of vaccination month for COVID-19 vaccines. Black dots represent the number of  
6 618 incident COVID-19 cases (defined as a positive test) in each month.  
7  
8 619

9 620 **Figure 2.** Diagnostics for the effectiveness study comparing the cohort vaccinated with at least one dose  
10 621 of Pfizer, Moderna or Janssen COVID-19 vaccines and unvaccinated cohort anchored on a date or on a  
11 622 visit: (A) covariate balance before and after propensity score matching, (B) preference score balance and  
12 623 (C) effect of negative control calibration displaying effect estimate and standard error.

13  
14 624 In (A), each dot represents the standardized difference of the means for a single covariate before and after  
15 625 stratification on the propensity score.

16 626 In (C), each blue dot is a negative control. The area below the dashed line indicates estimates with  $p < 0.05$   
17 627 and the orange area indicates estimates with calibrated  $p < 0.05$ .  
18 628

19 629 **Figure 3.** Effectiveness of Pfizer-BioNTech and Moderna vaccines over six 7-day intervals after 1<sup>st</sup> dose,  
20 630 % and 95% CI for COVID-19 infection (A) and COVID-19 hospitalization (B).  
21 631

22 632 **Figure 4.** Chart review of COVID-19 cases (defined as a positive COVID-19 test) during week one,  
23 633 vaccinated and unvaccinated patients.  
24 634  
25 635

**Table 1.** Patient baseline characteristics for patients with at least one dose of a COVID-19 vaccine and the unexposed patients, before and after propensity score matching.

| Characteristic                                  | Before matching |              |           | After matching |              |           |
|-------------------------------------------------|-----------------|--------------|-----------|----------------|--------------|-----------|
|                                                 | Target          | Comparator   | Std. diff | Target         | Comparator   | Std. diff |
| <i>Pfizer-BioNTech COVID-19 vaccine</i>         |                 |              |           |                |              |           |
| Patients, n                                     | 121,771         | 164,997      |           | 101,109        | 101,111      |           |
| Follow-up, days. Median (IQR)                   | 107 (80 – 137)  | 104 (71-137) |           | 107 (78-149)   | 107 (79-140) |           |
| COVID-19 diagnosis or positive COVID-19 test, n |                 |              |           | 822            | 1355         |           |
| Positive COVID-19 test, n                       |                 |              |           | 231            | 786          |           |
| <i>Age group, %</i>                             |                 |              |           |                |              |           |
| 10-19                                           | 4.2             | 10.8         | -0.25     | 4.8            | 4.3          | 0.02      |
| 20-49                                           | 37.2            | 42.6         | -0.11     | 40.3           | 40.1         | 0         |
| 50-64                                           | 23.9            | 20.3         | 0.09      | 23.6           | 23.7         | 0         |
| 65-74                                           | 18.8            | 12.6         | 0.17      | 15.8           | 16.6         | -0.02     |
| 75-84                                           | 11.3            | 8.9          | 0.08      | 10.6           | 10.7         | 0         |
| >84                                             | 4.1             | 3.8          | 0.02      | 4.2            | 4.1          | 0.01      |
| <i>Gender, %</i>                                |                 |              |           |                |              |           |
| Female                                          | 63.7            | 57.8         | 0.12      | 61.4           | 62           | -0.01     |
| <i>Race, %</i>                                  |                 |              |           |                |              |           |
| race = Asian                                    | 3.8             | 2.6          | 0.07      | 3.5            | 3.4          | 0.01      |
| race = Black or African American                | 12.4            | 14.2         | -0.05     | 12.6           | 12.2         | 0.01      |
| race = White                                    | 40.5            | 35.1         | 0.11      | 39.3           | 39.5         | 0         |
| <i>Medical history, %</i>                       |                 |              |           |                |              |           |
| Chronic liver disease                           | 0.6             | 0.6          | 0         | 0.5            | 0.5          | 0         |
| Chronic obstructive lung disease                | 1.3             | 1            | 0.02      | 1              | 1            | 0.01      |
| Dementia                                        | 1.2             | 1.1          | 0         | 1.1            | 1            | 0.01      |

|                                                 |                 |              |       |                |               |       |
|-------------------------------------------------|-----------------|--------------|-------|----------------|---------------|-------|
| Depressive disorder                             | 5.3             | 4            | 0.06  | 4              | 3.7           | 0.02  |
| Diabetes mellitus                               | 7.1             | 5.2          | 0.08  | 5.7            | 5.4           | 0.01  |
| Human immunodeficiency virus infection          | 1.4             | 1.1          | 0.03  | 1.1            | 1             | 0     |
| Hyperlipidemia                                  | 12.9            | 8.1          | 0.16  | 10.2           | 9.5           | 0.02  |
| Hypertensive disorder*                          | 16              | 11.3         | 0.14  | 13.1           | 12.2          | 0.03  |
| Obesity                                         | 5.1             | 4.9          | 0.01  | 4.4            | 4.1           | 0.02  |
| Osteoarthritis                                  | 7.3             | 4.7          | 0.11  | 5.8            | 5.3           | 0.02  |
| Renal impairment**                              | 3.7             | 3            | 0.04  | 2.9            | 2.7           | 0.01  |
| Cerebrovascular disease                         | 1.7             | 1.4          | 0.02  | 1.5            | 1.4           | 0.01  |
| Heart disease***                                | 8.6             | 7.1          | 0.06  | 7.5            | 7.1           | 0.02  |
| Malignant neoplastic disease                    | 5.3             | 4.5          | 0.04  | 4.7            | 4.3           | 0.02  |
| Charlson comorbidity index, mean (SD)           | 1.75 (3.18)     | 1.69 (3.09)  | -0.01 | 1.70 (3.11)    | 1.63 (3.03)   | -0.01 |
| Influenza vaccination within a year prior       | 10.9            | 7.9          | 0.10  | 7.5            | 6.9           | 0.02  |
| <b>Moderna COVID-19 vaccine</b>                 |                 |              |       |                |               |       |
| Patients, n                                     | 52,728          | 148,795      |       | 50,517         | 50,517        |       |
| Follow-up, days. Median (IQR)                   | 127 (102 – 153) | 123 (99-153) |       | 126 (101- 153) | 126 (102-153) |       |
| COVID-19 diagnosis or positive COVID-19 test, n |                 |              |       | 382            | 786           |       |
| Positive COVID-19 test, n                       |                 |              |       | 94             | 447           |       |
| <b>Age group, %</b>                             |                 |              |       |                |               |       |
| 10-19                                           | 0.5             | 1.7          | -0.12 | 0.5            | 0.4           | 0.01  |
| 20-49                                           | 35.7            | 45.7         | -0.20 | 36.9           | 37.4          | -0.01 |
| 50-64                                           | 21.2            | 23.3         | -0.05 | 21.7           | 21.4          | 0.01  |
| 65-74                                           | 21.3            | 14.4         | 0.18  | 20.6           | 20.5          | 0.00  |
| 75-84                                           | 15.4            | 10           | 0.16  | 14.6           | 14.6          | 0.00  |
| >84                                             | 5.8             | 4.8          | 0.04  | 5.6            | 5.6           | 0.00  |
| <b>Gender, %</b>                                |                 |              |       |                |               |       |
| Female                                          | 64.4            | 58.7         | 0.12  | 64.2           | 64.7          | -0.01 |

|                                                 |             |             |       |             |             |       |
|-------------------------------------------------|-------------|-------------|-------|-------------|-------------|-------|
| <i>Race, %</i>                                  |             |             |       |             |             |       |
| race = Asian                                    | 4.2         | 2.8         | 0.07  | 4.2         | 4.4         | -0.01 |
| race = Black or African American                | 8.7         | 14.2        | -0.17 | 9           | 8.4         | 0.02  |
| race = White                                    | 48.3        | 34.4        | 0.29  | 46.9        | 47.9        | -0.02 |
| <i>Medical history, %</i>                       |             |             |       |             |             |       |
| Chronic liver disease                           | 0.5         | 0.6         | -0.02 | 0.5         | 0.5         | 0     |
| Chronic obstructive lung disease                | 1.4         | 1.1         | 0.02  | 1.2         | 1.2         | 0     |
| Dementia                                        | 1           | 1.2         | -0.02 | 1           | 0.9         | 0.01  |
| Depressive disorder                             | 4.7         | 3.9         | 0.04  | 4.2         | 4           | 0.01  |
| Diabetes mellitus                               | 6.6         | 5.6         | 0.04  | 6.2         | 5.8         | 0.02  |
| Human immunodeficiency virus infection          | 0.9         | 1.2         | -0.03 | 0.8         | 0.8         | 0     |
| Hyperlipidemia                                  | 14.9        | 8.9         | 0.19  | 13          | 12.6        | 0.01  |
| Hypertensive disorder                           | 16          | 12.4        | 0.1   | 14.7        | 13.9        | 0.02  |
| Obesity                                         | 4           | 4.4         | -0.02 | 3.8         | 3.6         | 0.01  |
| Osteoarthritis                                  | 7.7         | 5.3         | 0.1   | 6.8         | 6.5         | 0.01  |
| Renal impairment                                | 3.5         | 3.3         | 0.01  | 3.3         | 3           | 0.01  |
| Cerebrovascular disease                         | 2.2         | 1.6         | 0.05  | 2           | 1.8         | 0.02  |
| Heart disease                                   | 10.1        | 7.6         | 0.09  | 9.2         | 8.7         | 0.02  |
| Malignant neoplastic disease                    | 6.5         | 5           | 0.07  | 5.9         | 5.5         | 0.02  |
| Charlson comorbidity index, mean (SD)           | 1.62 (2.81) | 1.62 (3.00) | 0.00  | 1.59 (2.80) | 1.59 (2.99) | 0.00  |
| Influenza vaccination within a year prior       | 8.4         | 6.3         | 0.08  | 7.2         | 6.8         | 0.02  |
| <b><i>Janssen COVID-19 vaccine</i></b>          |             |             |       |             |             |       |
| Patients, n                                     | 5,167       | 52,643      |       | 5,031       | 5,031       |       |
| Follow-up, days. Median (IQR)                   | 79 (72-95)  | 79 (72-95)  |       | 79 (72-95)  | 79 (72-95)  |       |
| COVID-19 diagnosis or positive COVID-19 test, n |             |             |       | 31          | 37          |       |
| Positive COVID-19 test, n                       |             |             |       | 8           | 16          |       |
| <i>Age group, %</i>                             |             |             |       |             |             |       |

|                                        |             |             |       |             |             |       |
|----------------------------------------|-------------|-------------|-------|-------------|-------------|-------|
| 10-19                                  | 0.8         | 0.8         | 0.00  | 0.8         | 0.8         | 0.00  |
| 20-49                                  | 43.9        | 43          | 0.02  | 44.2        | 43.9        | 0.01  |
| 50-64                                  | 31.7        | 31.7        | 0.00  | 31.8        | 31.3        | 0.01  |
| 65-74                                  | 11.6        | 12.2        | -0.02 | 11.5        | 12          | -0.02 |
| 75-84                                  | 7.6         | 7.9         | -0.01 | 7.2         | 7.9         | -0.03 |
| >84                                    | 4.3         | 4.3         | 0.00  | 4.2         | 4           | 0.01  |
| <i>Gender, %</i>                       |             |             |       |             |             |       |
| Female                                 | 63.4        | 63.2        | 0.01  | 63.5        | 61.1        | 0.05  |
| <i>Race, %</i>                         |             |             |       |             |             |       |
| race = Asian                           | 3.6         | 1.7         | 0.12  | 3.7         | 3.6         | 0.01  |
| race = Black or African American       | 15.9        | 15.5        | 0.01  | 15.7        | 15.5        | 0     |
| race = White                           | 37.4        | 35.7        | 0.03  | 37.4        | 37.5        | 0     |
| <i>Medical history, %</i>              |             |             |       |             |             |       |
| Chronic liver disease                  | 1.1         | 0.7         | 0.05  | 1           | 1.2         | -0.02 |
| Chronic obstructive lung disease       | 2.4         | 1.3         | 0.09  | 2           | 2.2         | -0.01 |
| Dementia                               | 2.6         | 1.1         | 0.11  | 2.2         | 2.2         | 0     |
| Depressive disorder                    | 8           | 4.8         | 0.13  | 7.1         | 8           | -0.03 |
| Diabetes mellitus                      | 10.3        | 6.2         | 0.15  | 9.5         | 10.2        | -0.02 |
| Human immunodeficiency virus infection | 1.7         | 1.4         | 0.02  | 1.6         | 1.8         | -0.01 |
| Hyperlipidemia                         | 14.3        | 10.2        | 0.13  | 13.4        | 14.3        | -0.03 |
| Hypertensive disorder                  | 21.4        | 13.8        | 0.2   | 20.1        | 21.7        | -0.04 |
| Obesity                                | 7.3         | 5.9         | 0.06  | 6.8         | 7.8         | -0.04 |
| Osteoarthritis                         | 8.4         | 6.2         | 0.08  | 7.8         | 8.8         | -0.04 |
| Renal impairment                       | 6.6         | 3.3         | 0.15  | 5.3         | 5.9         | -0.02 |
| Cerebrovascular disease                | 2.7         | 1.7         | 0.07  | 2.3         | 2.4         | -0.01 |
| Heart disease                          | 11.8        | 8           | 0.13  | 10.3        | 11.7        | -0.04 |
| Malignant neoplastic disease           | 5           | 4.9         | 0     | 4.8         | 5.2         | -0.02 |
| Charlson comorbidity index, mean (SD)  | 1.84 (3.34) | 1.55 (2.96) | -0.07 | 1.56 (3.04) | 1.43 (2.79) | -0.03 |

1  
2  
3  
4  
5  
6  
7  
8  
9  
10  
11  
12  
13  
14  
15  
16  
17  
18  
19  
20  
21  
22  
23  
24  
25  
26  
27  
28  
29  
30  
31  
32  
33  
34  
35  
36  
37  
38  
39  
40  
41  
42  
43  
44  
45  
46  
47

|                                           |      |     |      |      |      |       |
|-------------------------------------------|------|-----|------|------|------|-------|
| Influenza vaccination within a year prior | 12.5 | 8.0 | 0.15 | 10.1 | 11.4 | -0.04 |
|-------------------------------------------|------|-----|------|------|------|-------|

- \* Hypertensive disorder includes primary and secondary hypertension
- \*\* Renal impairment includes acute and chronic renal failure (prerenal and renal);
- \*\*\* Heart disease includes cardiac arrhythmias, heart valve disorders, coronary arteriosclerosis, heart failure, cardiomyopathies, etc.

For peer review only



Distribution of vaccination month for COVID-19 vaccines. Black dots represent the number of incident COVID-19 cases (defined as a positive test) in each month.

338x190mm (144 x 144 DPI)



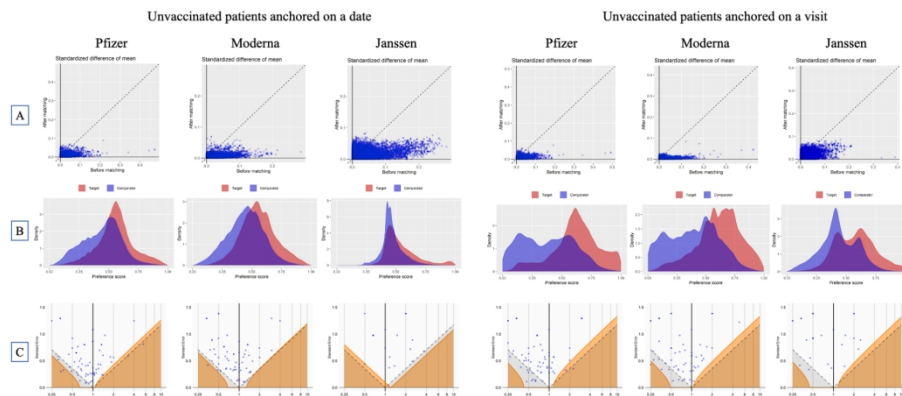

23 Diagnostics for the absolute effectiveness study comparing the cohort vaccinated with at least one dose of  
 24 Pfizer, Moderna or Janssen COVID-19 vaccines and unvaccinated cohort anchored on a date or on a visit:  
 25 (A) covariate balance before and after propensity score matching, (B) preference score balance and (C)  
 26 effect of negative control calibration displaying effect estimate and standard error.

27 In (A), each dot represents the standardized difference of the means for a single covariate before and after  
 28 stratification on the propensity score.

29 In (C), each blue dot is a negative control. The area below the dashed line indicates estimates with  $p < 0.05$   
 30 and the orange area indicates estimates with calibrated  $p < 0.05$ .

31 625x313mm (78 x 78 DPI)

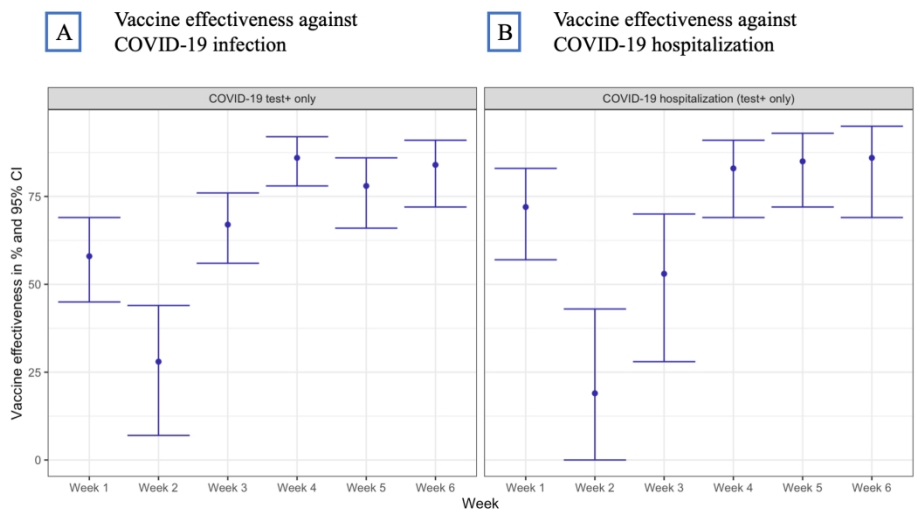

Effectiveness of Pfizer-BioNTech and Moderna vaccines over six 7-day intervals after 1st dose, % and 95% CI for COVID-19 infection (A) and COVID-19 hospitalization (B).

272x152mm (226 x 226 DPI)

1  
2  
3  
4  
5  
6  
7  
8  
9  
10  
11  
12  
13  
14  
15  
16  
17  
18  
19  
20  
21  
22  
23  
24  
25  
26  
27  
28  
29  
30  
31  
32  
33  
34  
35  
36  
37  
38  
39  
40  
41  
42  
43  
44  
45  
46  
47  
48  
49  
50  
51  
52  
53  
54  
55  
56  
57  
58  
59  
60

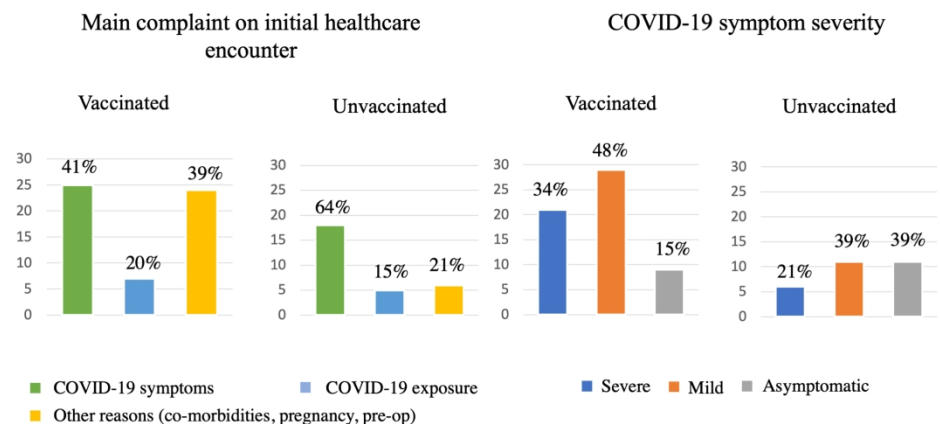

Chart review of COVID-19 cases (defined as a positive COVID-19 test) during week one, vaccinated and unvaccinated patients.

272x152mm (226 x 226 DPI)

## Supplementary materials

### Appendix 1. Data source description

The Columbia University Irving Medical Center (CUIMC) database comprises electronic health records on more than 6 million patients, with data collection starting in 1985. CUIMC is a Northeast US quaternary care center with primary care practices in northern Manhattan and surrounding areas, and the database includes inpatient and outpatient care. The database currently holds information about the person (demographics), visits (inpatient and outpatient), conditions (billing diagnoses and problem lists), drugs (outpatient prescriptions and inpatient orders and administrations), devices, measurements (laboratory tests and vital signs), and other observations (symptoms). The data sources include current and previous electronic health record systems (homegrown Clinical Information System, homegrown WebCIS, Allscripts Sunrise Clinical Manager, Allscripts TouchWorks, Epic Systems), administrative systems (IBM PCS-ADS, Eagle Registration, IDX Systems, Epic Systems), and ancillary systems (homegrown LIS, Sunquest, Cerner Laboratory). Additionally, it contains the information on vaccination from New York City and State immunization registries.

### Appendix 2. Retrospective cohort COVID-19 vaccine effectiveness study design overview.

#### Main analysis

**Target:** patients with at least one dose (Ad26.COV2.S BNT162b2 and mRNA-1273) located in NYC  
**Comparator:** unvaccinated patients matched on the date of vaccination located in NYC

#### Sensitivity analyses

- Alternative comparator: Patients matched on the visit
- Alternative target: fully vaccinated patients
- Alternative target and comparator: patients with or without prior COVID-19
- Alternative TAR: 1 day– 365 days

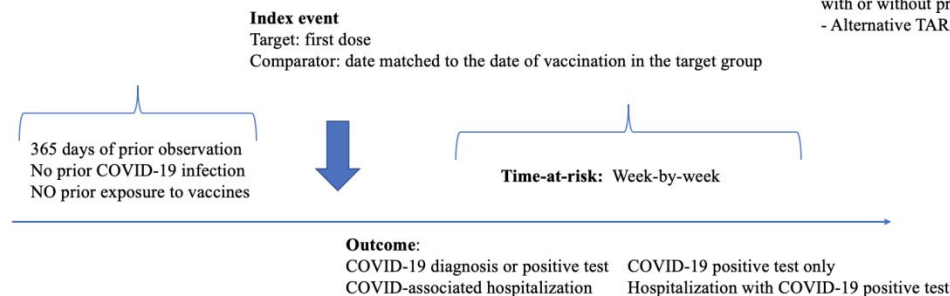

Cox proportional hazard model with 1:1 large scale propensity score matching (covariates include demographics, index year, month, # of visits; condition and drug groups; procedure, device, observation, measurement; long and short-term excluding day 0)

### Appendix 3. Cohort definitions and codes for the absolute COVID-19 vaccine effectiveness study

#### 3.1 Cohort definitions for target comparator and outcome cohorts for studying absolute effectiveness of COVID-19 vaccines.

|                    | <b>Definition and link to the public repository</b>                                                                                                                                                                                                                                                                                                                                                                                                                                                                                                                                                                                                                                                                                                                                                                                                                                                                                                                                                                                                                                                                                                                                                                                                                                                                                                                                                                                                                                                                                                                                                                                                            |
|--------------------|----------------------------------------------------------------------------------------------------------------------------------------------------------------------------------------------------------------------------------------------------------------------------------------------------------------------------------------------------------------------------------------------------------------------------------------------------------------------------------------------------------------------------------------------------------------------------------------------------------------------------------------------------------------------------------------------------------------------------------------------------------------------------------------------------------------------------------------------------------------------------------------------------------------------------------------------------------------------------------------------------------------------------------------------------------------------------------------------------------------------------------------------------------------------------------------------------------------------------------------------------------------------------------------------------------------------------------------------------------------------------------------------------------------------------------------------------------------------------------------------------------------------------------------------------------------------------------------------------------------------------------------------------------------|
| Target cohorts     | <p>Target cohorts were defined as patients with at least one dose of the corresponding vaccine (Pfizer BioNTech, Moderna, Janssen)<br/>           Index event: first exposure to the corresponding vaccine<br/>           Inclusion and exclusion criteria:</p> <ul style="list-style-type: none"> <li>- 365 days of prior observation</li> <li>- no other COVID-19 vaccine exposure in 120 days prior and 120 days after the index date</li> <li>- no prior COVID-19 infection (diagnosis code of COVID-19 or positive test)</li> <li>- residence in New York City determined by the zip code recorded</li> </ul> <p>For the analysis on fully vaccinated patients, we applied the same criteria and required patients to have a) the second dose of Pfizer or Moderna vaccine (if applicable) within 14 to 56 days after the first dose b) at least 14 days of observation after the second dose (one dose of Janssen).</p> <p><b>Links:</b><br/> <a href="https://atlas.ohdsi.org/#/cohortdefinition/498">https://atlas.ohdsi.org/#/cohortdefinition/498</a><br/> <a href="https://atlas.ohdsi.org/#/cohortdefinition/494">https://atlas.ohdsi.org/#/cohortdefinition/494</a><br/> <a href="https://atlas.ohdsi.org/#/cohortdefinition/497">https://atlas.ohdsi.org/#/cohortdefinition/497</a><br/> <br/> <a href="https://atlas.ohdsi.org/#/cohortdefinition/418">https://atlas.ohdsi.org/#/cohortdefinition/418</a><br/> <a href="https://atlas.ohdsi.org/#/cohortdefinition/417">https://atlas.ohdsi.org/#/cohortdefinition/417</a><br/> <a href="https://atlas.ohdsi.org/#/cohortdefinition/420">https://atlas.ohdsi.org/#/cohortdefinition/420</a></p> |
| Comparator cohorts | <p>Comparator cohorts were created separately for each target cohort by selecting patients with no COVID-19 vaccination in their record (any vaccine), 365 days of prior observation and New York City residence. The patients were matched on the index date of one of the target group participants for the comparator anchored on a date and on the date of a healthcare encounter within 3-day corridor for the comparator anchored on a visit.</p>                                                                                                                                                                                                                                                                                                                                                                                                                                                                                                                                                                                                                                                                                                                                                                                                                                                                                                                                                                                                                                                                                                                                                                                                        |

|                 |                                                                                                                                                                                                                                                                                                                                                                                                                                                                                                                                                                                                                                                                                                                                                         |
|-----------------|---------------------------------------------------------------------------------------------------------------------------------------------------------------------------------------------------------------------------------------------------------------------------------------------------------------------------------------------------------------------------------------------------------------------------------------------------------------------------------------------------------------------------------------------------------------------------------------------------------------------------------------------------------------------------------------------------------------------------------------------------------|
| Outcome cohorts | <p>For the main analysis COVID-19 infection was defined as a COVID-19 test with the result ‘Positive’ or ‘Detected’.</p> <p>COVID-19 associated hospitalization was defined as an inpatient, emergency department or intensive care unit admission with a positive COVID-19 test recorded within 30 days prior or during hospitalization.</p> <p>For a sensitivity analysis we applied the abovementioned criteria with adding COVID-19 diagnosis as an alternative for positive COVID-19 test.</p> <p>Links:</p> <p><a href="https://atlas.ohdsi.org/#/cohortdefinition/425">https://atlas.ohdsi.org/#/cohortdefinition/425</a></p> <p><a href="https://atlas.ohdsi.org/#/cohortdefinition/422">https://atlas.ohdsi.org/#/cohortdefinition/422</a></p> |
|-----------------|---------------------------------------------------------------------------------------------------------------------------------------------------------------------------------------------------------------------------------------------------------------------------------------------------------------------------------------------------------------------------------------------------------------------------------------------------------------------------------------------------------------------------------------------------------------------------------------------------------------------------------------------------------------------------------------------------------------------------------------------------------|

### 3.2 Codes used in the study.

#### 1. Pfizer vaccine:

RxNorm 2468235 SARS-CoV-2 (COVID-19) vaccine, mRNA-BNT162b2 0.1 MG/ML  
Injectable Suspension

#### 2. Moderna vaccine:

RxNorm 2470234 SARS-CoV-2 (COVID-19) vaccine, mRNA-1273 0.2 MG/ML  
Injectable Suspension

#### 3. Janssen vaccine:

CVX 212 SARS-COV-2 (COVID-19) vaccine, vector non-replicating, recombinant spike  
protein-Ad26, preservative free, 0.5 mL

#### 4. COVID-19 diagnosis:

ICD10-CM U07.1 Emergency use of U07.1 | COVID-19

#### 5. COVID-19 test:

LOINC 94500-6 SARS-CoV-2 (COVID-19) RNA [Presence] in Respiratory specimen by NAA  
with probe detection

LOINC 94558-4 SARS-CoV-2 (COVID-19) Ag [Presence] in Respiratory specimen by Rapid  
immunoassay

#### Appendix 4. Negative controls

| SNOMED concept id | SNOMED concept name                                       |
|-------------------|-----------------------------------------------------------|
| 438945            | Accidental poisoning by benzodiazepine-based tranquilizer |
| 434455            | Acquired claw toes                                        |
| 316211            | Acquired spondylolisthesis                                |
| 201612            | Alcoholic liver damage                                    |
| 438730            | Alkalosis                                                 |
| 441258            | Anemia in neoplastic disease                              |
| 432513            | Animal bite wound                                         |
| 4171556           | Ankle ulcer                                               |
| 4098292           | Antiphospholipid syndrome                                 |
| 77650             | Aseptic necrosis of bone                                  |
| 4239873           | Benign neoplasm of ciliary body                           |
| 23731             | Benign neoplasm of larynx                                 |
| 199764            | Benign neoplasm of ovary                                  |
| 195500            | Benign neoplasm of uterus                                 |
| 4145627           | Biliary calculus                                          |
| 4108471           | Burn of digit of hand                                     |
| 75121             | Burn of lower leg                                         |
| 4284982           | Calculus of bile duct without obstruction                 |
| 434327            | Cannabis abuse                                            |
| 78497             | Cellulitis and abscess of toe                             |
| 4001454           | Cervical spine ankylosis                                  |
| 4068241           | Chronic instability of knee                               |
| 195596            | Chronic pancreatitis                                      |
| 4206338           | Chronic salpingitis                                       |
| 4058397           | Claustrophobia                                            |
| 74816             | Contusion of toe                                          |
| 73302             | Curvature of spine                                        |
| 4151134           | Cyst of pancreas                                          |
| 77638             | Displacement of intervertebral disc without myelopathy    |
| 195864            | Diverticulum of bladder                                   |
| 201346            | Edema of penis                                            |
| 200461            | Endometriosis of uterus                                   |
| 377877            | Esotropia                                                 |
| 193530            | Follicular cyst of ovary                                  |
| 4094822           | Foreign body in respiratory tract                         |
| 443421            | Gallbladder and bile duct calculi                         |

|          |                                                 |
|----------|-------------------------------------------------|
| 4299408  | Gouty tophus                                    |
| 135215   | Hashimoto thyroiditis                           |
| 442190   | Hemorrhage of colon                             |
| 43020475 | High risk heterosexual behavior                 |
| 194149   | Hirschsprung's disease                          |
| 443204   | Human ehrlichiosis                              |
| 4226238  | Hyperosmolar coma due to diabetes mellitus      |
| 4032787  | Hyperosmolarity                                 |
| 197032   | Hyperplasia of prostate                         |
| 140362   | Hypoparathyroidism                              |
| 435371   | Hypothermia                                     |
| 138690   | Infestation by Pediculus                        |
| 4152376  | Intentional self poisoning                      |
| 192953   | Intestinal adhesions with obstruction           |
| 196347   | Intestinal parasitism                           |
| 137977   | Jaundice                                        |
| 317510   | Leukemia                                        |
| 765053   | Lump in right breast                            |
| 378165   | Nystagmus                                       |
| 434085   | Obstruction of duodenum                         |
| 4147016  | Open wound of buttock                           |
| 4129404  | Open wound of upper arm                         |
| 438120   | Opioid dependence                               |
| 75924    | Osteodystrophy                                  |
| 432594   | Osteomalacia                                    |
| 30365    | Panhypopituitarism                              |
| 4108371  | Peripheral gangrene                             |
| 440367   | Plasmacytosis                                   |
| 439233   | Poisoning by antidiabetic agent                 |
| 442149   | Poisoning by bee sting                          |
| 4314086  | Poisoning due to sting of ant                   |
| 4147660  | Postural kyphosis                               |
| 434319   | Premature ejaculation                           |
| 199754   | Primary malignant neoplasm of pancreas          |
| 4311499  | Primary malignant neoplasm of respiratory tract |
| 436635   | Primary malignant neoplasm of sigmoid colon     |
| 196044   | Primary malignant neoplasm of stomach           |
| 433716   | Primary malignant neoplasm of testis            |
| 133424   | Primary malignant neoplasm of thyroid gland     |



|          |                                                     |
|----------|-----------------------------------------------------|
| 194997   | Prostatitis                                         |
| 80286    | Prosthetic joint loosening                          |
| 443274   | Psychostimulant dependence                          |
| 314962   | Raynaud's disease                                   |
| 37018294 | Residual osteitis                                   |
| 4288241  | Salmonella enterica subspecies arizonae infection   |
| 45757269 | Sclerosing mesenteritis                             |
| 74722    | Secondary localized osteoarthritis of pelvic region |
| 200348   | Secondary malignant neoplasm of large intestine     |
| 43020446 | Sedative withdrawal                                 |
| 74194    | Sprain of spinal ligament                           |
| 4194207  | Tailor's bunion                                     |
| 193521   | Tropical sprue                                      |
| 40482801 | Type II diabetes mellitus uncontrolled              |
| 74719    | Ulcer of foot                                       |
| 196625   | Viral hepatitis A without hepatic coma              |
| 197494   | Viral hepatitis C                                   |
| 4284533  | Vitamin D-dependent rickets                         |

Link to the original list of negative controls used in EUMAEUS study: [https://ohdsi-studies.github.io/Eumaeus/Protocol.html#8\\_Research\\_Methods](https://ohdsi-studies.github.io/Eumaeus/Protocol.html#8_Research_Methods)

**Appendix 5.** Summary of manual chart review of COVID-19 infection cases during week 1 after the index date, patients vaccinated with mRNA vaccines and unvaccinated patients.

|                                                                  | <b>Pfizer-BioNTech</b> | <b>Moderna</b> | <b>Pfizer-BioNTech and Moderna</b> | <b>Unvaccinated patients</b> |
|------------------------------------------------------------------|------------------------|----------------|------------------------------------|------------------------------|
| Total                                                            | 36                     | 25             | 61                                 | 28                           |
| Average age                                                      | 65                     | 67.8           | 65.8                               | 58                           |
| <b><i>COVID-19 symptoms</i></b>                                  |                        |                |                                    |                              |
| Severe                                                           | 14 (39%)               | 7 (28%)        | 21 (34%)                           | 6 (21%)                      |
| Mild                                                             | 18 (50%)               | 11 (44%)       | 29 (48%)                           | 11 (39%)                     |
| Asymptomatic                                                     | 2 (6%)                 | 7 (28%)        | 9 (15%)                            | 11 (39%)                     |
| <b><i>Reason for coming for initial healthcare encounter</i></b> |                        |                |                                    |                              |
| COVID-19 symptoms                                                | 17 (47%)               | 8 (32%)        | 25 (41%)                           | 18 (64%)                     |
| Exposure to COVID-19                                             | 3 (8%)                 | 4 (16%)        | 7 (11%)                            | 5 (18%)                      |
| For other reason (co-morbidities, procedures etc.)               | 13 (36%)               | 11 (44%)       | 24 (39%)                           | 6 (21%)                      |

| <i>Type of initial healthcare encounter</i> |          |          |          |          |
|---------------------------------------------|----------|----------|----------|----------|
| Telehealth/phone                            | 5 (14%)  | 6 (24%)  | 11 (18%) | 3 (11%)  |
| Test only                                   | 3 (8%)   | 2 (8%)   | 5 (8%)   | 6 (21%)  |
| OP                                          | 4 (11%)  | 3 (12%)  | 7 (11%)  | 1 (4%)   |
| ED or IP                                    | 24 (67%) | 14 (56%) | 38 (62%) | 18 (64%) |

**Appendix 6.** Kaplan-Meier curves for effectiveness of COVID-19 Pfizer-BioNTech vaccine for time-at-risk of 1 day – 365 days after the first dose compared to the unvaccinated patients residing in New York City.

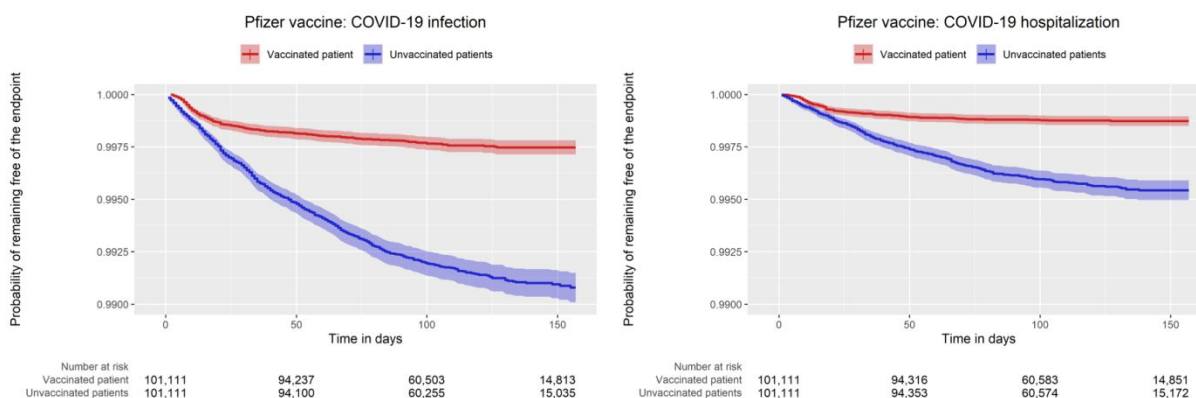

**Appendix 7.** Kaplan-Meier curves for effectiveness of COVID-19 Moderna vaccine for time-at-risk of 1 day – 365 days after the first dose compared to the unvaccinated patients residing in New York City.

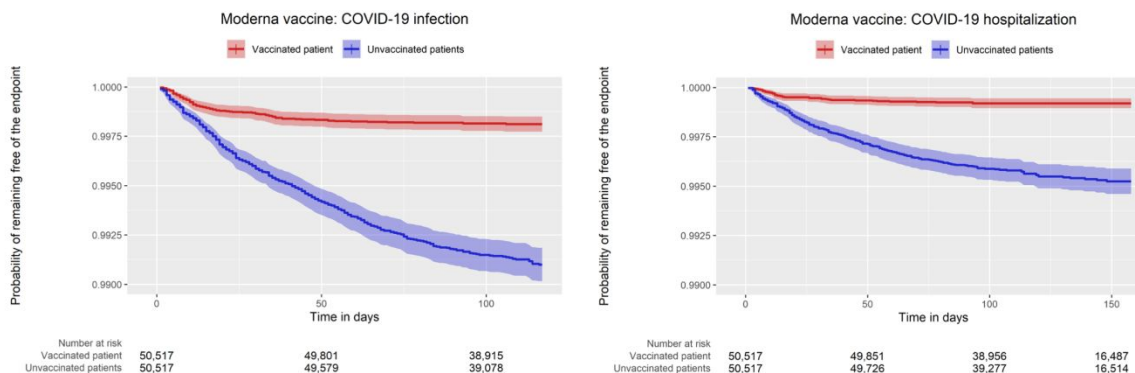

**Appendix 8.** Kaplan-Meier curves for effectiveness of COVID-19 Janssen vaccine for time-at-risk of 1 day – 365 days after the first dose compared to the unvaccinated patients residing in New York City.

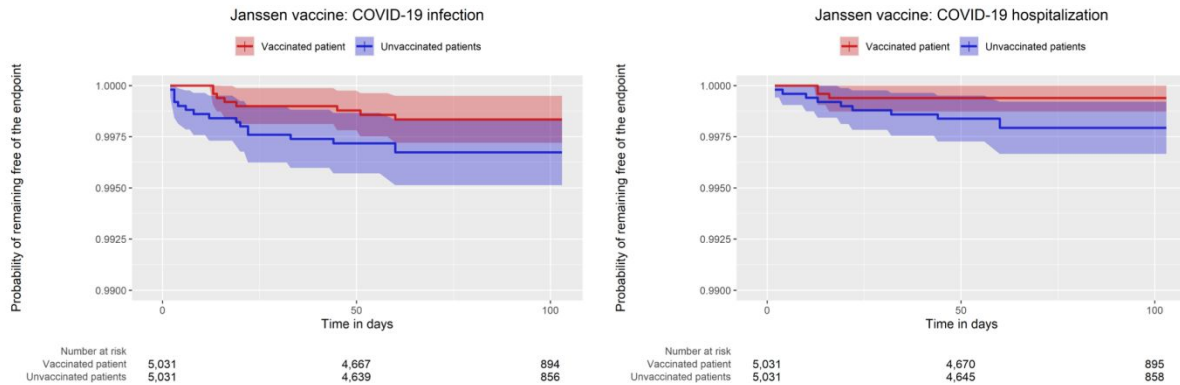

**Appendix 9.** Estimates for absolute effectiveness of COVID-19 vaccines for time-at-risk of 1 day – 365 days after the first dose in the vaccinated patients without prior COVID-19 infection compared to unvaccinated patients residing in NYC.

|                        | COVID-19 infection |         | COVID-19 hospitalization |         | COVID-19 positive test only |         | COVID-19 positive test only hospitalization |         |
|------------------------|--------------------|---------|--------------------------|---------|-----------------------------|---------|---------------------------------------------|---------|
|                        | VE (95% CI), %     | P-value | VE (95% CI), %           | P-value | VE (95% CI), %              | P-value | VE (95% CI), %                              | P-value |
| <b>Pfizer-BioNTech</b> | 42 (37 – 47)       | <0.01   | 63 (56–70)               | <0.01   | 71 (66 – 75)                | <0.01   | 69 (62 – 75)                                | <0.01   |
| <b>Moderna</b>         | 54 (48 – 60)       | <0.01   | 76 (69 – 82)             | <0.01   | 78 (73 – 83)                | <0.01   | 81 (74 – 87)                                | <0.01   |
| <b>Janssen</b>         | 24 (0–55)          | 0.31    | 64 (0.1 – 1.06)          | 0.09    | 53 (0 – 82)                 | 0.1     | 70 (2 – 93)                                 | 0.08    |

**Appendix 10.** Estimates for absolute effectiveness of COVID-19 vaccines for time-at-risk of 1 day – 365 days after full vaccination in fully vaccinated patients without prior COVID-19 infection compared to unvaccinated patients residing in NYC.

|  | COVID-19 positive test only |         | COVID-19 positive test only hospitalization |         | COVID-19 infection |         | COVID-19 hospitalization |         |
|--|-----------------------------|---------|---------------------------------------------|---------|--------------------|---------|--------------------------|---------|
|  | VE (95% CI), %              | P-value | VE (95% CI), %                              | P-value | VE (95% CI), %     | P-value | VE (95% CI), %           | P-value |

|                        |            |       |             |       |              |       |            |       |
|------------------------|------------|-------|-------------|-------|--------------|-------|------------|-------|
| <b>Pfizer-BioNTech</b> | 94 (91-95) | <0.01 | 95 (92-97)  | <0.01 | 70 (66-74)   | <0.01 | 88 (84-92) | <0.01 |
| <b>Moderna</b>         | 97 (94-98) | <0.01 | 96 (92-99)  | <0.01 | 72 (66 – 77) | <0.01 | 92 (87-95) | <0.01 |
| <b>Janssen</b>         | 81 (50-94) | <0.01 | 92 (58-100) | 0.03  | 55 (23 – 75) | 0.01  | 87 (56-98) | 0.01  |

**Appendix 11.** Comparison of the absolute effectiveness estimates in fully vaccinated patients obtained in our study and those from the randomized clinical trials of the corresponding vaccines.

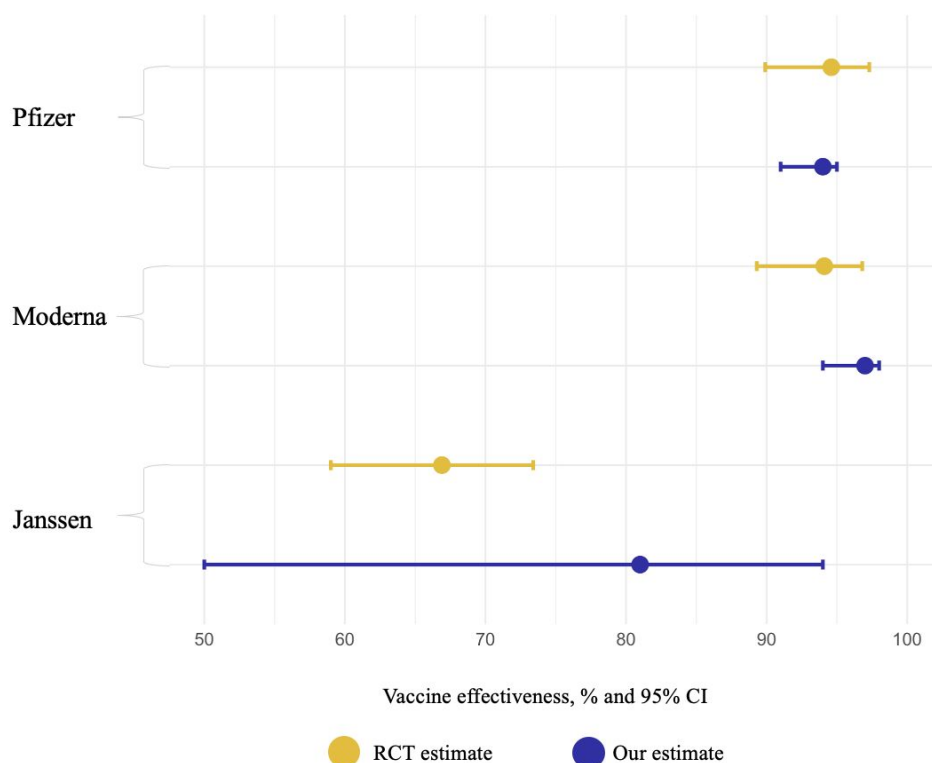

**Appendix 12.** Estimates for absolute effectiveness of COVID-19 vaccines for time-at-risk of 1 day – 365 days after the first dose in the vaccinated patients with or without prior COVID-19 infection compared to unvaccinated patients residing in NYC.

|  | <b>COVID-19 infection</b> |         | <b>COVID-19 hospitalization</b> |         | <b>COVID-19 positive test only</b> |         | <b>COVID-19 positive test only hospitalization</b> |         |
|--|---------------------------|---------|---------------------------------|---------|------------------------------------|---------|----------------------------------------------------|---------|
|  | VE (95% CI), %            | P-value | VE (95% CI), %                  | P-value | VE (95% CI), %                     | P-value | VE (95% CI), %                                     | P-value |
|  |                           |         |                                 |         |                                    |         |                                                    |         |

|                        |            |       |            |       |            |       |            |       |
|------------------------|------------|-------|------------|-------|------------|-------|------------|-------|
| <b>Pfizer-BioNTech</b> | 43 (38-48) | <0.01 | 64 (57-70) | <0.01 | 71 (66-75) | <0.01 | 71(64-76)  | <0.01 |
| <b>Moderna</b>         | 51 (45-57) | <0.01 | 71 (63-78) | <0.01 | 76 (71-81) | <0.01 | 81 (73-86) | <0.01 |
| <b>Janssen</b>         | 15 (0-49)  | 0.52  | 60 (2-86)  | 0.06  | 45 (0-75)  | 0.12  | 63 (0-90)  | 0.09  |

For peer review only

STROBE Statement—Checklist of items that should be included in reports of *cohort studies*

|                              | Item No | Recommendation                                                                                                                                                                                                                                                                                                         | Page No                      |
|------------------------------|---------|------------------------------------------------------------------------------------------------------------------------------------------------------------------------------------------------------------------------------------------------------------------------------------------------------------------------|------------------------------|
| <b>Title and abstract</b>    | 1       | (a) Indicate the study's design with a commonly used term in the title or the abstract                                                                                                                                                                                                                                 | 2                            |
|                              |         | (b) Provide in the abstract an informative and balanced summary of what was done and what was found                                                                                                                                                                                                                    | 2                            |
| <b>Introduction</b>          |         |                                                                                                                                                                                                                                                                                                                        |                              |
| Background/rationale         | 2       | Explain the scientific background and rationale for the investigation being reported                                                                                                                                                                                                                                   | 4                            |
| Objectives                   | 3       | State specific objectives, including any prespecified hypotheses                                                                                                                                                                                                                                                       | 5                            |
| <b>Methods</b>               |         |                                                                                                                                                                                                                                                                                                                        |                              |
| Study design                 | 4       | Present key elements of study design early in the paper                                                                                                                                                                                                                                                                | 5                            |
| Setting                      | 5       | Describe the setting, locations, and relevant dates, including periods of recruitment, exposure, follow-up, and data collection                                                                                                                                                                                        | 5,6                          |
| Participants                 | 6       | (a) Give the eligibility criteria, and the sources and methods of selection of participants. Describe methods of follow-up<br>(b) For matched studies, give matching criteria and number of exposed and unexposed                                                                                                      | 5                            |
| Variables                    | 7       | Clearly define all outcomes, exposures, predictors, potential confounders, and effect modifiers. Give diagnostic criteria, if applicable                                                                                                                                                                               | 5-7                          |
| Data sources/<br>measurement | 8*      | For each variable of interest, give sources of data and details of methods of assessment (measurement). Describe comparability of assessment methods if there is more than one group                                                                                                                                   | 5                            |
| Bias                         | 9       | Describe any efforts to address potential sources of bias                                                                                                                                                                                                                                                              | 6-7                          |
| Study size                   | 10      | Explain how the study size was arrived at                                                                                                                                                                                                                                                                              | 5                            |
| Quantitative variables       | 11      | Explain how quantitative variables were handled in the analyses. If applicable, describe which groupings were chosen and why                                                                                                                                                                                           | 6-7                          |
| Statistical methods          | 12      | (a) Describe all statistical methods, including those used to control for confounding<br>(b) Describe any methods used to examine subgroups and interactions<br>(c) Explain how missing data were addressed<br>(d) If applicable, explain how loss to follow-up was addressed<br>(e) Describe any sensitivity analyses | 6-7<br>6-7<br>-<br>NA<br>6-7 |
| <b>Results</b>               |         |                                                                                                                                                                                                                                                                                                                        |                              |
| Participants                 | 13*     | (a) Report numbers of individuals at each stage of study—eg numbers potentially eligible, examined for eligibility, confirmed eligible, included in the study, completing follow-up, and analysed<br>(b) Give reasons for non-participation at each stage<br>(c) Consider use of a flow diagram                        | 7                            |
| Descriptive data             | 14*     | (a) Give characteristics of study participants (eg demographic, clinical, social) and information on exposures and potential confounders<br>(b) Indicate number of participants with missing data for each variable of interest<br>(c) Summarise follow-up time (eg, average and total amount)                         | 8,<br>18-<br>20<br><br>8, 18 |
| Outcome data                 | 15*     | Report numbers of outcome events or summary measures over time                                                                                                                                                                                                                                                         | 8                            |

|    |                          |    |                                                                                                                                                                                                              |                            |
|----|--------------------------|----|--------------------------------------------------------------------------------------------------------------------------------------------------------------------------------------------------------------|----------------------------|
| 1  | Main results             | 16 | (a) Give unadjusted estimates and, if applicable, confounder-adjusted estimates and their precision (eg, 95% confidence interval). Make clear which confounders were adjusted for and why they were included | 8, supplementary materials |
| 2  |                          |    | (b) Report category boundaries when continuous variables were categorized                                                                                                                                    |                            |
| 3  |                          |    | (c) If relevant, consider translating estimates of relative risk into absolute risk for a meaningful time period                                                                                             |                            |
| 4  | Other analyses           | 17 | Report other analyses done—eg analyses of subgroups and interactions, and sensitivity analyses                                                                                                               | 9                          |
| 5  | <b>Discussion</b>        |    |                                                                                                                                                                                                              |                            |
| 6  | Key results              | 18 | Summarise key results with reference to study objectives                                                                                                                                                     | 10                         |
| 7  | Limitations              | 19 | Discuss limitations of the study, taking into account sources of potential bias or imprecision. Discuss both direction and magnitude of any potential bias                                                   | 12                         |
| 8  | Interpretation           | 20 | Give a cautious overall interpretation of results considering objectives, limitations, multiplicity of analyses, results from similar studies, and other relevant evidence                                   | 10-12                      |
| 9  | Generalisability         | 21 | Discuss the generalisability (external validity) of the study results                                                                                                                                        | 11-12                      |
| 10 | <b>Other information</b> |    |                                                                                                                                                                                                              |                            |
| 11 | Funding                  | 22 | Give the source of funding and the role of the funders for the present study and, if applicable, for the original study on which the present article is based                                                | 13                         |

\*Give information separately for exposed and unexposed groups.

**Note:** An Explanation and Elaboration article discusses each checklist item and gives methodological background and published examples of transparent reporting. The STROBE checklist is best used in conjunction with this article (freely available on the Web sites of PLoS Medicine at <http://www.plosmedicine.org/>, Annals of Internal Medicine at <http://www.annals.org/>, and Epidemiology at <http://www.epidem.com/>). Information on the STROBE Initiative is available at <http://www.strobe-statement.org>.

# BMJ Open

## COVID-19 vaccination effectiveness rates by week and sources of bias: a retrospective cohort study

|                                 |                                                                                                                                                                                                                           |
|---------------------------------|---------------------------------------------------------------------------------------------------------------------------------------------------------------------------------------------------------------------------|
| Journal:                        | <i>BMJ Open</i>                                                                                                                                                                                                           |
| Manuscript ID                   | bmjopen-2022-061126.R2                                                                                                                                                                                                    |
| Article Type:                   | Original research                                                                                                                                                                                                         |
| Date Submitted by the Author:   | 27-Jun-2022                                                                                                                                                                                                               |
| Complete List of Authors:       | Ostropolets, Anna; Columbia University Medical Center, Department of Biomedical Informatics<br>Hripcsak, George; Columbia University Medical Center, Department of Biomedical Informatics; New York-Presbyterian Hospital |
| <b>Primary Subject Heading</b>: | Health informatics                                                                                                                                                                                                        |
| Secondary Subject Heading:      | Epidemiology, Infectious diseases, Public health                                                                                                                                                                          |
| Keywords:                       | COVID-19, Health informatics < BIOTECHNOLOGY & BIOINFORMATICS, EPIDEMIOLOGY                                                                                                                                               |
|                                 |                                                                                                                                                                                                                           |

SCHOLARONE™  
Manuscripts





I, the Submitting Author has the right to grant and does grant on behalf of all authors of the Work (as defined in the below author licence), an exclusive licence and/or a non-exclusive licence for contributions from authors who are: i) UK Crown employees; ii) where BMJ has agreed a CC-BY licence shall apply, and/or iii) in accordance with the terms applicable for US Federal Government officers or employees acting as part of their official duties; on a worldwide, perpetual, irrevocable, royalty-free basis to BMJ Publishing Group Ltd ("BMJ") its licensees and where the relevant Journal is co-owned by BMJ to the co-owners of the Journal, to publish the Work in this journal and any other BMJ products and to exploit all rights, as set out in our [licence](#).

The Submitting Author accepts and understands that any supply made under these terms is made by BMJ to the Submitting Author unless you are acting as an employee on behalf of your employer or a postgraduate student of an affiliated institution which is paying any applicable article publishing charge ("APC") for Open Access articles. Where the Submitting Author wishes to make the Work available on an Open Access basis (and intends to pay the relevant APC), the terms of reuse of such Open Access shall be governed by a Creative Commons licence – details of these licences and which [Creative Commons](#) licence will apply to this Work are set out in our licence referred to above.

Other than as permitted in any relevant BMJ Author's Self Archiving Policies, I confirm this Work has not been accepted for publication elsewhere, is not being considered for publication elsewhere and does not duplicate material already published. I confirm all authors consent to publication of this Work and authorise the granting of this licence.

1  
2  
3 1  
4  
5 2  
6 3 **COVID-19 vaccination effectiveness rates by week and sources of bias: a retrospective cohort study**  
7  
8 4

9 5 Anna Ostroplets, MD<sup>1</sup>, George Hripcsak, MD<sup>1,2</sup>  
10 6

11 7  
12 8 <sup>1</sup>Department of Biomedical Informatics, Columbia University Medical Center, New York, NY, USA

13 9  
14 10 <sup>2</sup>Medical Informatics Services, New York-Presbyterian Hospital, New York, NY, USA;  
15 11

16 12  
17 13 Corresponding author: George Hripcsak, [gh13@cumc.columbia.edu](mailto:gh13@cumc.columbia.edu), Columbia University Irving Medical  
18 14 Center, 622 West 168th Street, PH-20, New York, NY, USA  
19 15  
20 16  
21 17  
22 18  
23 19  
24 20  
25 21  
26 22  
27 23  
28 24  
29 25  
30 26  
31 27  
32 28  
33 29  
34 30  
35 31  
36 32  
37 33  
38  
39  
40  
41  
42  
43  
44  
45  
46  
47  
48  
49  
50  
51  
52  
53  
54  
55  
56  
57  
58  
59  
60

## 34 **ABSTRACT**

### 36 **Objective**

37 To examine COVID-19 vaccine effectiveness over six 7-day intervals after the first dose and assess  
38 underlying bias in observational data.

### 40 **Design and setting**

41 Retrospective cohort study using Columbia University Medical Center data linked to State and City  
42 Immunization Registries.

### 44 **Outcomes and measures**

45 We used large-scale propensity score matching with up to 54,987 covariates, fitted Cox proportional  
46 hazards models and constructed Kaplan-Meier plots for two main outcomes (COVID-19 infection and  
47 COVID-19-associated hospitalization). We conducted manual chart review of cases in week one in both  
48 groups along with a set of secondary analyses for other index date, outcome and population choices.

### 50 **Results**

51 The study included 179,666 patients. We observed increasing effectiveness after the first dose of mRNA  
52 vaccines with week six effectiveness approximating 84% (95% CI 72-91%) for COVID-19 infection and  
53 86% (95% CI 69-95) for COVID-19-associated hospitalization. When analyzing unexpectedly high  
54 effectiveness in week one, chart review revealed that vaccinated patients are less likely to seek care after  
55 vaccination and are more likely to be diagnosed with COVID-19 during the encounters for other  
56 conditions. Secondary analyses highlighted potential outcome misclassification for ICD10-CM diagnosis,  
57 the influence of excluding patients with prior COVID-19 infection and anchoring in the unexposed group.  
58 Overall vaccine effectiveness in fully vaccinated patients matched the results of the randomized trials.

### 60 **Conclusions**

61 For vaccine effectiveness studies, observational data need to be scrutinized to ensure compared groups  
62 exhibit similar health seeking behavior and are equally likely to be captured in the data. While we found  
63 that studies may be capable of accurately estimating long-term effectiveness despite bias in early weeks,  
64 the early week results should be reported in every study so that we may gain a better understanding of the  
65 biases. Given the difference in temporal trends of vaccine exposure and baseline characteristics, indirect  
66 comparison of vaccines may produce biased results.

1  
2  
3 **68 Strengths and limitations of this study**  
4

5  
6 **69** - This study thoroughly investigates weekly COVID-19 vaccine effectiveness using methods to reduce  
7  
8 **70** potential confounding (large-scale propensity score matching, negative control calibration) and  
9  
10 **71** accompanied by manual chart review of the cases in week one

11  
12 **72** - The study includes a range of secondary analyses for different patient populations, anchoring strategies  
13  
14 **73** and outcome definitions.

15  
16 **74** - The study was carried out using routinely collected clinical practice data, which represents real-world  
17  
18 **75** patients, but also implies a risk of misclassification.

19  
20 **76** **Word count:** 3483

21  
22 **77** **Keywords:** COVID-19, Epidemiology, Health Informatics, Bias  
23  
24  
25  
26  
27  
28  
29  
30  
31  
32  
33  
34  
35  
36  
37  
38  
39  
40  
41  
42  
43  
44  
45  
46  
47  
48  
49  
50  
51  
52  
53  
54  
55  
56  
57  
58  
59  
60

## 99 BACKGROUND

100  
101 Randomized clinical phase-3 trials have demonstrated high efficacy for the four most commonly used  
102 COVID-19 vaccines against symptomatic COVID-19 infection, ranging from 66.9% and 70.4% for  
103 Ad26.COV2.S (Johnson & Johnson–Janssen) and ChAdOx1 (Astrazeneca) to 94.1% and 94.6% for  
104 BNT162b2 (Pfizer–BioNTech) and mRNA-1273 (Moderna) vaccines (1–4). Their rapid approval and  
105 widespread use require robust post-marketing studies that leverage large sample size, heterogeneous  
106 populations, and longer follow-up available in observational data.

107  
108 There have been recent observational studies, which have shown effectiveness similar to the randomized  
109 clinical trials (RCTs) across the globe, both test-negative and cohort (5–12), followed by studies across  
110 different patient populations, variants and number of doses (13–17).

111  
112 Nevertheless, the challenges associated with the use of observational data such as incomplete data  
113 capture, outcome misclassification and appropriate comparator sampling can undermine the results of the  
114 studies if such biases are not accounted for (18). For COVID-19 vaccines, questions associated with  
115 vaccine status misclassification (19), matching vaccinated and unvaccinated populations (6), addressing  
116 disease risk factor confounding and ascertainment bias (20,21) and others were raised.

117  
118 One of such questions is COVID-19 vaccine effectiveness during the first two weeks following the first  
119 dose. Studies have shown contradicting results for Pfizer–BioNTech vaccine with effectiveness ranging  
120 from moderate effectiveness of 52% (3) to very high effectiveness of 92.6% (22). Similarly, a recent  
121 study showed an unexplained high effectiveness of Janssen vaccine during week one (23). Other studies  
122 simply excluded the first week(s) from the time-at-risk (9,13,24–26). While week one lack of  
123 effectiveness has been suggested as a metric for lack of confounding in the long-term vaccine  
124 effectiveness studies, the reasons for high effectiveness and its impact on the validity of the conclusions  
125 regarding the overall effectiveness remain unclear (9).

126  
127 The goal of this study was to examine COVID-19 vaccine effectiveness over six 7-day intervals after the  
128 first dose to assess underlying bias associated with the use of observational data for short-term vaccine  
129 effectiveness and its impact on long-term vaccine effectiveness estimates . We employed large-scale  
130 propensity score matching and many negative controls to reduce and assess bias and leveraged a range of  
131 secondary analyses as well as manual review of the COVID-19 infection cases in week one to examine  
132 health-seeking behavior of vaccinated and unvaccinated patients.

1  
2  
3 1334 134 **METHODS**5 135  
6 1367 137  
8 138 *Main design*9 139  
10 140

11 138 For this retrospective observational cohort study, we used electronic health records from the Columbia  
12 139 University Irving Medical Center (CUIMC) database (Appendix 1), which has an ongoing automated  
13 140 connection to New York City and State public health department vaccine registries and includes all  
14 141 within-state vaccinations for our population. The data were translated to the OMOP Common Data Model  
15 142 version 5 as was used in multiple studies (27).  
16 143

17 144

18 144 For our main analysis, we studied two mRNA vaccines (Pfizer-BioNTech or Moderna). The exposed  
19 145 group included patients indexed on the first dose of one of the corresponding vaccines with no prior  
20 146 COVID-19 infection and no previous exposure to other COVID-19 vaccines. For the unexposed group,  
21 147 we selected unvaccinated patients and set their index date to a date (not necessarily with any medical  
22 148 event) that matched the index date of one of the exposed group participants. Both the exposed and  
23 149 unexposed groups had at least 365 days of prior observation and primarily resided in New York City  
24 150 according to their zip code. Patients who did not reside in New York were excluded from the study to  
25 151 ensure reliable vaccination data capture.  
26 152

27 153

28 153 Outcomes of interest included a) COVID-19 infection defined as a positive COVID-19 test (reverse-  
29 154 transcriptase–polymerase-chain-reaction assay) or a diagnostic code of COVID-19 and b) COVID-19  
30 155 hospitalization defined as an inpatient visit associated with a COVID-19 positive test or diagnosis within  
31 156 30 days prior or during the visit. Upon further examination of the results, we added two other outcomes:  
32 157 a) COVID-19 positive test only and b) COVID-19 hospitalization associated with a positive COVID-19  
33 158 test. Design overview is provided in Appendix 2; code lists and links to phenotype definitions are  
34 159 provided in Appendix 3.  
35 160

36 161

37 161 We calculated vaccine effectiveness during six consecutive 7-day intervals after the first dose. Within  
38 162 each interval, patients were followed-up until an outcome, end of the period or death, whichever came  
39 163 earlier. Additionally, given the results for vaccine effectiveness during week one following the first dose,  
40 164 we conducted chart review for patients with a COVID-19 positive test recorded in the abovementioned  
41 165 period. We reviewed all cases for the vaccinated population as well a random sample of the cases in the  
42 166 unvaccinated population and extracted main complaint, COVID-19 history, including symptoms (fever,  
43  
44  
45  
46  
47  
48  
49  
50  
51  
52  
53  
54  
55  
56  
57  
58  
59  
60

1  
2  
3 167 shortness of breath, sore throat, cough etc.), severity, time from the first symptom to encounter and  
4 168 COVID-19 exposure.

5  
6 169

7  
8 170 ***Secondary analyses***

9 171  
10  
11 172 We also conducted a set of secondary analyses. First, given that the published studies focused on patients  
12 173 without prior COVID-19 infection, we studied all eligible patients regardless of their previous COVID-19  
13 174 status.

14 175  
15  
16 176 As the strategy for unvaccinated group index date selection (anchoring) has been reported to influence  
17 177 incidence of outcomes and baseline characteristics (28,29), we additionally tested unexposed patients  
18 178 indexed on a healthcare encounter matching the index date of one of the exposed group participants  
19 179 within 3 days corridor, with at least 365 days of prior observation located at New York.

20 180  
21  
22 181 Finally, we assessed vaccine effectiveness in patients with at least one dose of a COVID-19 vaccine and  
23 182 in fully vaccinated patients over all available follow-up to compare the estimates to the results of the  
24 183 RCTs. The latter was defined as 14 days after the second dose of Pfizer-BioNTech or Moderna vaccines  
25 184 or first dose of Janssen vaccine. For each comparison we estimated hazard ratios (HRs) and constructed  
26 185 Kaplan-Meier plots as described below.

27  
28 186

29  
30  
31 187 ***Statistical methods***

32 188 For each analysis, we fitted a lasso regression model to calculate propensity score and match patients in  
33 189 each exposed and unexposed group with 1:1 ratio. For large-scale propensity score model we used all  
34 190 demographic information, index year and month, as well as the number of visits, condition and drug  
35 191 groups, procedures, device exposures, laboratory and instrumental tests and other observations over long  
36 192 (prior year) and short-term period (prior month) (30,31).

37  
38  
39 193 For each outcome, we fitted a Cox proportional hazards models to estimate HRs and constructed Kaplan-  
40 194 Meier plots. Empirical calibration based on the negative control outcomes was used to identify and  
41 195 minimize any potential residual confounding by calibrating HRs and 95% confidence intervals (CIs)  
42 196 (32,33). Vaccine effectiveness was calculated as  $100\% \times (1 - \text{hazard ratio})$ .

1  
2  
3 197 All analyses were supported by the OHDSI Infrastructure (CohortMethod package, available  
4 198 at <https://ohdsi.github.io/CohortMethod/>, FeatureExtraction available at  
5  
6 199 <https://ohdsi.github.io/FeatureExtraction/> and the Cyclops package for large-scale regularized regression  
7  
8 200 (34) available at <https://ohdsi.github.io/Cyclops/>.

### 201 ***Diagnostics***

202 We used multiple sources of diagnostics to estimate potential bias and confounding following best  
203 practices for evidence generation (35). First, we examined covariate and propensity score balance prior to  
204 proceeding with outcome modelling and effect estimation to ensure that we have enough sample size and  
205 to control for potential observed confounding (35). We plotted propensity scores to investigate the  
206 overlap in patient populations at the baseline and examined the balance of all baseline characteristics to  
207 determine if the exposed and unexposed cohorts were imbalanced at the baseline and after propensity  
208 score matching. Exposed and unexposed cohorts were said to be balanced if the standardized difference of  
209 means of all covariates after propensity score matching was less than 0.1 (36).

210 For negative control calibration, we used 93 negative controls (Appendix 4) with no known causal  
211 relationship with the COVID-19 vaccines. Negative controls were selected based on a review of existing  
212 literature, product labels and spontaneous reports and were reviewed by clinicians (37). We assessed  
213 residual bias from the negative control estimates.

### 214 **Patient and public involvement**

215  
216 No patient involved

217  
218

## 219 **RESULTS**

### 221 ***Patient characteristics***

222  
223 In total, we identified 179,666 patients with at least one dose of COVID-19 vaccine in January-May 2021:  
224 121,771 patients for Pfizer-BioNTech, 52,728 for Moderna and 5,167 for Janssen (Table 1). The sample  
225 included patients from all age groups, with or without co-morbidities captured in inpatient and outpatient  
226 settings.



1  
2  
3 227 We observed that unexposed patients (Table 1) were on average younger and had fewer co-morbidities  
4 228 and less exposure to various drugs prior to matching. We were able to achieve balance on all covariates  
5 229 (up to 54,987 covariates, standardized difference of means less than 0.1) with propensity score matching.  
6 230 Figure 1 presents the covariate balance and propensity score balance plots showing that anchoring  
7 231 unvaccinated patients on a date allowed us to achieve better balance compared to anchoring patients on a  
8 232 visit.  
9 233

10  
11  
12  
13  
14 234 Patients vaccinated with Pfizer-BioNTech had a similar distribution of baseline characteristics compared  
15 235 to the patients vaccinated with Moderna but differed from the patients vaccinated with Janssen. On  
16 236 average, the latter group was older, had more patients with race recorded as Black, and had more co-  
17 237 morbidities such as diabetes mellitus or hypertensive disorder (Table 1).  
18  
19 238

20  
21  
22 239 When investigating the vaccination pathways, we discovered that 112,963 patients (93% of patients with  
23 240 at least one dose of Pfizer-BioNTech) had 2 doses of Pfizer-BioNTech and 42,384 (80%) patients had 2  
24 241 doses of Moderna. We found 344 and 291 patients with 3 doses of the corresponding vaccines and 440  
25 242 patients having mixed Pfizer-BioNTech, Moderna and Janssen vaccines in different combinations.  
26  
27 243

28  
29  
30 244 Within our database, Moderna was administered early on with a peak in January 2021 (Figure 2), while  
31 245 Pfizer-BioNTech and Janssen vaccinations peaked in April. It was reflected in the follow-up time with  
32 246 Moderna patients having on average longer follow-up with some individuals having up to 5.8 months of  
33 247 post-observation.  
34  
35 248

### 36 249 *Main week-by-week effectiveness analysis*

37  
38  
39 250

40  
41 251 Figure 3 shows vaccine effectiveness over six 7-day intervals for patients vaccinated with at least one  
42 252 dose of Pfizer-BioNTech or Moderna (160,114 patients) compared to unvaccinated patients (115,689).  
43 253 Due to the small sample size, we were not able to obtain stable week-by-week estimates for Janssen.  
44  
45 254

46  
47 255 While week one was characterized by unexpectedly high effectiveness (58%, 95% CI 45-69% against  
48 256 COVID-19 infection and 72%, 95% CI 57-83% against COVID-19 associated hospitalization), we  
49 257 observed plausible increasing effectiveness beginning week 2 with the effectiveness on week 6  
50 258 approximating 84% (95% CI 72-91%) for COVID-19 infection and 86% (95% CI 69-95) for COVID-19-  
51 259 associated hospitalization.  
52  
53  
54 260

1  
2  
3 261 We then looked at the week one COVID-19 infection cases to explain high effectiveness (Figure 4). A  
4 262 chart review of week one positive COVID-19 tests revealed a high proportion of unvaccinated patients  
5 263 seeking care related to COVID-19 symptoms or COVID-19 exposure (85% in total) compared to only  
6 264 69% of vaccinated patients. Initial healthcare encounters in vaccinated population were oftentimes related  
7 265 to other medical reasons such as co-morbid conditions or surgeries (39% compared to 21% in  
8 266 unvaccinated population, Appendix 5). Moreover, an observed gap between symptom onset and an initial  
9 267 healthcare encounter was more pronounced in the vaccinated cohort as the patients attributed their  
10 268 symptoms to temporal vaccine side effects as opposed to COVID-19 infection.  
11 269

12 270 When looking at the severity of COVID-19 symptoms at the initial encounter during week one after the  
13 271 index date, we observed that the unvaccinated cohort had a higher proportion of asymptomatic cases  
14 272 (39% compared to 11%) while the vaccinated population had more severe or mild cases (34% and 48%  
15 273 respectively).  
16 274

### 17 275 *Secondary analysis*

18 276

19 277 As cohort analysis allows us to construct Kaplan-Meier curves to assess effectiveness over time, we also  
20 278 looked at the effectiveness during the year after the first dose (Appendix 6-8). We observed similar trends  
21 279 with all three vaccines being less effective during the first month after the first dose. After that, Pfizer-  
22 280 BioNTech and Moderna were highly effective against both COVID-19 infection and COVID-19  
23 281 associated hospitalization, while Janssen vaccine exhibited a wide range of effectiveness (Appendix 9).  
24 282

25 283 The results for fully vaccinated patients with time-at-risk starting at the full vaccination matched the  
26 284 results of the clinical trials for corresponding vaccines (detailed estimates are provided in Appendix 10  
27 285 and 11).  
28 286

29 287 Our initial design included a positive COVID-19 test or a diagnostic code as an outcome. Upon further  
30 288 case examination, we discovered that COVID-19 diagnostic codes in the CUIMC data were partially  
31 289 assigned to the patients with negative COVID-19 tests on or immediately following the date of diagnosis.  
32 290 In that case, ICD10CM code U07.1 “Disease caused by Severe acute respiratory syndrome coronavirus 2”  
33 291 was entered in the system for billing purposes (COVID-19 molecular or antibody tests) or for COVID-19  
34 292 sequelae. We, therefore, focused on positive COVID-19 test only for our primary outcome, which led to  
35 293 higher effectiveness for all vaccines compared to using both positive test and diagnosis (Appendix 9).  
36 294

1  
2  
3 295 Finally, exclusion of patients with prior COVID-19 infection in our main analysis resulted in higher  
4 296 effectiveness. Inclusion of patients regardless of their prior COVID-19 status led to a small decrease in  
5  
6 297 observed effectiveness (Appendix 12) for both COVID-19 infection and hospitalization in patients  
7  
8 298 vaccinated with Moderna or Janssen.

9 299

## 10 300 **DISCUSSION**

11 301

12  
13  
14 302 In this retrospective cohort study, we examined the effectiveness of COVID-19 mRNA vaccines over six  
15  
16 303 7-day intervals after the first dose. We scrutinized the effectiveness of the mRNA vaccines following the  
17  
18 304 first dose and confirmed the findings of moderate vaccine effectiveness during the first two weeks. For  
19  
20 305 week one following the first dose we discovered previously uncaptured differential biases in vaccinated  
21  
22 306 and unvaccinated populations resulting in high vaccine effectiveness. Other researchers suggested that the  
23  
24 307 difference between vaccinated and unvaccinated groups can be mitigated by adjusting for previous  
25  
26 308 healthcare utilization such as number of visits before baseline, co-morbidities or prior vaccination  
27  
28 309 behavior (6,13,24). Nevertheless, the confounding we observed remains even upon controlling for a large  
29  
30 310 number of covariates including those above.

31 311

32 312 Vaccination directly influenced the attitude of patients towards their symptoms, causing a delay in  
33  
34 313 seeking care and a higher symptom severity threshold needed to seek care or get tested. On contrary,  
35  
36 314 vaccinated patients in other studies had higher rates of testing compared to unvaccinated (20,38). This  
37  
38 315 indicates that patients' attitude toward risk of infection and testing may vary geographically and over  
39  
40 316 time. Similarly, frequency of testing may depend on local policies and practices.

41 317

42 318 In unvaccinated patients, mild COVID-19 related symptoms were the reason to seek care; in vaccinated  
43  
44 319 patients such cases were mainly captured upon seeking outpatient and inpatient care for other conditions.  
45  
46 320 For example, vaccinated patients could be hospitalized for elective surgery or delivery and be tested  
47  
48 321 positive for COVID-19 on the day of admission or later on. Differential symptom severity was previously  
49  
50 322 reported for other vaccines (39) and may affect any observational study that uses hospitalization as a  
51  
52 323 surrogate for COVID-19 severity as it can be hard to accurately identify the main reason for  
53  
54 324 hospitalization in structured data.

55 325

56 326 Previous research suggested that vaccinated patients do not have an increase in the number of cases  
57  
58 327 immediately following vaccination as they are unlikely to get vaccinated if sick (9,40). Our review of the

1  
2  
3 328 cases in week one adds to ‘healthy vaccinee’ effect by showing that vaccinated patients are more likely to  
4 329 attribute their symptoms to common vaccine side effects and, therefore, are less likely to seek care.

5  
6 330  
7  
8 331 Nevertheless, even when this differential bias is present, the estimates of the COVID-19 vaccine  
9 332 effectiveness in subsequent weeks still match the results of the RCTs. This indicates that high  
10 333 effectiveness during week one following vaccination does not necessarily undermine the estimates of  
11 334 subsequent vaccine effectiveness. On the other hand, we argue against using estimates of vaccine  
12 335 effectiveness within a short period after the vaccination as a negative control as the differences between  
13 336 the groups observed in this study are likely to be time-variant and may diminish over time (41).

14 337  
15  
16 338 Our secondary analyses discovered several challenges and potential biases that must be accounted for  
17 339 when conducting vaccine effectiveness studies on observational data. First, we observed that outcome  
18 340 definitions are prone to measurement error, which has not been studied thoroughly. Some of the published  
19 341 studies used ICD-10 or ICD-10(CM) codes to identify COVID-19 outcomes (42–44). We found that the  
20 342 specifics of data capture and billing processes were associated with some patients having assigned  
21 343 COVID-19 diagnosis codes for billing for tests rather than as an indicator of active disease. Another  
22 344 reason for assigning the code was COVID-19 sequela, where the actual date of COVID-19 infection could  
23 345 have been anywhere from 6 months to a couple of weeks in the past. Some researchers have previously  
24 346 reported high positive predictive value of ICD-10 diagnostic codes for COVID-19, which points out that  
25 347 index date misclassification should be scrutinized in each institution participating in the analysis to make  
26 348 valid inferences (45,46).

27 349  
28  
29 350 Second, inclusion or exclusion of patients with prior COVID-infection influenced estimated effectiveness.  
30 351 We observed that inclusion of patients with prior COVID-19 leads to lower effectiveness for all vaccines  
31 352 regardless of the outcome definition.

32 353  
33  
34 354 Third, an appropriate index event (anchor) for the unvaccinated cohort must be chosen to represent a  
35 355 counterfactual for vaccination (29,47). In our study, we confirmed that an arbitrary date represents a  
36 356 better counterfactual than a medical visit for COVID-19 vaccination, which is reflected in propensity  
37 357 score balance and covariate balance. Nevertheless, other institutions may have different vaccination  
38 358 pathways such as vaccination on discharge, which can make a visit a better counterfactual for vaccination.  
39 359 More generally, completeness of vaccination data capture is a crucial feature that influences the  
40 360 robustness of the study. While CUIMC data ensures complete exposure capture by linking EHR to the

1  
2  
3 361 City and State Registries, the researchers should exhibit caution with conducting studies on the data  
4 362 sources with unknown vaccination capture.

5 363  
6  
7  
8 364 In general, our findings support the RCTs and previously published post-marketing studies for all three  
9 365 vaccines. Larger sample size for patients vaccinated with COVID-19 mRNA vaccines allowed us to have  
10 366 more power, which resulted in overlapping yet narrower confidence intervals compared to the RCTs. On  
11 367 the other hand, our study had fewer patients with the Janssen vaccine, which resulted in wider yet  
12 368 overlapping intervals compared to the Janssen's vaccine RCT (1,2,7). Nevertheless, an indirect  
13 369 comparison of these vaccines may not be accurate due to the differences in the populations we observed  
14 370 in our study. First, patients vaccinated with Janssen were substantially different from mRNA patients: on  
15 371 average, they were older, had a higher proportion of patients with race recorded as Black and had more  
16 372 comorbidities. Therefore, comparative effectiveness studies of Janssen and mRNA vaccines require  
17 373 robust techniques such as large-scale propensity matching to ensure valid comparison. Second, while  
18 374 Moderna and Pfizer patients had similar baseline characteristics, the temporal distribution of vaccinations  
19 375 in CUIMC data differ. Moderna vaccine was administered early on in 2021 with the peak in January,  
20 376 while Pfizer vaccination peaked in April. Given the varying baseline COVID-19 prevalence, a  
21 377 comparison of mRNA vaccines requires matching patients on calendar month to account for this potential  
22 378 bias. These vaccines also had different administration pathways in our system. As opposed to Pfizer  
23 379 vaccine, which was administered at Columbia University Irving Medical Center/New York-Presbyterian  
24 380 sites to all patients over a prolonged period, Moderna vaccination was performed elsewhere and recorded  
25 381 for actively observed patients. Such patients were more likely to get tested or receive care outside of our  
26 382 healthcare system.

27 383

## 28 384 **LIMITATIONS**

29 385

30 386 Due to observational nature of the study, the data sources may not have complete capture of patient  
31 387 conditions as the patients could seek care outside of the hospital system. While our outcome phenotype  
32 388 algorithms may be subject to measurement error, we provided additional analyses with alternative  
33 389 outcome definitions. Exposure misclassification was mitigated by having free and available COVID-19  
34 390 testing and COVID-19 vaccination in Columbia University Irving Medical Center/New York-  
35 391 Presbyterian sites as well as by having data capture from New York City and State Immunization  
36 392 Registries. Along with availability of testing, COVID-19 baseline infection rate difference was mitigated  
37 393 by matching the exposed and unexposed groups on the index date and using the index month as a  
38 394 covariate in propensity score model. We attempted to address potential differences between exposed and

1  
2  
3 395 unexposed groups by selecting a large number of covariates in our propensity score model such as  
4 396 number of visits, procedure and drug utilization, prior vaccine behavior, race and others. Nevertheless, we  
5 397 did not have data for social interactions, adherence to preventive measures and policies, which could  
6 398 affect likelihood of COVID-19 infection and testing.  
9 399

11 400 The results of the study may not be generalizable to other countries or settings with different vaccine  
12 401 administration practices and policies. Finally, the study period did not allow us to stratify the results by  
13 402 COVID-19 variants, which limits generalizability of findings to other variants.  
16 403  
17 404

## 19 405 **CONCLUSIONS**

20 406  
22 407 Observational data can be used to ascertain vaccine effectiveness if potential biases such as exposure and  
23 408 outcome misclassification are accounted for, and appropriate anchoring event is selected. When analyzing  
24 409 vaccine effectiveness researchers need to scrutinize the data to ensure that compared groups exhibit  
25 410 similar health seeking behavior and are equally likely to be captured in the data and report their findings.  
26 411 Specifically for COVID-19 vaccines, an arbitrary date for the index date in unvaccinated patients  
27 412 represents a better counterfactual for vaccination than a healthcare encounter. Effectiveness over the first  
28 413 week(s) after the vaccination should be reported even though low or high effectiveness immediately after  
29 414 the vaccination may not invalidate study findings. Given the difference in temporal trends of vaccine  
30 415 exposure and baseline characteristics, there is a need for large-scale direct comparison of vaccines to  
31 416 examine comparative effectiveness.  
38 417

## 39 418 **DECLARATION**

40 419  
42 420 **Author contributions**

44 421  
45 422 GH designed and supervised the study. AO executed the study, interpreted the results, and drafted the  
46 423 manuscript. GH and AO reviewed the manuscript, approved the final version and had final responsibility  
47 424 for the decision to submit for publication.  
50 425

## 52 426 **Funding**

53 427  
54  
55  
56  
57  
58  
59  
60

1  
2  
3 428 US National Library of Medicine (R01 LM006910), US Food and Drug Administration CBER BEST  
4 429 Initiative (75F40120D00039).

5  
6 430

7  
8 431 **Declaration of interests**

9 432

10  
11 433 All authors have completed the ICMJE disclosure form (available on request from the corresponding  
12 434 author). GH and AO receive funding from the US National Institutes of Health (NIH) and the US Food and  
13 435 Drug Administration.  
14

15 436

16  
17 437 **Ethical approval**

18 438

19  
20 439 The protocol for this research was approved by the Columbia University Institutional Review Board  
21 440 (AAA07805).  
22

23 441

24  
25 442 **Data sharing**

26 443

27  
28 444 Patient-level data cannot be shared without approval from data custodians due to local information  
29 445 governance and data protection regulations.  
30

31 446

32  
33 447 **Transparency declaration**

34 448

35  
36 449 The lead authors affirms that this manuscript is an honest, accurate, and transparent account of the study  
37 450 being reported; that no important aspects of the study have been omitted; and that any discrepancies from  
38 451 the study as planned (and, if relevant, registered) have been explained.  
39

40 452

41  
42 453 **Acknowledgment**

43  
44 454 We would like to acknowledge Patrick Ryan, an employee of Janssen Research and Development,  
45 455 Titusville, New Jersey, for his thoughtful feedback on the study.  
46

47 456

48 457

49 458

50 459

51 460

52 461  
53  
54  
55  
56  
57  
58  
59  
60

## 462 REFERENCES

- 463
- 464 1. Sadoff J, Gray G, Vandebosch A, Cárdenas V, Shukarev G, Grinsztejn B, et al. Safety and Efficacy  
465 of Single-Dose Ad26.COV2.S Vaccine against Covid-19. *N Engl J Med*. 2021 Jun  
466 10;384(23):2187–201.
- 467 2. Baden LR, El Sahly HM, Essink B, Kotloff K, Frey S, Novak R, et al. Efficacy and Safety of the  
468 mRNA-1273 SARS-CoV-2 Vaccine. *N Engl J Med*. 2021 Feb 4;384(5):403–16.
- 469 3. Polack FP, Thomas SJ, Kitchin N, Absalon J, Gurtman A, Lockhart S, et al. Safety and Efficacy of  
470 the BNT162b2 mRNA Covid-19 Vaccine. *N Engl J Med*. 2020 Dec 31;383(27):2603–15.
- 471 4. Voysey M, Clemens SAC, Madhi SA, Weckx LY, Folegatti PM, Aley PK, et al. Safety and efficacy  
472 of the ChAdOx1 nCoV-19 vaccine (AZD1222) against SARS-CoV-2: an interim analysis of four  
473 randomised controlled trials in Brazil, South Africa, and the UK. *The Lancet*. 2021  
474 Jan;397(10269):99–111.
- 475 5. Thompson MG, Stenehjem E, Grannis S, Ball SW, Naleway AL, Ong TC, et al. Effectiveness of  
476 Covid-19 Vaccines in Ambulatory and Inpatient Care Settings. *N Engl J Med*. 2021 Sep  
477 8;NEJMoa2110362.
- 478 6. Tartof SY, Slezak JM, Fischer H, Hong V, Ackerson BK, Ranasinghe ON, et al. Effectiveness of  
479 mRNA BNT162b2 COVID-19 vaccine up to 6 months in a large integrated health system in the  
480 USA: a retrospective cohort study. *The Lancet*. 2021 Oct;398(10309):1407–16.
- 481 7. Haas EJ, Angulo FJ, McLaughlin JM, Anis E, Singer SR, Khan F, et al. Impact and effectiveness of  
482 mRNA BNT162b2 vaccine against SARS-CoV-2 infections and COVID-19 cases, hospitalisations,  
483 and deaths following a nationwide vaccination campaign in Israel: an observational study using  
484 national surveillance data. *The Lancet*. 2021 May;397(10287):1819–29.
- 485 8. Kissling E, Hooiveld M, Sandonis Martín V, Martínez-Baz I, William N, Vilcu AM, et al. Vaccine  
486 effectiveness against symptomatic SARS-CoV-2 infection in adults aged 65 years and older in  
487 primary care: I-MOVE-COVID-19 project, Europe, December 2020 to May 2021. *Eurosurveillance*  
488 [Internet]. 2021 Jul 22 [cited 2021 Sep 23];26(29). Available from:  
489 <https://www.eurosurveillance.org/content/10.2807/1560-7917.ES.2021.26.29.2100670>
- 490 9. Dagan N, Barda N, Kepten E, Miron O, Perchik S, Katz MA, et al. BNT162b2 mRNA Covid-19  
491 Vaccine in a Nationwide Mass Vaccination Setting. *N Engl J Med*. 2021 Apr 15;384(15):1412–23.
- 492 10. Chemaitelly H, Yassine HM, Benslimane FM, Al Khatib HA, Tang P, Hasan MR, et al. mRNA-  
493 1273 COVID-19 vaccine effectiveness against the B.1.1.7 and B.1.351 variants and severe COVID-  
494 19 disease in Qatar. *Nat Med*. 2021 Sep;27(9):1614–21.
- 495 11. Lopez Bernal J, Andrews N, Gower C, Gallagher E, Simmons R, Thelwall S, et al. Effectiveness of  
496 Covid-19 Vaccines against the B.1.617.2 (Delta) Variant. *N Engl J Med*. 2021 Aug 12;385(7):585–  
497 94.
- 498 12. Bedston S, Akbari A, Jarvis CI, Lowthian E, Torabi F, North L, et al. COVID-19 vaccine uptake,  
499 effectiveness, and waning in 82,959 health care workers: A national prospective cohort study in  
500 Wales. *Vaccine*. 2022 Feb;40(8):1180–9.



- 1  
2  
3 501 13. Waxman JG, Makov-Assif M, Reis BY, Netzer D, Balicer RD, Dagan N, et al. Comparing COVID-  
4 502 19-related hospitalization rates among individuals with infection-induced and vaccine-induced  
5 503 immunity in Israel. *Nat Commun.* 2022 Dec;13(1):2202.  
6  
7 504 14. Gazit S, Shlezinger R, Perez G, Lotan R, Peretz A, Ben-Tov A, et al. The Incidence of SARS-CoV-  
8 505 2 Reinfection in Persons With Naturally Acquired Immunity With and Without Subsequent Receipt  
9 506 of a Single Dose of BNT162b2 Vaccine: A Retrospective Cohort Study. *Ann Intern Med.* 2022  
10 507 May;175(5):674–81.  
11  
12 508 15. Feikin DR, Higdon MM, Abu-Raddad LJ, Andrews N, Araos R, Goldberg Y, et al. Duration of  
13 509 effectiveness of vaccines against SARS-CoV-2 infection and COVID-19 disease: results of a  
14 510 systematic review and meta-regression. *The Lancet.* 2022 Mar;399(10328):924–44.  
15 511  
16 512 16. Tartof SY, Slezak JM, Puzniak L, Hong V, Frankland TB, Ackerson BK, et al. Effectiveness of a  
17 513 third dose of BNT162b2 mRNA COVID-19 vaccine in a large US health system: A retrospective  
18 cohort study. *The Lancet Regional Health - Americas.* 2022 May;9:100198.  
19  
20 514 17. Price AM, Olson SM, Newhams MM, Halasa NB, Boom JA, Sahni LC, et al. BNT162b2 Protection  
21 515 against the Omicron Variant in Children and Adolescents. *N Engl J Med.* 2022 May  
22 516 19;386(20):1899–909.  
23  
24 517 18. Dean NE, Hogan JW, Schnitzer ME. Covid-19 Vaccine Effectiveness and the Test-Negative  
25 518 Design. *N Engl J Med.* 2021 Oct 7;385(15):1431–3.  
26  
27 519 19. Polinski JM, Weckstein AR, Batech M, Kabelac C, Kamath T, Harvey R, et al. Effectiveness of the  
28 520 Single-Dose Ad26.COVS.2.S COVID Vaccine [Internet]. *Infectious Diseases (except HIV/AIDS);*  
29 521 2021 Sep [cited 2021 Sep 23]. Available from:  
30 522 <http://medrxiv.org/lookup/doi/10.1101/2021.09.10.21263385>  
31  
32 523 20. Ioannidis JPA. Factors influencing estimated effectiveness of COVID-19 vaccines in non-  
33 524 randomised studies. *BMJ EBM.* 2022 Mar 25;bmjebm-2021-111901.  
34  
35 525 21. Fell DB, Dimitris MC, Hutcheon JA, Ortiz JR, Platt RW, Regan AK, et al. Guidance for design and  
36 526 analysis of observational studies of fetal and newborn outcomes following COVID-19 vaccination  
37 527 during pregnancy. *Vaccine.* 2021 Apr;39(14):1882–6.  
38  
39 528 22. Skowronski D. Safety and Efficacy of the BNT162b2 mRNA Covid-19 Vaccine: a letter to the  
40 529 Editor. *N Engl J Med.* 2021 Feb 17;384(16):1576-.  
41  
42 530 23. Tabak YP, Sun X, Brennan TA, Chaguturu SK. Incidence and Estimated Vaccine Effectiveness  
43 531 Against Symptomatic SARS-CoV-2 Infection Among Persons Tested in US Retail Locations, May  
44 532 1 to August 7, 2021. *JAMA Netw Open.* 2021 Dec 22;4(12):e2143346.  
45  
46 533 24. Barda N, Dagan N, Cohen C, Hernán MA, Lipsitch M, Kohane IS, et al. Effectiveness of a third  
47 534 dose of the BNT162b2 mRNA COVID-19 vaccine for preventing severe outcomes in Israel: an  
48 535 observational study. *The Lancet.* 2021 Dec;398(10316):2093–100.  
49  
50 536 25. Hall VJ, Foulkes S, Saei A, Andrews N, Oguti B, Charlett A, et al. COVID-19 vaccine coverage in  
51 537 health-care workers in England and effectiveness of BNT162b2 mRNA vaccine against infection  
52 538 (SIREN): a prospective, multicentre, cohort study. *The Lancet.* 2021 May;397(10286):1725–35.  
53  
54  
55  
56  
57  
58  
59  
60

- 1  
2  
3 539 26. Pilishvili T, Gierke R, Fleming-Dutra KE, Farrar JL, Mohr NM, Talan DA, et al. Effectiveness of  
4 540 mRNA Covid-19 Vaccine among U.S. Health Care Personnel. *N Engl J Med*. 2021 Dec  
5 541 16;385(25):e90.  
6  
7 542 27. OMOP Common Data Model [Internet]. GitHub. [cited 2020 Feb 11]. Available from:  
8 543 <https://github.com/OHDSI/CommonDataModel>  
9  
10 544 28. Ostropolets A, Ryan PB, Schuemie MJ, Hripcsak G. Characterizing Anchoring Bias in Vaccine  
11 545 Comparator Selection Due to Health Care Utilization With COVID-19 and Influenza: Observational  
12 546 Cohort Study. *JMIR Public Health Surveill*. 2022 Jun 17;8(6):e33099.  
13  
14 547 29. Ostropolets A, Li X, Makadia R, Rao G, Rijnbeek PR, Duarte-Salles T, et al. Factors Influencing  
15 548 Background Incidence Rate Calculation: Systematic Empirical Evaluation Across an International  
16 549 Network of Observational Databases. *Front Pharmacol*. 2022 Apr 26;13:814198.  
17  
18 550 30. Tian Y, Schuemie MJ, Suchard MA. Evaluating large-scale propensity score performance through  
19 551 real-world and synthetic data experiments. *International Journal of Epidemiology*. 2018 Dec  
20 552 1;47(6):2005–14.  
21  
22 553 31. Fortin SP, Johnston SS, Schuemie MJ. Applied comparison of large-scale propensity score  
23 554 matching and cardinality matching for causal inference in observational research. *BMC Med Res*  
24 555 *Methodol*. 2021 Dec;21(1):174.  
25  
26 556 32. Schuemie MJ, Ryan PB, Hripcsak G, Madigan D, Suchard MA. Improving reproducibility by using  
27 557 high-throughput observational studies with empirical calibration. *Phil Trans R Soc A*. 2018 Sep  
28 558 13;376(2128):20170356.  
29  
30 559 33. Schuemie MJ, Ryan PB, DuMouchel W, Suchard MA, Madigan D. Interpreting observational  
31 560 studies: why empirical calibration is needed to correct  $p$ -values. *Statistics in Medicine*. 2014 Jan  
32 561 30;33(2):209–18.  
33  
34 562 34. Suchard MA, Simpson SE, Zorych I, Ryan P, Madigan D. Massive Parallelization of Serial  
35 563 Inference Algorithms for a Complex Generalized Linear Model. *ACM Transactions on Modeling*  
36 564 *and Computer Simulation*. 2013 Jan;23(1):1–17.  
37  
38 565 35. Schuemie MJ, Ryan PB, Pratt N, Chen R, You SC, Krumholz HM, et al. Principles of Large-scale  
39 566 Evidence Generation and Evaluation across a Network of Databases (LEGEND). *Journal of the*  
40 567 *American Medical Informatics Association*. 2020 Aug 1;27(8):1331–7.  
41  
42 568 36. Austin PC. Using the Standardized Difference to Compare the Prevalence of a Binary Variable  
43 569 Between Two Groups in Observational Research. *Communications in Statistics - Simulation and*  
44 570 *Computation*. 2009 May 14;38(6):1228–34.  
45  
46 571 37. The Knowledge Base workgroup of the Observational Health Data Sciences and Informatics  
47 572 (OHDSI) collaborative. Large-scale adverse effects related to treatment evidence standardization  
48 573 (LAERTES): an open scalable system for linking pharmacovigilance evidence sources with clinical  
49 574 data. *J Biomed Semant*. 2017 Dec;8(1):11.  
50  
51 575 38. Glasziou P, McCaffery K, Cvejic E, Batcup C, Ayre J, Pickles K, et al. Testing behaviour may bias  
52 576 observational studies of vaccine effectiveness [Internet]. *Infectious Diseases (except HIV/AIDS)*;  
53  
54  
55  
56  
57  
58  
59  
60

- 1  
2  
3 577 2022 Jan [cited 2022 May 26]. Available from:  
4 578 <http://medrxiv.org/lookup/doi/10.1101/2022.01.17.22269450>  
5
- 6 579 39. Lewnard JA, Tedijanto C, Cowling BJ, Lipsitch M. Measurement of Vaccine Direct Effects Under  
7 580 the Test-Negative Design. *American Journal of Epidemiology*. 2018 Dec 1;187(12):2686–97.  
8
- 9 581 40. Renschmidt C, Wichmann O, Harder T. Frequency and impact of confounding by indication and  
10 582 healthy vaccinee bias in observational studies assessing influenza vaccine effectiveness: a  
11 583 systematic review. *BMC Infect Dis*. 2015 Dec;15(1):429.  
12
- 13 584 41. Hitchings MDT, Lewnard JA, Dean NE, Ko AI, Ranzani OT, Andrews JR, et al. Use of recently  
14 585 vaccinated individuals to detect bias in test-negative case–control studies of COVID-19 vaccine  
15 586 effectiveness. *Epidemiology [Internet]*. 2022 Apr 1 [cited 2022 May 27];Publish Ahead of Print.  
16 587 Available from: <https://journals.lww.com/10.1097/EDE.0000000000001484>  
17
- 18 588 42. Hadi YB, Thakkar S, Shah-Khan SM, Hutson W, Sarwari A, Singh S. COVID-19 Vaccination Is  
19 589 Safe and Effective in Patients With Inflammatory Bowel Disease: Analysis of a Large Multi-  
20 590 institutional Research Network in the United States. *Gastroenterology*. 2021 Oct;161(4):1336-  
21 591 1339.e3.  
22
- 23 592 43. Nunes B, Rodrigues AP, Kislava I, Cruz C, Peralta-Santos A, Lima J, et al. mRNA vaccine  
24 593 effectiveness against COVID-19-related hospitalisations and deaths in older adults: a cohort study  
25 594 based on data linkage of national health registries in Portugal, February to August 2021.  
26 595 *Eurosurveillance [Internet]*. 2021 Sep 23 [cited 2022 May 25];26(38). Available from:  
27 596 <https://www.eurosurveillance.org/content/10.2807/1560-7917.ES.2021.26.38.2100833>  
28 597  
29
- 30 597 44. Wright BJ, Tideman S, Diaz GA, French T, Parsons GT, Robicsek A. Comparative vaccine  
31 598 effectiveness against severe COVID-19 over time in US hospital administrative data: a case-control  
32 599 study. *The Lancet Respiratory Medicine*. 2022 Feb;S221326002200042X.  
33
- 34 600 45. Bodilsen J, Leth S, Nielsen SL, Holler JG, Benfield T, Omland LH. Positive Predictive Value of  
35 601 ICD-10 Diagnosis Codes for COVID-19. *CLEP*. 2021 May;Volume 13:367–72.  
36
- 37 602 46. Lynch KE, Viernes B, Gatsby E, DuVall SL, Jones BE, Box TL, et al. Positive Predictive Value of  
38 603 COVID-19 ICD-10 Diagnosis Codes Across Calendar Time and Clinical Setting. *CLEP*. 2021  
39 604 Oct;Volume 13:1011–8.  
40
- 41 605 47. Ostropelets A, Ryan PB, Schuemie MJ, Hripcsak G. Differential anchoring effects of vaccination  
42 606 comparator selection: characterizing a potential bias due to healthcare utilization in COVID-19  
43 607 versus influenza [Internet]. *Epidemiology*; 2021 Oct [cited 2021 Nov 7]. Available from:  
44 608 <http://medrxiv.org/lookup/doi/10.1101/2021.10.07.21264711>  
45 609  
46  
47  
48  
49  
50  
51  
52  
53  
54  
55  
56  
57  
58  
59  
60

1  
2  
3 615  
4  
5 616 **Figure 1.** Distribution of vaccination month for COVID-19 vaccines. Black dots represent the number of  
6 617 incident COVID-19 cases (defined as a positive test) in each month.  
7  
8 618

9 619 **Figure 2.** Diagnostics for the effectiveness study comparing the cohort vaccinated with at least one dose  
10 620 of Pfizer, Moderna or Janssen COVID-19 vaccines and unvaccinated cohort anchored on a date or on a  
11 621 visit: (A) covariate balance before and after propensity score matching, (B) preference score balance and  
12 622 (C) effect of negative control calibration displaying effect estimate and standard error.

13  
14 623 In (A), each dot represents the standardized difference of the means for a single covariate before and after  
15 624 stratification on the propensity score.

16 625 In (C), each blue dot is a negative control. The area below the dashed line indicates estimates with  $p < 0.05$   
17 626 and the orange area indicates estimates with calibrated  $p < 0.05$ .  
18 627

19 628 **Figure 3.** Effectiveness of Pfizer-BioNTech and Moderna vaccines over six 7-day intervals after 1<sup>st</sup> dose,  
20 629 % and 95% CI for COVID-19 infection (A) and COVID-19 hospitalization (B).  
21 630

22 631 **Figure 4.** Chart review of COVID-19 cases (defined as a positive COVID-19 test) during week one,  
23 632 vaccinated and unvaccinated patients.  
24 633  
25 634

**Table 1.** Patient baseline characteristics for patients with at least one dose of a COVID-19 vaccine and the unexposed patients, before and after propensity score matching.

| Characteristic                                  | Before matching |              |           | After matching |              |           |
|-------------------------------------------------|-----------------|--------------|-----------|----------------|--------------|-----------|
|                                                 | Vaccinated      | Unvaccinated | Std. diff | Vaccinated     | Unvaccinated | Std. diff |
| <i>Pfizer-BioNTech COVID-19 vaccine</i>         |                 |              |           |                |              |           |
| Patients, n                                     | 121,771         | 164,997      |           | 101,109        | 101,111      |           |
| Follow-up, days. Median (IQR)                   | 107 (80 – 137)  | 104 (71-137) |           | 107 (78-149)   | 107 (79-140) |           |
| COVID-19 diagnosis or positive COVID-19 test, n |                 |              |           | 822            | 1355         |           |
| Positive COVID-19 test, n                       |                 |              |           | 231            | 786          |           |
| <i>Age group, %</i>                             |                 |              |           |                |              |           |
| 10-19                                           | 4.2             | 10.8         | -0.25     | 4.8            | 4.3          | 0.02      |
| 20-49                                           | 37.2            | 42.6         | -0.11     | 40.3           | 40.1         | 0         |
| 50-64                                           | 23.9            | 20.3         | 0.09      | 23.6           | 23.7         | 0         |
| 65-74                                           | 18.8            | 12.6         | 0.17      | 15.8           | 16.6         | -0.02     |
| 75-84                                           | 11.3            | 8.9          | 0.08      | 10.6           | 10.7         | 0         |
| >84                                             | 4.1             | 3.8          | 0.02      | 4.2            | 4.1          | 0.01      |
| <i>Gender, %</i>                                |                 |              |           |                |              |           |
| Female                                          | 63.7            | 57.8         | 0.12      | 61.4           | 62           | -0.01     |
| <i>Race, %</i>                                  |                 |              |           |                |              |           |
| race = Asian                                    | 3.8             | 2.6          | 0.07      | 3.5            | 3.4          | 0.01      |
| race = Black or African American                | 12.4            | 14.2         | -0.05     | 12.6           | 12.2         | 0.01      |
| race = White                                    | 40.5            | 35.1         | 0.11      | 39.3           | 39.5         | 0         |
| <i>Medical history, %</i>                       |                 |              |           |                |              |           |
| Chronic liver disease                           | 0.6             | 0.6          | 0         | 0.5            | 0.5          | 0         |
| Chronic obstructive lung disease                | 1.3             | 1            | 0.02      | 1              | 1            | 0.01      |
| Dementia                                        | 1.2             | 1.1          | 0         | 1.1            | 1            | 0.01      |
| Depressive disorder                             | 5.3             | 4            | 0.06      | 4              | 3.7          | 0.02      |

|                                                 |                 |              |       |                |               |       |
|-------------------------------------------------|-----------------|--------------|-------|----------------|---------------|-------|
| Diabetes mellitus                               | 7.1             | 5.2          | 0.08  | 5.7            | 5.4           | 0.01  |
| Human immunodeficiency virus infection          | 1.4             | 1.1          | 0.03  | 1.1            | 1             | 0     |
| Hyperlipidemia                                  | 12.9            | 8.1          | 0.16  | 10.2           | 9.5           | 0.02  |
| Hypertensive disorder*                          | 16              | 11.3         | 0.14  | 13.1           | 12.2          | 0.03  |
| Obesity                                         | 5.1             | 4.9          | 0.01  | 4.4            | 4.1           | 0.02  |
| Osteoarthritis                                  | 7.3             | 4.7          | 0.11  | 5.8            | 5.3           | 0.02  |
| Renal impairment**                              | 3.7             | 3            | 0.04  | 2.9            | 2.7           | 0.01  |
| Cerebrovascular disease                         | 1.7             | 1.4          | 0.02  | 1.5            | 1.4           | 0.01  |
| Heart disease***                                | 8.6             | 7.1          | 0.06  | 7.5            | 7.1           | 0.02  |
| Malignant neoplastic disease                    | 5.3             | 4.5          | 0.04  | 4.7            | 4.3           | 0.02  |
| Charlson comorbidity index, mean (SD)           | 1.75 (3.18)     | 1.69 (3.09)  | -0.01 | 1.70 (3.11)    | 1.63 (3.03)   | -0.01 |
| Influenza vaccination within a year prior       | 10.9            | 7.9          | 0.10  | 7.5            | 6.9           | 0.02  |
| <b>Moderna COVID-19 vaccine</b>                 |                 |              |       |                |               |       |
| Patients, n                                     | 52,728          | 148,795      |       | 50,517         | 50,517        |       |
| Follow-up, days. Median (IQR)                   | 127 (102 – 153) | 123 (99-153) |       | 126 (101- 153) | 126 (102-153) |       |
| COVID-19 diagnosis or positive COVID-19 test, n |                 |              |       | 382            | 786           |       |
| Positive COVID-19 test, n                       |                 |              |       | 94             | 447           |       |
| <b>Age group, %</b>                             |                 |              |       |                |               |       |
| 10-19                                           | 0.5             | 1.7          | -0.12 | 0.5            | 0.4           | 0.01  |
| 20-49                                           | 35.7            | 45.7         | -0.20 | 36.9           | 37.4          | -0.01 |
| 50-64                                           | 21.2            | 23.3         | -0.05 | 21.7           | 21.4          | 0.01  |
| 65-74                                           | 21.3            | 14.4         | 0.18  | 20.6           | 20.5          | 0.00  |
| 75-84                                           | 15.4            | 10           | 0.16  | 14.6           | 14.6          | 0.00  |
| >84                                             | 5.8             | 4.8          | 0.04  | 5.6            | 5.6           | 0.00  |
| <b>Gender, %</b>                                |                 |              |       |                |               |       |
| Female                                          | 64.4            | 58.7         | 0.12  | 64.2           | 64.7          | -0.01 |
| <b>Race, %</b>                                  |                 |              |       |                |               |       |

|                                                 |             |             |       |             |             |       |
|-------------------------------------------------|-------------|-------------|-------|-------------|-------------|-------|
| race = Asian                                    | 4.2         | 2.8         | 0.07  | 4.2         | 4.4         | -0.01 |
| race = Black or African American                | 8.7         | 14.2        | -0.17 | 9           | 8.4         | 0.02  |
| race = White                                    | 48.3        | 34.4        | 0.29  | 46.9        | 47.9        | -0.02 |
| <i>Medical history, %</i>                       |             |             |       |             |             |       |
| Chronic liver disease                           | 0.5         | 0.6         | -0.02 | 0.5         | 0.5         | 0     |
| Chronic obstructive lung disease                | 1.4         | 1.1         | 0.02  | 1.2         | 1.2         | 0     |
| Dementia                                        | 1           | 1.2         | -0.02 | 1           | 0.9         | 0.01  |
| Depressive disorder                             | 4.7         | 3.9         | 0.04  | 4.2         | 4           | 0.01  |
| Diabetes mellitus                               | 6.6         | 5.6         | 0.04  | 6.2         | 5.8         | 0.02  |
| Human immunodeficiency virus infection          | 0.9         | 1.2         | -0.03 | 0.8         | 0.8         | 0     |
| Hyperlipidemia                                  | 14.9        | 8.9         | 0.19  | 13          | 12.6        | 0.01  |
| Hypertensive disorder                           | 16          | 12.4        | 0.1   | 14.7        | 13.9        | 0.02  |
| Obesity                                         | 4           | 4.4         | -0.02 | 3.8         | 3.6         | 0.01  |
| Osteoarthritis                                  | 7.7         | 5.3         | 0.1   | 6.8         | 6.5         | 0.01  |
| Renal impairment                                | 3.5         | 3.3         | 0.01  | 3.3         | 3           | 0.01  |
| Cerebrovascular disease                         | 2.2         | 1.6         | 0.05  | 2           | 1.8         | 0.02  |
| Heart disease                                   | 10.1        | 7.6         | 0.09  | 9.2         | 8.7         | 0.02  |
| Malignant neoplastic disease                    | 6.5         | 5           | 0.07  | 5.9         | 5.5         | 0.02  |
| Charlson comorbidity index, mean (SD)           | 1.62 (2.81) | 1.62 (3.00) | 0.00  | 1.59 (2.80) | 1.59 (2.99) | 0.00  |
| Influenza vaccination within a year prior       | 8.4         | 6.3         | 0.08  | 7.2         | 6.8         | 0.02  |
| <b><i>Janssen COVID-19 vaccine</i></b>          |             |             |       |             |             |       |
| Patients, n                                     | 5,167       | 52,643      |       | 5,031       | 5,031       |       |
| Follow-up, days. Median (IQR)                   | 79 (72-95)  | 79 (72-95)  |       | 79 (72-95)  | 79 (72-95)  |       |
| COVID-19 diagnosis or positive COVID-19 test, n |             |             |       | 31          | 37          |       |
| Positive COVID-19 test, n                       |             |             |       | 8           | 16          |       |
| <i>Age group, %</i>                             |             |             |       |             |             |       |
| 10-19                                           | 0.8         | 0.8         | 0.00  | 0.8         | 0.8         | 0.00  |

|                                           |             |             |       |             |             |       |
|-------------------------------------------|-------------|-------------|-------|-------------|-------------|-------|
| 20-49                                     | 43.9        | 43          | 0.02  | 44.2        | 43.9        | 0.01  |
| 50-64                                     | 31.7        | 31.7        | 0.00  | 31.8        | 31.3        | 0.01  |
| 65-74                                     | 11.6        | 12.2        | -0.02 | 11.5        | 12          | -0.02 |
| 75-84                                     | 7.6         | 7.9         | -0.01 | 7.2         | 7.9         | -0.03 |
| >84                                       | 4.3         | 4.3         | 0.00  | 4.2         | 4           | 0.01  |
| <i>Gender, %</i>                          |             |             |       |             |             |       |
| Female                                    | 63.4        | 63.2        | 0.01  | 63.5        | 61.1        | 0.05  |
| <i>Race, %</i>                            |             |             |       |             |             |       |
| race = Asian                              | 3.6         | 1.7         | 0.12  | 3.7         | 3.6         | 0.01  |
| race = Black or African American          | 15.9        | 15.5        | 0.01  | 15.7        | 15.5        | 0     |
| race = White                              | 37.4        | 35.7        | 0.03  | 37.4        | 37.5        | 0     |
| <i>Medical history, %</i>                 |             |             |       |             |             |       |
| Chronic liver disease                     | 1.1         | 0.7         | 0.05  | 1           | 1.2         | -0.02 |
| Chronic obstructive lung disease          | 2.4         | 1.3         | 0.09  | 2           | 2.2         | -0.01 |
| Dementia                                  | 2.6         | 1.1         | 0.11  | 2.2         | 2.2         | 0     |
| Depressive disorder                       | 8           | 4.8         | 0.13  | 7.1         | 8           | -0.03 |
| Diabetes mellitus                         | 10.3        | 6.2         | 0.15  | 9.5         | 10.2        | -0.02 |
| Human immunodeficiency virus infection    | 1.7         | 1.4         | 0.02  | 1.6         | 1.8         | -0.01 |
| Hyperlipidemia                            | 14.3        | 10.2        | 0.13  | 13.4        | 14.3        | -0.03 |
| Hypertensive disorder                     | 21.4        | 13.8        | 0.2   | 20.1        | 21.7        | -0.04 |
| Obesity                                   | 7.3         | 5.9         | 0.06  | 6.8         | 7.8         | -0.04 |
| Osteoarthritis                            | 8.4         | 6.2         | 0.08  | 7.8         | 8.8         | -0.04 |
| Renal impairment                          | 6.6         | 3.3         | 0.15  | 5.3         | 5.9         | -0.02 |
| Cerebrovascular disease                   | 2.7         | 1.7         | 0.07  | 2.3         | 2.4         | -0.01 |
| Heart disease                             | 11.8        | 8           | 0.13  | 10.3        | 11.7        | -0.04 |
| Malignant neoplastic disease              | 5           | 4.9         | 0     | 4.8         | 5.2         | -0.02 |
| Charlson comorbidity index, mean (SD)     | 1.84 (3.34) | 1.55 (2.96) | -0.07 | 1.56 (3.04) | 1.43 (2.79) | -0.03 |
| Influenza vaccination within a year prior | 12.5        | 8.0         | 0.15  | 10.1        | 11.4        | -0.04 |



1  
2  
3  
4  
5  
6  
7  
8  
9  
10  
11  
12  
13  
14  
15  
16  
17  
18  
19  
20  
21  
22  
23  
24  
25  
26  
27  
28  
29  
30  
31  
32  
33  
34  
35  
36  
37  
38  
39  
40  
41  
42  
43  
44  
45  
46  
47

\* Hypertensive disorder includes primary and secondary hypertension

\*\* Renal impairment includes acute and chronic renal failure (prerenal and renal);

\*\*\* Heart disease includes cardiac arrhythmias, heart valve disorders, coronary arteriosclerosis, heart failure, cardiomyopathies, etc.

For peer review only



Distribution of vaccination month for COVID-19 vaccines. Black dots represent the number of incident COVID-19 cases (defined as a positive test) in each month.

338x190mm (144 x 144 DPI)



23 Diagnostics for the effectiveness study comparing the cohort vaccinated with at least one dose of Pfizer,  
 24 Moderna or Janssen COVID-19 vaccines and unvaccinated cohort anchored on a date or on a visit: (A)  
 25 covariate balance before and after propensity score matching, (B) preference score balance and (C) effect of  
 26 negative control calibration displaying effect estimate and standard error. In (A), each dot represents the  
 27 standardized difference of the means for a single covariate before and after stratification on the propensity  
 28 score. In (C), each blue dot is a negative control. The area below the dashed line indicates estimates with  
 29  $p < 0.05$  and the orange area indicates estimates with calibrated  $p < 0.05$ .

30 625x313mm (78 x 78 DPI)

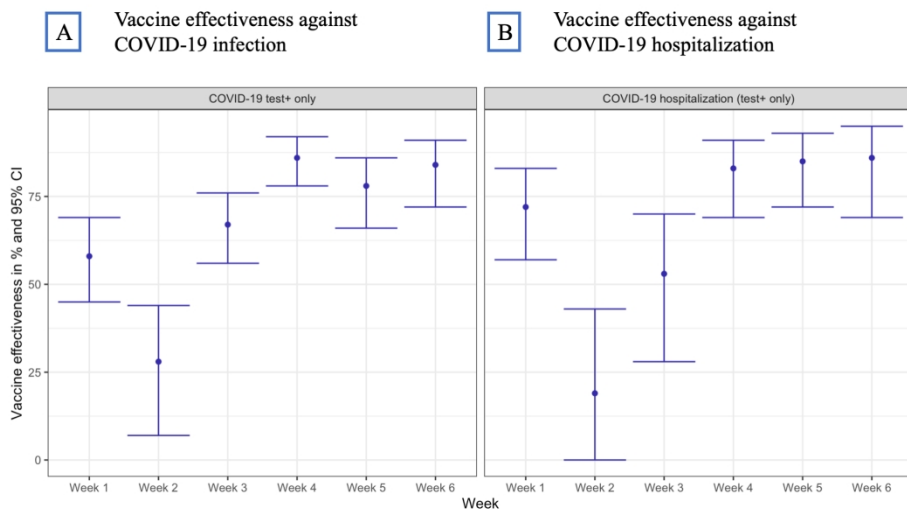

Effectiveness of Pfizer-BioNTech and Moderna vaccines over six 7-day intervals after 1st dose, % and 95% CI for COVID-19 infection (A) and COVID-19 hospitalization (B).

272x152mm (226 x 226 DPI)

1  
2  
3  
4  
5  
6  
7  
8  
9  
10  
11  
12  
13  
14  
15  
16  
17  
18  
19  
20  
21  
22  
23  
24  
25  
26  
27  
28  
29  
30  
31  
32  
33  
34  
35  
36  
37  
38  
39  
40  
41  
42  
43  
44  
45  
46  
47  
48  
49  
50  
51  
52  
53  
54  
55  
56  
57  
58  
59  
60



Chart review of COVID-19 cases (defined as a positive COVID-19 test) during week one, vaccinated and unvaccinated patients.

272x152mm (226 x 226 DPI)

## Supplementary materials

### Appendix 1. Data source description

The Columbia University Irving Medical Center (CUIMC) database comprises electronic health records on more than 6 million patients, with data collection starting in 1985. CUIMC is a Northeast US quaternary care center with primary care practices in northern Manhattan and surrounding areas, and the database includes inpatient and outpatient care. The database currently holds information about the person (demographics), visits (inpatient and outpatient), conditions (billing diagnoses and problem lists), drugs (outpatient prescriptions and inpatient orders and administrations), devices, measurements (laboratory tests and vital signs), and other observations (symptoms). The data sources include current and previous electronic health record systems (homegrown Clinical Information System, homegrown WebCIS, Allscripts Sunrise Clinical Manager, Allscripts TouchWorks, Epic Systems), administrative systems (IBM PCS-ADS, Eagle Registration, IDX Systems, Epic Systems), and ancillary systems (homegrown LIS, Sunquest, Cerner Laboratory). Additionally, it contains the information on vaccination from New York City and State immunization registries.

### Appendix 2. Retrospective cohort COVID-19 vaccine effectiveness study design overview.

#### Main analysis

**Target:** patients with at least one dose (Ad26.COV2.S BNT162b2 and mRNA-1273) located in NYC  
**Comparator:** unvaccinated patients matched on the date of vaccination located in NYC

#### Sensitivity analyses

- Alternative comparator: Patients matched on the visit
- Alternative target: fully vaccinated patients
- Alternative target and comparator: patients with or without prior COVID-19
- Alternative TAR: 1 day– 365 days

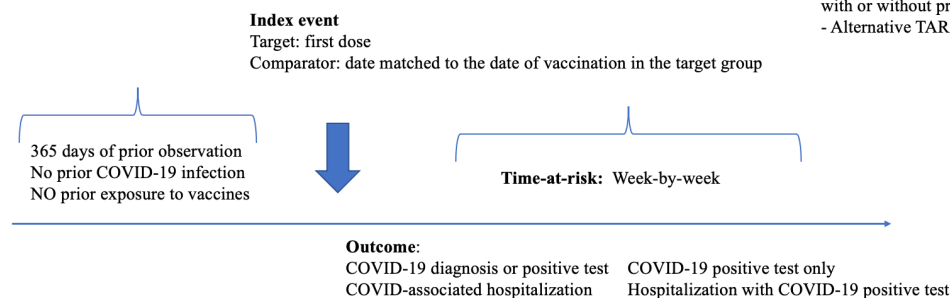

Cox proportional hazard model with 1:1 large scale propensity score matching (covariates include demographics, index year, month, # of visits; condition and drug groups; procedure, device, observation, measurement; long and short-term excluding day 0)

### Appendix 3. Cohort definitions and codes for the long-term COVID-19 vaccine effectiveness study

#### 3.1 Cohort definitions for vaccinated, unvaccinated and outcome cohorts for studying effectiveness of COVID-19 vaccines.

|                      | <b>Definition and link to the public repository</b>                                                                                                                                                                                                                                                                                                                                                                                                                                                                                                                                                                                                                                                                                                                                                                                                                                                                                                                                                                                                                                                                                                                                                                                                                                                                                                                                                                                                                                                                                                                                                                                                       |
|----------------------|-----------------------------------------------------------------------------------------------------------------------------------------------------------------------------------------------------------------------------------------------------------------------------------------------------------------------------------------------------------------------------------------------------------------------------------------------------------------------------------------------------------------------------------------------------------------------------------------------------------------------------------------------------------------------------------------------------------------------------------------------------------------------------------------------------------------------------------------------------------------------------------------------------------------------------------------------------------------------------------------------------------------------------------------------------------------------------------------------------------------------------------------------------------------------------------------------------------------------------------------------------------------------------------------------------------------------------------------------------------------------------------------------------------------------------------------------------------------------------------------------------------------------------------------------------------------------------------------------------------------------------------------------------------|
| Vaccinated cohorts   | <p>Vaccinated patients were defined as patients with at least one dose of the corresponding vaccine (Pfizer BioNTech, Moderna, Janssen)</p> <p>Index event: first exposure to the corresponding vaccine</p> <p>Inclusion and exclusion criteria:</p> <ul style="list-style-type: none"> <li>- 365 days of prior observation</li> <li>- no other COVID-19 vaccine exposure in 120 days prior and 120 days after the index date</li> <li>- no prior COVID-19 infection (diagnosis code of COVID-19 or positive test)</li> <li>- residence in New York City determined by the zip code recorded</li> </ul> <p>For the analysis on fully vaccinated patients, we applied the same criteria and required patients to have a) the second dose of Pfizer or Moderna vaccine (if applicable) within 14 to 56 days after the first dose b) at least 14 days of observation after the second dose (one dose of Janssen).</p> <p><b>Links:</b></p> <p><a href="https://atlas.ohdsi.org/#/cohortdefinition/498">https://atlas.ohdsi.org/#/cohortdefinition/498</a></p> <p><a href="https://atlas.ohdsi.org/#/cohortdefinition/494">https://atlas.ohdsi.org/#/cohortdefinition/494</a></p> <p><a href="https://atlas.ohdsi.org/#/cohortdefinition/497">https://atlas.ohdsi.org/#/cohortdefinition/497</a></p> <p><a href="https://atlas.ohdsi.org/#/cohortdefinition/418">https://atlas.ohdsi.org/#/cohortdefinition/418</a></p> <p><a href="https://atlas.ohdsi.org/#/cohortdefinition/417">https://atlas.ohdsi.org/#/cohortdefinition/417</a></p> <p><a href="https://atlas.ohdsi.org/#/cohortdefinition/420">https://atlas.ohdsi.org/#/cohortdefinition/420</a></p> |
| Unvaccinated cohorts | <p>Unvaccinated cohorts were created separately for each vaccinated cohort by selecting patients with no COVID-19 vaccination in their record (any vaccine), 365 days of prior observation and New York City residence. The patients were matched on the index date of one of the vaccinated group participants for the unvaccinated patients anchored on a date and on the date of a healthcare encounter within 3-day corridor for the unvaccinated patients anchored on a visit.</p>                                                                                                                                                                                                                                                                                                                                                                                                                                                                                                                                                                                                                                                                                                                                                                                                                                                                                                                                                                                                                                                                                                                                                                   |

|                 |                                                                                                                                                                                                                                                                                                                                                                                                                                                                                                                                                                                                                                                                                                                                                       |
|-----------------|-------------------------------------------------------------------------------------------------------------------------------------------------------------------------------------------------------------------------------------------------------------------------------------------------------------------------------------------------------------------------------------------------------------------------------------------------------------------------------------------------------------------------------------------------------------------------------------------------------------------------------------------------------------------------------------------------------------------------------------------------------|
| Outcome cohorts | <p>For the main analysis COVID-19 infection was defined as a COVID-19 test with the result 'Positive' or 'Detected'.</p> <p>COVID-19 associated hospitalization was defined as an inpatient, emergency department or intensive care unit admission with a positive COVID-19 test recorded within 30 days prior or during hospitalization.</p> <p>For a secondary analysis we applied the abovementioned criteria with adding COVID-19 diagnosis as an alternative for positive COVID-19 test.</p> <p>Links:</p> <p><a href="https://atlas.ohdsi.org/#/cohortdefinition/425">https://atlas.ohdsi.org/#/cohortdefinition/425</a></p> <p><a href="https://atlas.ohdsi.org/#/cohortdefinition/422">https://atlas.ohdsi.org/#/cohortdefinition/422</a></p> |
|-----------------|-------------------------------------------------------------------------------------------------------------------------------------------------------------------------------------------------------------------------------------------------------------------------------------------------------------------------------------------------------------------------------------------------------------------------------------------------------------------------------------------------------------------------------------------------------------------------------------------------------------------------------------------------------------------------------------------------------------------------------------------------------|

### 3.2 Codes used in the study.

#### 1. Pfizer vaccine:

RxNorm 2468235 SARS-CoV-2 (COVID-19) vaccine, mRNA-BNT162b2 0.1 MG/ML  
Injectable Suspension

#### 2. Moderna vaccine:

RxNorm 2470234 SARS-CoV-2 (COVID-19) vaccine, mRNA-1273 0.2 MG/ML Injectable  
Suspension

#### 3. Janssen vaccine:

CVX 212 SARS-COV-2 (COVID-19) vaccine, vector non-replicating, recombinant spike  
protein-Ad26, preservative free, 0.5 mL

#### 4. COVID-19 diagnosis:

ICD10-CM U07.1 Emergency use of U07.1 | COVID-19

#### 5. COVID-19 test:

LOINC 94500-6 SARS-CoV-2 (COVID-19) RNA [Presence] in Respiratory specimen by NAA  
with probe detection

LOINC 94558-4 SARS-CoV-2 (COVID-19) Ag [Presence] in Respiratory specimen by Rapid  
immunoassay



1  
2  
3  
4  
5  
6  
7  
8  
9  
10  
11  
12  
13  
14  
15  
16  
17  
18  
19  
20  
21  
22  
23  
24  
25  
26  
27  
28  
29  
30  
31  
32  
33  
34  
35  
36  
37  
38  
39  
40  
41  
42  
43  
44  
45  
46  
47  
48  
49  
50  
51  
52  
53  
54  
55  
56  
57  
58  
59  
60

#### Appendix 4. Negative controls

| SNOMED concept id | SNOMED concept name                                       |
|-------------------|-----------------------------------------------------------|
| 438945            | Accidental poisoning by benzodiazepine-based tranquilizer |
| 434455            | Acquired claw toes                                        |
| 316211            | Acquired spondylolisthesis                                |
| 201612            | Alcoholic liver damage                                    |
| 438730            | Alkalosis                                                 |
| 441258            | Anemia in neoplastic disease                              |
| 432513            | Animal bite wound                                         |
| 4171556           | Ankle ulcer                                               |
| 4098292           | Antiphospholipid syndrome                                 |
| 77650             | Aseptic necrosis of bone                                  |
| 4239873           | Benign neoplasm of ciliary body                           |
| 23731             | Benign neoplasm of larynx                                 |
| 199764            | Benign neoplasm of ovary                                  |
| 195500            | Benign neoplasm of uterus                                 |
| 4145627           | Biliary calculus                                          |
| 4108471           | Burn of digit of hand                                     |
| 75121             | Burn of lower leg                                         |
| 4284982           | Calculus of bile duct without obstruction                 |
| 434327            | Cannabis abuse                                            |
| 78497             | Cellulitis and abscess of toe                             |
| 4001454           | Cervical spine ankylosis                                  |
| 4068241           | Chronic instability of knee                               |
| 195596            | Chronic pancreatitis                                      |
| 4206338           | Chronic salpingitis                                       |
| 4058397           | Claustrophobia                                            |
| 74816             | Contusion of toe                                          |
| 73302             | Curvature of spine                                        |
| 4151134           | Cyst of pancreas                                          |
| 77638             | Displacement of intervertebral disc without myelopathy    |
| 195864            | Diverticulum of bladder                                   |
| 201346            | Edema of penis                                            |
| 200461            | Endometriosis of uterus                                   |
| 377877            | Esotropia                                                 |
| 193530            | Follicular cyst of ovary                                  |
| 4094822           | Foreign body in respiratory tract                         |
| 443421            | Gallbladder and bile duct calculi                         |

|          |                                                 |
|----------|-------------------------------------------------|
| 4299408  | Gouty tophus                                    |
| 135215   | Hashimoto thyroiditis                           |
| 442190   | Hemorrhage of colon                             |
| 43020475 | High risk heterosexual behavior                 |
| 194149   | Hirschsprung's disease                          |
| 443204   | Human ehrlichiosis                              |
| 4226238  | Hyperosmolar coma due to diabetes mellitus      |
| 4032787  | Hyperosmolarity                                 |
| 197032   | Hyperplasia of prostate                         |
| 140362   | Hypoparathyroidism                              |
| 435371   | Hypothermia                                     |
| 138690   | Infestation by Pediculus                        |
| 4152376  | Intentional self poisoning                      |
| 192953   | Intestinal adhesions with obstruction           |
| 196347   | Intestinal parasitism                           |
| 137977   | Jaundice                                        |
| 317510   | Leukemia                                        |
| 765053   | Lump in right breast                            |
| 378165   | Nystagmus                                       |
| 434085   | Obstruction of duodenum                         |
| 4147016  | Open wound of buttock                           |
| 4129404  | Open wound of upper arm                         |
| 438120   | Opioid dependence                               |
| 75924    | Osteodystrophy                                  |
| 432594   | Osteomalacia                                    |
| 30365    | Panhypopituitarism                              |
| 4108371  | Peripheral gangrene                             |
| 440367   | Plasmacytosis                                   |
| 439233   | Poisoning by antidiabetic agent                 |
| 442149   | Poisoning by bee sting                          |
| 4314086  | Poisoning due to sting of ant                   |
| 4147660  | Postural kyphosis                               |
| 434319   | Premature ejaculation                           |
| 199754   | Primary malignant neoplasm of pancreas          |
| 4311499  | Primary malignant neoplasm of respiratory tract |
| 436635   | Primary malignant neoplasm of sigmoid colon     |
| 196044   | Primary malignant neoplasm of stomach           |
| 433716   | Primary malignant neoplasm of testis            |
| 133424   | Primary malignant neoplasm of thyroid gland     |

|          |                                                     |
|----------|-----------------------------------------------------|
| 194997   | Prostatitis                                         |
| 80286    | Prosthetic joint loosening                          |
| 443274   | Psychostimulant dependence                          |
| 314962   | Raynaud's disease                                   |
| 37018294 | Residual osteitis                                   |
| 4288241  | Salmonella enterica subspecies arizonae infection   |
| 45757269 | Sclerosing mesenteritis                             |
| 74722    | Secondary localized osteoarthritis of pelvic region |
| 200348   | Secondary malignant neoplasm of large intestine     |
| 43020446 | Sedative withdrawal                                 |
| 74194    | Sprain of spinal ligament                           |
| 4194207  | Tailor's bunion                                     |
| 193521   | Tropical sprue                                      |
| 40482801 | Type II diabetes mellitus uncontrolled              |
| 74719    | Ulcer of foot                                       |
| 196625   | Viral hepatitis A without hepatic coma              |
| 197494   | Viral hepatitis C                                   |
| 4284533  | Vitamin D-dependent rickets                         |

Link to the original list of negative controls used in EUMAEUS study: [https://ohdsi-studies.github.io/Eumaeus/Protocol.html#8\\_Research\\_Methods](https://ohdsi-studies.github.io/Eumaeus/Protocol.html#8_Research_Methods)

**Appendix 5.** Summary of manual chart review of COVID-19 infection cases during week 1 after the index date, patients vaccinated with mRNA vaccines and unvaccinated patients.

|                                                           | <b>Pfizer-BioNTech</b> | <b>Moderna</b> | <b>Pfizer-BioNTech and Moderna</b> | <b>Unvaccinated patients</b> |
|-----------------------------------------------------------|------------------------|----------------|------------------------------------|------------------------------|
| Total                                                     | 36                     | 25             | 61                                 | 28                           |
| Average age                                               | 65                     | 67.8           | 65.8                               | 58                           |
| <b>COVID-19 symptoms</b>                                  |                        |                |                                    |                              |
| Severe                                                    | 14 (39%)               | 7 (28%)        | 21 (34%)                           | 6 (21%)                      |
| Mild                                                      | 18 (50%)               | 11 (44%)       | 29 (48%)                           | 11 (39%)                     |
| Asymptomatic                                              | 2 (6%)                 | 7 (28%)        | 9 (15%)                            | 11 (39%)                     |
| <b>Reason for coming for initial healthcare encounter</b> |                        |                |                                    |                              |
| COVID-19 symptoms                                         | 17 (47%)               | 8 (32%)        | 25 (41%)                           | 18 (64%)                     |
| Exposure to COVID-19                                      | 3 (8%)                 | 4 (16%)        | 7 (11%)                            | 5 (18%)                      |
| For other reason (co-morbidities, procedures etc.)        | 13 (36%)               | 11 (44%)       | 24 (39%)                           | 6 (21%)                      |
| <b>Type of initial healthcare encounter</b>               |                        |                |                                    |                              |
| Telehealth/phone                                          | 5 (14%)                | 6 (24%)        | 11 (18%)                           | 3 (11%)                      |
| Test only                                                 | 3 (8%)                 | 2 (8%)         | 5 (8%)                             | 6 (21%)                      |
| OP                                                        | 4 (11%)                | 3 (12%)        | 7 (11%)                            | 1 (4%)                       |
| ED or IP                                                  | 24 (67%)               | 14 (56%)       | 38 (62%)                           | 18 (64%)                     |

**Appendix 6.** Kaplan-Meier curves for effectiveness of COVID-19 Pfizer-BioNTech vaccine for time-at-risk of 1 day – 365 days after the first dose compared to the unvaccinated patients residing in New York City.

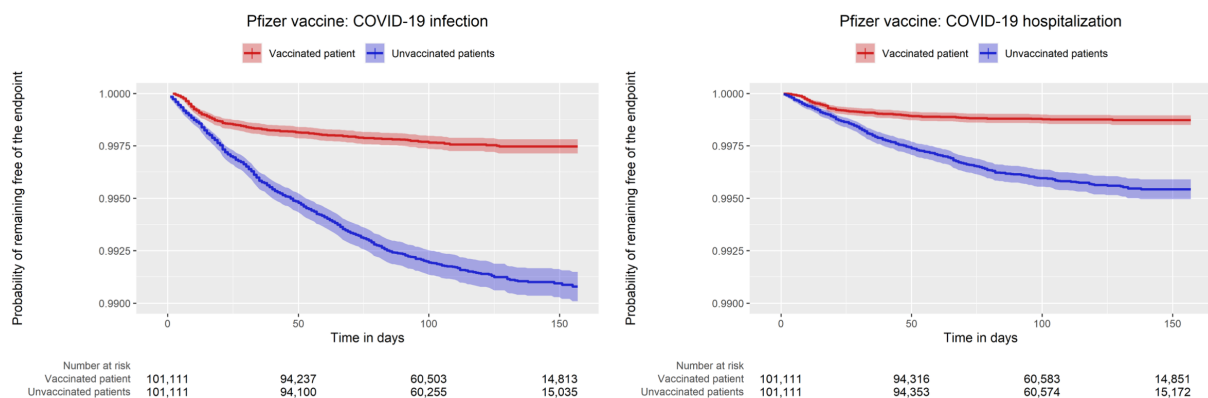

**Appendix 7.** Kaplan-Meier curves for effectiveness of COVID-19 Moderna vaccine for time-at-risk of 1 day – 365 days after the first dose compared to the unvaccinated patients residing in New York City.

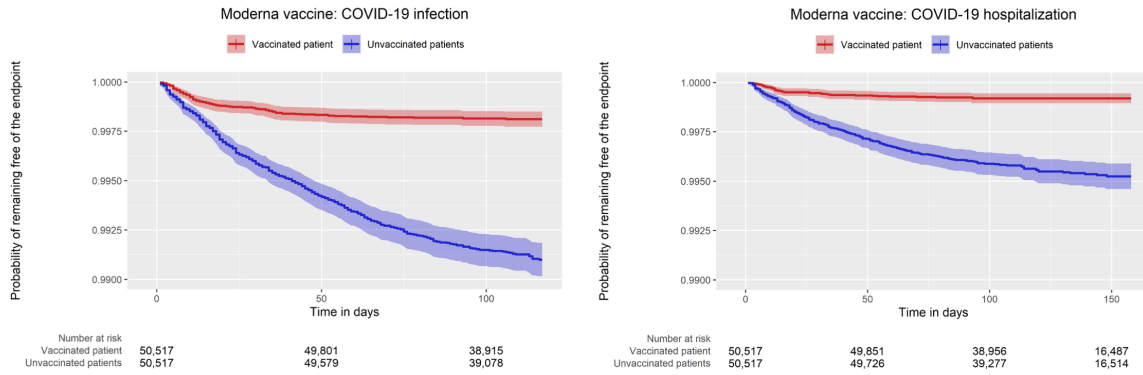

**Appendix 8.** Kaplan-Meier curves for effectiveness of COVID-19 Janssen vaccine for time-at-risk of 1 day – 365 days after the first dose compared to the unvaccinated patients residing in New York City.

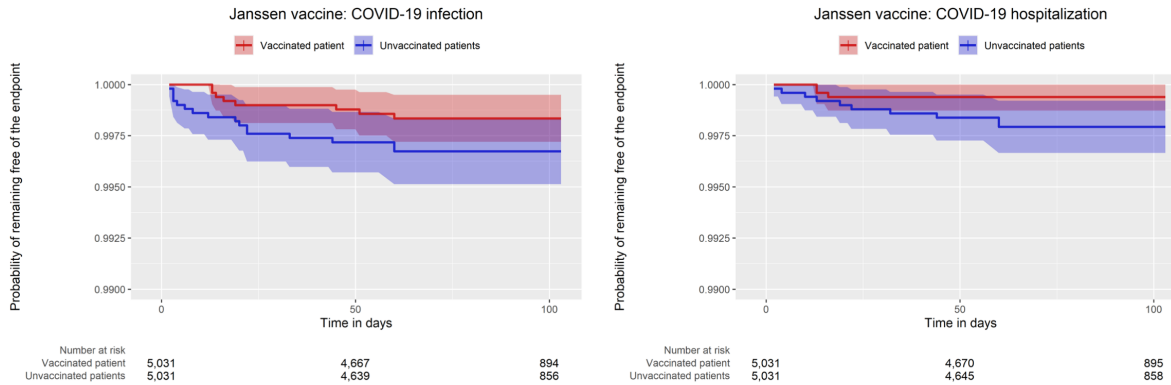

**Appendix 9.** Estimates for long-term effectiveness of COVID-19 vaccines for time-at-risk of 1 day – 365 days after the first dose in the vaccinated patients without prior COVID-19 infection compared to unvaccinated patients residing in NYC.

|                        | COVID-19 infection |         | COVID-19 hospitalization |         | COVID-19 positive test only |         | COVID-19 positive test only hospitalization |         |
|------------------------|--------------------|---------|--------------------------|---------|-----------------------------|---------|---------------------------------------------|---------|
|                        | VE (95% CI), %     | P-value | VE (95% CI), %           | P-value | VE (95% CI), %              | P-value | VE (95% CI), %                              | P-value |
| <b>Pfizer-BioNTech</b> | 42 (37 – 47)       | <0.01   | 63 (56-70)               | <0.01   | 71 (66 - 75)                | <0.01   | 69 (62 - 75)                                | <0.01   |
| <b>Moderna</b>         | 54 (48 – 60)       | <0.01   | 76 (69 – 82)             | <0.01   | 78 (73 – 83)                | <0.01   | 81 (74 – 87)                                | <0.01   |
| <b>Janssen</b>         | 24 (0-55)          | 0.31    | 64 (0.1 – 1.06)          | 0.09    | 53 (0 – 82)                 | 0.1     | 70 (2 – 93)                                 | 0.08    |

**Appendix 10.** Estimates for effectiveness of COVID-19 vaccines for time-at-risk of 1 day – 365 days after full vaccination in fully vaccinated patients without prior COVID-19 infection compared to unvaccinated patients residing in NYC.

|                        | COVID-19 positive test only |         | COVID-19 positive test only hospitalization |         | COVID-19 infection |         | COVID-19 hospitalization |         |
|------------------------|-----------------------------|---------|---------------------------------------------|---------|--------------------|---------|--------------------------|---------|
|                        | VE (95% CI), %              | P-value | VE (95% CI), %                              | P-value | VE (95% CI), %     | P-value | VE (95% CI), %           | P-value |
| <b>Pfizer-BioNTech</b> | 94 (91-95)                  | <0.01   | 95 (92-97)                                  | <0.01   | 70 (66-74)         | <0.01   | 88 (84-92)               | <0.01   |
| <b>Moderna</b>         | 97 (94-98)                  | <0.01   | 96 (92-99)                                  | <0.01   | 72 (66 – 77)       | <0.01   | 92 (87-95)               | <0.01   |
| <b>Janssen</b>         | 81 (50-94)                  | <0.01   | 92 (58-100)                                 | 0.03    | 55 (23 – 75)       | 0.01    | 87 (56-98)               | 0.01    |

**Appendix 11.** Comparison of the effectiveness estimates in fully vaccinated patients obtained in our study and those from the randomized clinical trials of the corresponding vaccines.

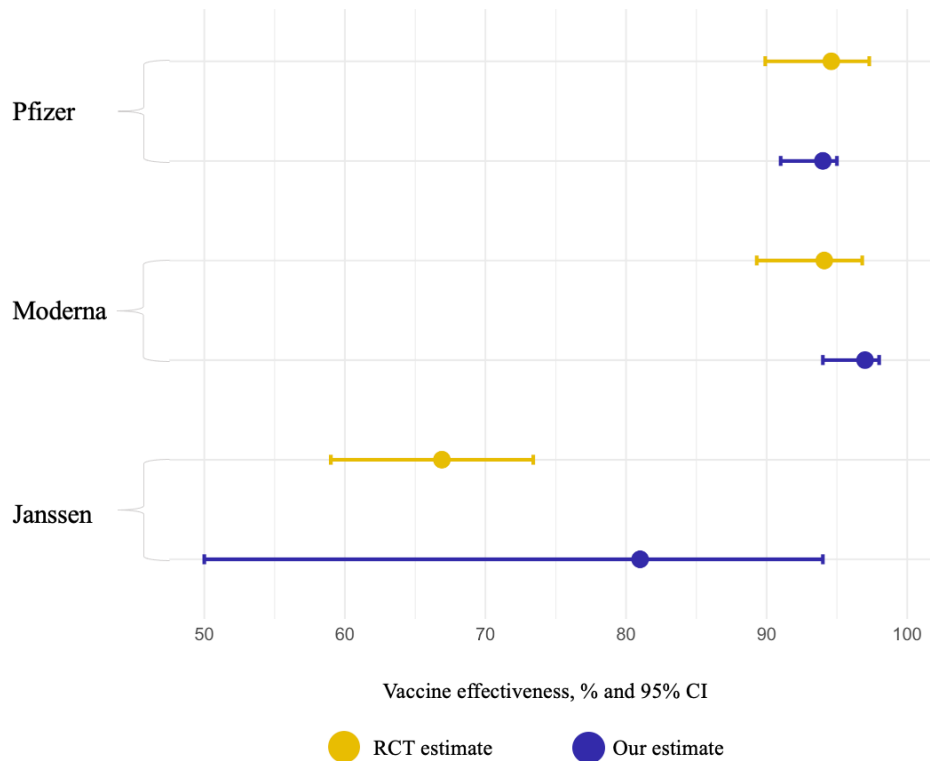

**Appendix 12.** Estimates for effectiveness of COVID-19 vaccines for time-at-risk of 1 day – 365 days after the first dose in the vaccinated patients with or without prior COVID-19 infection compared to unvaccinated patients residing in NYC.

|                        | COVID-19 infection |         | COVID-19 hospitalization |         | COVID-19 positive test only |         | COVID-19 positive test only hospitalization |         |
|------------------------|--------------------|---------|--------------------------|---------|-----------------------------|---------|---------------------------------------------|---------|
|                        | VE (95% CI), %     | P-value | VE (95% CI), %           | P-value | VE (95% CI), %              | P-value | VE (95% CI), %                              | P-value |
| <b>Pfizer-BioNTech</b> | 43 (38-48)         | <0.01   | 64 (57-70)               | <0.01   | 71 (66-75)                  | <0.01   | 71(64-76)                                   | <0.01   |
| <b>Moderna</b>         | 51 (45-57)         | <0.01   | 71 (63-78)               | <0.01   | 76 (71-81)                  | <0.01   | 81 (73-86)                                  | <0.01   |
| <b>Janssen</b>         | 15 (0-49)          | 0.52    | 60 (2-86)                | 0.06    | 45 (0-75)                   | 0.12    | 63 (0-90)                                   | 0.09    |

STROBE Statement—Checklist of items that should be included in reports of *cohort studies*

|                              | Item No | Recommendation                                                                                                                                                                                                                                                                                                         | Page No                      |
|------------------------------|---------|------------------------------------------------------------------------------------------------------------------------------------------------------------------------------------------------------------------------------------------------------------------------------------------------------------------------|------------------------------|
| <b>Title and abstract</b>    | 1       | (a) Indicate the study's design with a commonly used term in the title or the abstract                                                                                                                                                                                                                                 | 2                            |
|                              |         | (b) Provide in the abstract an informative and balanced summary of what was done and what was found                                                                                                                                                                                                                    | 2                            |
| <b>Introduction</b>          |         |                                                                                                                                                                                                                                                                                                                        |                              |
| Background/rationale         | 2       | Explain the scientific background and rationale for the investigation being reported                                                                                                                                                                                                                                   | 4                            |
| Objectives                   | 3       | State specific objectives, including any prespecified hypotheses                                                                                                                                                                                                                                                       | 5                            |
| <b>Methods</b>               |         |                                                                                                                                                                                                                                                                                                                        |                              |
| Study design                 | 4       | Present key elements of study design early in the paper                                                                                                                                                                                                                                                                | 5                            |
| Setting                      | 5       | Describe the setting, locations, and relevant dates, including periods of recruitment, exposure, follow-up, and data collection                                                                                                                                                                                        | 5,6                          |
| Participants                 | 6       | (a) Give the eligibility criteria, and the sources and methods of selection of participants. Describe methods of follow-up<br>(b) For matched studies, give matching criteria and number of exposed and unexposed                                                                                                      | 5                            |
| Variables                    | 7       | Clearly define all outcomes, exposures, predictors, potential confounders, and effect modifiers. Give diagnostic criteria, if applicable                                                                                                                                                                               | 5-7                          |
| Data sources/<br>measurement | 8*      | For each variable of interest, give sources of data and details of methods of assessment (measurement). Describe comparability of assessment methods if there is more than one group                                                                                                                                   | 5                            |
| Bias                         | 9       | Describe any efforts to address potential sources of bias                                                                                                                                                                                                                                                              | 6-7                          |
| Study size                   | 10      | Explain how the study size was arrived at                                                                                                                                                                                                                                                                              | 5                            |
| Quantitative variables       | 11      | Explain how quantitative variables were handled in the analyses. If applicable, describe which groupings were chosen and why                                                                                                                                                                                           | 6-7                          |
| Statistical methods          | 12      | (a) Describe all statistical methods, including those used to control for confounding<br>(b) Describe any methods used to examine subgroups and interactions<br>(c) Explain how missing data were addressed<br>(d) If applicable, explain how loss to follow-up was addressed<br>(e) Describe any sensitivity analyses | 6-7<br>6-7<br>-<br>NA<br>6-7 |
| <b>Results</b>               |         |                                                                                                                                                                                                                                                                                                                        |                              |
| Participants                 | 13*     | (a) Report numbers of individuals at each stage of study—eg numbers potentially eligible, examined for eligibility, confirmed eligible, included in the study, completing follow-up, and analysed<br>(b) Give reasons for non-participation at each stage<br>(c) Consider use of a flow diagram                        | 7                            |
| Descriptive data             | 14*     | (a) Give characteristics of study participants (eg demographic, clinical, social) and information on exposures and potential confounders<br>(b) Indicate number of participants with missing data for each variable of interest<br>(c) Summarise follow-up time (eg, average and total amount)                         | 8,<br>18-<br>20<br><br>8, 18 |
| Outcome data                 | 15*     | Report numbers of outcome events or summary measures over time                                                                                                                                                                                                                                                         | 8                            |



|    |                          |    |                                                                                                                                                                                                              |                            |
|----|--------------------------|----|--------------------------------------------------------------------------------------------------------------------------------------------------------------------------------------------------------------|----------------------------|
| 1  | Main results             | 16 | (a) Give unadjusted estimates and, if applicable, confounder-adjusted estimates and their precision (eg, 95% confidence interval). Make clear which confounders were adjusted for and why they were included | 8, supplementary materials |
| 2  |                          |    | (b) Report category boundaries when continuous variables were categorized                                                                                                                                    |                            |
| 3  |                          |    | (c) If relevant, consider translating estimates of relative risk into absolute risk for a meaningful time period                                                                                             |                            |
| 4  | Other analyses           | 17 | Report other analyses done—eg analyses of subgroups and interactions, and sensitivity analyses                                                                                                               | 9                          |
| 5  | <b>Discussion</b>        |    |                                                                                                                                                                                                              |                            |
| 6  | Key results              | 18 | Summarise key results with reference to study objectives                                                                                                                                                     | 10                         |
| 7  | Limitations              | 19 | Discuss limitations of the study, taking into account sources of potential bias or imprecision. Discuss both direction and magnitude of any potential bias                                                   | 12                         |
| 8  | Interpretation           | 20 | Give a cautious overall interpretation of results considering objectives, limitations, multiplicity of analyses, results from similar studies, and other relevant evidence                                   | 10-12                      |
| 9  | Generalisability         | 21 | Discuss the generalisability (external validity) of the study results                                                                                                                                        | 11-12                      |
| 10 | <b>Other information</b> |    |                                                                                                                                                                                                              |                            |
| 11 | Funding                  | 22 | Give the source of funding and the role of the funders for the present study and, if applicable, for the original study on which the present article is based                                                | 13                         |

\*Give information separately for exposed and unexposed groups.

**Note:** An Explanation and Elaboration article discusses each checklist item and gives methodological background and published examples of transparent reporting. The STROBE checklist is best used in conjunction with this article (freely available on the Web sites of PLoS Medicine at <http://www.plosmedicine.org/>, Annals of Internal Medicine at <http://www.annals.org/>, and Epidemiology at <http://www.epidem.com/>). Information on the STROBE Initiative is available at <http://www.strobe-statement.org>.
